# Supplementary material
Source: Elsevier journal article supplement (https://www.sciencedirect.com/science/article/pii/S1885585721000165)
Supplement: mmc1 [file S1885585721000165:mmc1.pdf]

## SUPPLEMENTARY DATA

### Table 1 of the supplementary data

213 genes related to inherited cardiovascular diseases and sudden death included in our custom probe library

|              |                                                                |
|--------------|----------------------------------------------------------------|
| AARS2        | Alanine-tRNA ligase, mitochondrial                             |
| ABCC9        | ATP-binding cassette, subfamily C (CFTR/MRP), member 9         |
| ACAD9        | Acyl-CoA dehydrogenase family member 9, mitochondrial          |
| ACADM        | Medium-chain specific acyl-CoA dehydrogenase, mitochondrial    |
| ACADVL       | Very long-chain specific acyl-CoA dehydrogenase, mitochondrial |
| ACTA1        | Actin, alfa 1, skeletal muscle                                 |
| ACTA2        | Actin, aortic smooth muscle                                    |
| <b>ACTC1</b> | <b>Actin, alpha cardiac muscle 1 **</b>                        |
| ACTN2        | Alpha-actinin-2                                                |
| ACVRL1       | Serine/threonine-protein kinase receptor R3                    |
| ADAMTSL4     | ADAMTS-like protein 4                                          |
| AGK          | Acylglycerol kinase, mitochondrial                             |
| AGL          | Glycogen debranching enzyme                                    |
| AGPAT2       | 1-acyl-sn-glycerol-3-phosphate acyltransferase beta            |
| AKAP9        | A-kinase anchor protein 9                                      |
| ALMS1        | Alstrom syndrome protein 1                                     |
| ANK2         | Ankyrin 2                                                      |
| ANK3         | Ankyrin-3                                                      |
| ANKRD1       | Ankyrin repeat domain-containing protein 1                     |
| APOA5        | Apolipoprotein A-V                                             |
| APOB         | Apolipoprotein B-100                                           |
| APOC3        | Apolipoprotein C-III                                           |
| ATPAF2       | ATP synthase mitochondrial F1 complex assembly factor 2        |

|                 |                                                           |
|-----------------|-----------------------------------------------------------|
| <i>BAG3</i>     | BAG family molecular chaperone regulator 3                |
| <i>BMPR1B</i>   | Bone morphogenetic protein receptor type-1B               |
| <i>BMPR2</i>    | Bone morphogenetic protein receptor type II               |
| <i>BRAF</i>     | Serine/threonine-protein kinase B-raf                     |
| <i>BSCL2</i>    | Seipin                                                    |
| <i>CACNA1C</i>  | Voltage-dependent L-type calcium channel subunit alpha-1C |
| <i>CACNA1D</i>  | Voltage-dependent L-type calcium channel subunit alpha-1D |
| <i>CACNA2D1</i> | Voltage-dependent calcium channel subunit alpha-2/delta-1 |
| <i>CACNB2</i>   | Voltage-dependent L-type calcium channel subunit beta-2   |
| <i>CALM1</i>    | Calmodulin                                                |
| <i>CALM2</i>    | Calmodulin                                                |
| <i>CALR3</i>    | Calreticulin 3                                            |
| <i>CAPN3</i>    | Calpain-3                                                 |
| <i>CASQ2</i>    | Calsequestrin-2                                           |
| <i>CAV1</i>     | Caveolin-1                                                |
| <i>CAV3</i>     | Caveolin-3                                                |
| <i>CBL</i>      | E3 ubiquitin-protein ligase CBL                           |
| <i>CBS</i>      | Cystathionine beta-synthase                               |
| <i>CETP</i>     | Cholesteryl ester transfer protein                        |
| <i>COL1A1</i>   | Collagen alpha-1(I) chain                                 |
| <i>COL1A2</i>   | Collagen alpha-2(I) chain                                 |
| <i>COL3A1</i>   | Collagen alpha-1(III) chain                               |
| <i>COL5A1</i>   | Collagen alpha-1(V) chain                                 |
| <i>COL5A2</i>   | Collagen alpha-2(V) chain                                 |
| <i>COQ2</i>     | 4-hydroxybenzoate polyprenyltransferase, mitochondrial    |
| <i>COX15</i>    | Cytochrome c oxidase assembly protein COX15 homolog       |
| <i>COX6B1</i>   | Cytochrome c oxidase subunit 6B1                          |
| <i>CRELD1</i>   | Cysteine-rich with EGF-like domain protein 1              |
| <i>CRYAB</i>    | Alpha-crystallin B chain                                  |

|                     |                                                               |
|---------------------|---------------------------------------------------------------|
| <i>CSRP3</i>        | Cysteine and glycine-rich protein 3                           |
| <i>CTF1</i>         | Cardiotrophin 1                                               |
| <i>CTNNA3</i>       | Catenin alpha-3                                               |
| <b><i>DES</i></b>   | <b>Desmin **</b>                                              |
| <i>DLD</i>          | Dihydrolipoyl dehydrogenase, mitochondrial                    |
| <i>DMD</i>          | Dystrophin                                                    |
| <i>DNAJC19</i>      | Mitochondrial import inner membrane translocase subunit TIM14 |
| <i>DOLK</i>         | Dolichol kinase                                               |
| <i>DSC2</i>         | Desmocollin 2                                                 |
| <i>DSG2</i>         | Desmoglein 2                                                  |
| <i>DSP</i>          | Desmoplakin                                                   |
| <i>DTNA</i>         | Dystrobrevin alpha                                            |
| <i>ELN</i>          | Elastin                                                       |
| <i>EMD</i>          | Emerin                                                        |
| <i>ENG</i>          | Endoglin                                                      |
| <i>EYA4</i>         | Eyes absent homolog 4                                         |
| <i>FAH</i>          | Fumarylacetoacetase                                           |
| <i>FBN1</i>         | Fibrillin 1                                                   |
| <i>FBN2</i>         | Fibrillin 2                                                   |
| <b><i>FHL1</i></b>  | <b>Four and a half LIM domains protein 1 **</b>               |
| <i>FHL2</i>         | Four and a half LIM domains 2                                 |
| <b><i>FHOD3</i></b> | <b>FH1/FH2 domain-containing protein 3 **</b>                 |
| <i>FKRP</i>         | Fukutin-related protein                                       |
| <i>FKTN</i>         | Fukutin                                                       |
| <i>FLNA</i>         | Filamin-A                                                     |
| <i>FLNC</i>         | Filamin-C                                                     |
| <i>FOXD4</i>        | Forkhead box protein D4                                       |
| <i>GAA</i>          | Lysosomal alpha-glucosidase                                   |
| <i>GATA4</i>        | Transcription factor GATA-4                                   |

|               |                                                                                |
|---------------|--------------------------------------------------------------------------------|
| <i>GATA6</i>  | Transcription factor GATA-6                                                    |
| <i>GATAD1</i> | GATA zinc finger domain-containing protein 1                                   |
| <i>GDF2</i>   | Growth/differentiation factor 2                                                |
| <i>GFM1</i>   | Elongation factor G, mitochondrial                                             |
| <i>GJA1</i>   | Gap junction alpha-1 protein                                                   |
| <i>GJA5</i>   | Gap junction alpha-5 protein                                                   |
| <b>GLA</b>    | <b>Alpha-galactosidase A **</b>                                                |
| <i>GLB1</i>   | Beta-galactosidase                                                             |
| <i>GNPTAB</i> | N-acetylglucosamine-1-phosphotransferase subunits alpha/beta                   |
| <i>GPD1L</i>  | Glycerol-3-phosphate dehydrogenase 1-like protein                              |
| <i>GUSB</i>   | Beta-glucuronidase                                                             |
| <i>HCN4</i>   | Potassium/sodium hyperpolarization-activated cyclic nucleotide-gated channel 4 |
| <i>HFE</i>    | Hereditary hemochromatosis protein                                             |
| <i>HRAS</i>   | GTPase HRas                                                                    |
| <i>JAG1</i>   | Jagged-1                                                                       |
| <i>JPH2</i>   | Junctophilin 2                                                                 |
| <i>JUP</i>    | Junction plakoglobin                                                           |
| <i>KCNA5</i>  | Potassium voltage-gated channel subfamily A member 5                           |
| <i>KCND3</i>  | Potassium voltage-gated channel subfamily D member 3                           |
| <i>KCNE1</i>  | Potassium voltage-gated channel subfamily E member 1                           |
| <i>KCNE1L</i> | Potassium voltage-gated channel subfamily E member 1-like protein              |
| <i>KCNE2</i>  | Potassium voltage-gated channel subfamily E member 2                           |
| <i>KCNE3</i>  | Potassium voltage-gated channel subfamily E member 3                           |
| <i>KCNH2</i>  | Potassium voltage-gated channel subfamily H member 2                           |
| <i>KCNJ2</i>  | Inward rectifier potassium channel 2                                           |
| <i>KCNJ5</i>  | G protein-activated inward rectifier potassium channel 4                       |
| <i>KCNJ8</i>  | ATP-sensitive inward rectifier potassium channel 8                             |
| <i>KCNK3</i>  | Potassium channel subfamily K member 3                                         |
| <i>KCNQ1</i>  | Potassium voltage-gated channel subfamily KQT member 1                         |

|               |                                                                               |
|---------------|-------------------------------------------------------------------------------|
| <i>KLF10</i>  | Krueppel-like factor 10                                                       |
| <i>KRAS</i>   | GTPase KRas                                                                   |
| <i>LAMA2</i>  | Laminin subunit alpha-2                                                       |
| <i>LAMA4</i>  | Laminin subunit alpha-4                                                       |
| <b>LAMP2</b>  | <b>Lysosome-associated membrane glycoprotein 2 **</b>                         |
| <i>LDB3</i>   | LIM domain-binding protein 3                                                  |
| <i>LDLR</i>   | Low-density lipoprotein receptor                                              |
| <i>LIAS</i>   | Lipoyl synthase, mitochondrial                                                |
| <i>LMNA</i>   | Prelamin-A/C                                                                  |
| <i>LRP6</i>   | Low-density lipoprotein receptor-related protein 6                            |
| <i>MAP2K1</i> | Dual specificity mitogen-activated protein kinase kinase 1                    |
| <i>MAP2K2</i> | Dual specificity mitogen-activated protein kinase kinase 2                    |
| <i>MIB1</i>   | E3 ubiquitin-protein ligase MIB1                                              |
| <i>MLYCD</i>  | Malonyl-CoA decarboxylase, mitochondrial                                      |
| <i>MRPL3</i>  | 39S ribosomal protein L3, mitochondrial                                       |
| <i>MRPS22</i> | 28S ribosomal protein S22, mitochondrial                                      |
| <i>MTO1</i>   | Protein MTO1 homolog, mitochondrial                                           |
| <i>MURC</i>   | Muscle-related coiled coil protein                                            |
| <b>MYBPC3</b> | <b>Myosin-binding protein C, cardiac-type **</b>                              |
| <i>MYH11</i>  | Myosin-11                                                                     |
| <i>MYH6</i>   | Myosin-6                                                                      |
| <b>MYH7</b>   | <b>Myosin-7 **</b>                                                            |
| <b>MYL2</b>   | <b>Myosin regulatory light chain 2, ventricular/cardiac muscle isoform **</b> |
| <b>MYL3</b>   | <b>Myosin light chain 3 **</b>                                                |
| <i>MYLK</i>   | Myosin light chain kinase, smooth muscle                                      |
| <i>MYLK2</i>  | Myosin light chain kinase 2, skeletal/cardiac muscle                          |
| <i>MYOT</i>   | Myotilin                                                                      |
| <i>MYOZ2</i>  | Myozenin 2                                                                    |
| <i>MYPN</i>   | Myopalladin                                                                   |

|               |                                                                                |
|---------------|--------------------------------------------------------------------------------|
| NEBL          | Nebulette                                                                      |
| NEXN          | Nexilin                                                                        |
| NKX2-5        | Homeobox protein Nkx-2.5                                                       |
| NOTCH1        | Neurogenic locus notch homolog protein 1                                       |
| NOTCH3        | Neurogenic locus notch homolog protein 3                                       |
| NPPA          | Atrial natriuretic factor                                                      |
| NRAS          | GTPase NRas                                                                    |
| OBSL1         | Obscurin-like protein 1                                                        |
| PCSK9         | Proprotein convertase subtilisin/kexin type 9                                  |
| PDHA1         | Pyruvate dehydrogenase E1 component subunit alpha, somatic form, mitochondrial |
| PDLIM3        | PDZ and LIM domain protein 3                                                   |
| PHKA1         | Phosphorylase b kinase regulatory subunit alpha, skeletal muscle isoform       |
| PITX2         | Pituitary homeobox 2                                                           |
| PKP2          | Plakophilin 2                                                                  |
| PLN           | Cardiac phospholamban                                                          |
| PLOD1         | Procollagen-lysine,2-oxoglutarate 5-dioxygenase 1                              |
| PMM2          | Phosphomannomutase 2                                                           |
| PRDM16        | PR domain zinc finger protein 16                                               |
| <b>PRKAG2</b> | <b>5'-AMP-activated protein kinase subunit gamma-2 **</b>                      |
| PRKG1         | cGMP-dependent protein kinase 1                                                |
| PSEN1         | Presenilin-1                                                                   |
| PSEN2         | Presenilin 2                                                                   |
| <b>PTPN11</b> | <b>Tyrosine-protein phosphatase nonreceptor type 11 **</b>                     |
| RAF1          | RAF proto-oncogene serine/threonine-protein kinase                             |
| RANGRF        | Ran guanine nucleotide release factor                                          |
| RBM20         | Probable RNA-binding protein 20                                                |
| RYR2          | Ryanodine receptor 2                                                           |
| SCN10A        | Sodium channel protein type 10 subunit alpha                                   |
| SCN1B         | Sodium channel subunit beta-1                                                  |

|                |                                                                    |
|----------------|--------------------------------------------------------------------|
| <i>SCN2B</i>   | Sodium channel subunit beta-2                                      |
| <i>SCN3B</i>   | Sodium channel subunit beta-3                                      |
| <i>SCN4B</i>   | Sodium channel subunit beta-4                                      |
| <i>SCN5A</i>   | Sodium channel protein type 5 subunit alpha                        |
| <i>SGCA</i>    | Alpha-sarcoglycan                                                  |
| <i>SGCB</i>    | Beta-sarcoglycan                                                   |
| <i>SGCD</i>    | Delta-sarcoglycan                                                  |
| <i>SHOC2</i>   | Leucine-rich repeat protein SHOC-2                                 |
| <i>SKI</i>     | Ski oncogene                                                       |
| <i>SLC22A5</i> | Solute carrier family 22 member 5                                  |
| <i>SLC25A4</i> | ADP/ATP translocase 1                                              |
| <i>SLC2A10</i> | Solute carrier family 2, facilitated glucose transporter member 10 |
| <i>SLMAP</i>   | Sarcolemmal membrane-associated protein                            |
| <i>SMAD1</i>   | Mothers against decapentaplegic homolog 1                          |
| <i>SMAD3</i>   | Mothers against decapentaplegic homolog 3                          |
| <i>SMAD4</i>   | Mothers against decapentaplegic homolog 4                          |
| <i>SMAD9</i>   | Mothers against decapentaplegic homolog 9                          |
| <i>SNTA1</i>   | Alpha-1-syntrophin                                                 |
| <i>SOS1</i>    | Son of sevenless homolog 1                                         |
| <i>SPRED1</i>  | Sprouty-related, EVH1 domain-containing protein 1                  |
| <i>SURF1</i>   | Surfeit locus protein 1                                            |
| <i>TAZ</i>     | Tafazzin                                                           |
| <i>TBX1</i>    | T-box transcription factor TBX1                                    |
| <i>TBX20</i>   | T-box transcription factor TBX20                                   |
| <i>TBX5</i>    | T-box transcription factor TBX5                                    |
| <i>TCAP</i>    | Telethonin                                                         |
| <i>TGFB2</i>   | Transforming growth factor beta-2                                  |
| <i>TGFB3</i>   | Transforming growth factor, beta 3                                 |
| <i>TGFBR1</i>  | TGF-beta receptor type-1                                           |

|                      |                                                                  |
|----------------------|------------------------------------------------------------------|
| <i>TGFR2</i>         | TGF-beta receptor type-2                                         |
| <i>TMEM43</i>        | Transmembrane protein 43                                         |
| <i>TMEM70</i>        | Transmembrane protein 70, mitochondrial                          |
| <i>TMPO</i>          | Thymopoietin                                                     |
| <b><i>TNNC1</i></b>  | <b>Troponin C, slow skeletal and cardiac muscles **</b>          |
| <b><i>TNNI3</i></b>  | <b>Troponin I, cardiac muscle **</b>                             |
| <b><i>TNNT2</i></b>  | <b>Troponin T, cardiac muscle **</b>                             |
| <b><i>TPM1</i></b>   | <b>Tropomyosin alpha-1 chain **</b>                              |
| <i>TRDN</i>          | Triadin                                                          |
| <b><i>TRIM63</i></b> | <b>E3 ubiquitin-protein ligase TRIM63 **</b>                     |
| <i>TRPM4</i>         | Transient receptor potential cation channel subfamily M member 4 |
| <i>TSFM</i>          | Elongation factor Ts, mitochondria                               |
| <i>TTN</i>           | Titin                                                            |
| <b><i>TTR</i></b>    | <b>Transthyretin **</b>                                          |
| <i>TXNRD2</i>        | Thioredoxin reductase 2, mitochondrial                           |
| <i>VCL</i>           | Vinculin                                                         |

\*\* The genes considered priority for HCM are indicated in bold (n = 18).



## Table 2 of the supplementary data

TPM1 p.Arg21Leu study population

| Total individuals                                                                     |           | n = 226 |
|---------------------------------------------------------------------------------------|-----------|---------|
| 1. Carriers                                                                           |           | 83      |
| Male                                                                                  | 42 (50.6) |         |
| Female                                                                                | 41 (49.4) |         |
| 1.a: Carriers with clinical data                                                      |           | 67      |
| 1.b: Carriers without clinical data                                                   |           | 2       |
| 1.c: Obligate simple heterozygous carriers without clinical data                      |           | 14      |
| 2. Patients reported as hypertrophic cardiomyopathy without clinical and genetic data |           | 13      |
| 3. Noncarriers with clinical data                                                     |           | 24      |
| 4. First-degree relatives without clinical or genetic evaluation                      |           | 106     |
| 5. Families                                                                           |           |         |
| 5.a: Pedigrees                                                                        |           | 27      |
| 5.b: Index cases **                                                                   |           | 31      |

|                                                                                 |            |
|---------------------------------------------------------------------------------|------------|
| <i>5.c: No. carriers/family</i>                                                 | <i>2.7</i> |
| <i>5.d: Pedigrees with affected carriers in <math>\geq 2</math> generations</i> | <i>12</i>  |

---

The data are presented as absolute numbers or No. (%).

\*\* Four index cases were reported without pedigree data.

Revista Española de Cardiología

Lamounier Junior A, et al. Genotype-phenotype correlations in hypertrophic cardiomyopathy:  
a multicenter study in Portugal and Spain of the TPM1 p.Arg21Leu variant

Table 3 of the supplementary data

Clinical features of the TPM1 p.Arg21Leu carriers diagnosed under the age of 35 years (n = 12)

| Pedi<br>gree | Id   | Sex | Second<br>variant | Index<br>case | Phenoty<br>pe   | Age<br>at<br>Dx | Age | NY<br>HA | AF | FHSD | Max<br>LVH | TV<br>/<br>FV | Syncope | Abn<br>BP<br>Resp | LVOTO<br>(Peak<br>grad) | LV<br>Dysf<br>(EF) | Events | Additional<br>features                                                 | Others                                           | SCD<br>risk |
|--------------|------|-----|-------------------|---------------|-----------------|-----------------|-----|----------|----|------|------------|---------------|---------|-------------------|-------------------------|--------------------|--------|------------------------------------------------------------------------|--------------------------------------------------|-------------|
| #3           | IV.1 | M   | No                | No            | HCM<br>atypical | 18              | 27  | I        | -  | -    | 33         | -             | -       | -                 | -                       | -                  | -      | Echo: LA 40<br>mm.                                                     | Competiti<br>ve athlete<br>– football            | 2.92        |
| #6           | IV.1 | M   |                   | Yes           | HCM<br>septal   | 15              | 22  | II       | -  | +    | 39         | +             | -       | -                 | +(35<br>exerc)          | -                  | -      | Holter: 1<br>episode NSVT<br>(8 complex)<br><br>MNR: LGE 3<br>segments | Competiti<br>ve athlete<br>- football<br><br>ICD | 6.37        |
| #7           | IV.2 | M   | No                | No            | HCM<br>septal   | 26              | 35  | I        | -  | +    | 14         | -             | -       | -                 | -                       | -                  | -      |                                                                        | Competiti<br>ve athlete<br>– football            | 2.48        |
| #11          | V.1  | M   | No                | No            | HCM<br>septal   | 17              | 28  | I        | -  | -    | 22         | -             | -       | -                 | -                       | -                  | -      | Echo: LA 46<br>mm<br>ECG:<br>negative T<br>waves, high<br>QRS voltages |                                                  | 3.29        |

|     |      |   |                     |     |            |    |    |     |   |   |    |   |   |   |        |   |   |                                                                                                              |                                    |      |
|-----|------|---|---------------------|-----|------------|----|----|-----|---|---|----|---|---|---|--------|---|---|--------------------------------------------------------------------------------------------------------------|------------------------------------|------|
| #13 | II.3 | M | No                  | Yes | HCM septal | 30 | 44 | I   | - | - | 18 | - | - | + | +(60)  | - | - | Echo: LA 40 mm, diastolic dysfunction I. ECG: pathologic Q wave, abnormal repolarization, high QRS voltages. |                                    | 2.24 |
| #17 | II.1 | M | MYH7 Lys351 Asn (?) | Yes | HCM septal | 33 | 36 | I   | - | - | 16 | - | - | - | -      | - | - | Echo: LA 42 mm ECG: normal                                                                                   |                                    | 2.00 |
| #18 |      | M | No                  | Yes | HCM septal | 13 | 32 | III | - | - | 51 | - | + | + | +(140) | - | - | Echo: LA 47 mm, RA enlarged, severe mitral regurgitation, SAM. Wave S < 8 (tissue Doppler)                   | Myectomy.<br>ICD                   | 9.94 |
| #19 | II.1 | M | No                  | Yes | HCM septal | 33 | 47 | I   | - | - | 23 | + | - | - | -      | - | - | ECG: first-degree AVB, High QRS Voltage                                                                      | Primary prevention – ICD implanted | 4.59 |
| #20 | II.2 | M | No                  | Yes | HCM septal | 11 | 17 | I   | - | - | 17 | - | - | - | -      | - | - |                                                                                                              |                                    | 2.43 |
| #25 | II.3 | M | No                  | Yes | HCM septal | 26 | 28 | I   | - | - | 32 | + | - | - | -      | - | - | Echo: LA 35 mm                                                                                               | Treacher-Collins syndrome          | 5.86 |
| #26 | II.1 | M | No                  | Yes | HCM septal | 20 | 23 | I   | - | - | 26 | - | - | - | -      | - | - | MRI: LGE 2 segments, LA 41 mm                                                                                | Competitive athlete – football     | 3.46 |

|     |      |   |    |     |            |    |    |    |   |   |      |   |   |   |       |   |   |                                    |          |      |
|-----|------|---|----|-----|------------|----|----|----|---|---|------|---|---|---|-------|---|---|------------------------------------|----------|------|
| #29 | II.3 | F | No | Yes | HCM septal | 15 | 24 | II | - | + | 33.5 | - | - | - | +(90) | - | - | MRI: LGE in all segments, LA 32 mm | Myectomy | 5.35 |
|-----|------|---|----|-----|------------|----|----|----|---|---|------|---|---|---|-------|---|---|------------------------------------|----------|------|

Abn BP resp, abnormal blood pressure response on exercise; AF, atrial fibrillation; AVB, atrioventricular block; Dx, diagnosis; ECG, electrocardiogram; Echo, echocardiogram; FHSD, family history of sudden death; HCM, hypertrophic cardiomyopathy; ICD, implanted cardioverter-defibrillator; Id, individual; LA, left atrium; LGE, late gadolinium enhancement; LVH, left ventricular hypertrophy; LVOTO (peak grad); left ventricle outflow tract obstruction (gradient in mmHg); LV dysf (EF), systolic dysfunction (ejection fraction); max LVH, left ventricular hypertrophy (maximal ventricular wall thickness in mm); MRI, magnetic resonance imaging; NYHA, New York Heart Association functional class; NSVT, nonsustained ventricular tachycardia; SAM, systolic anterior motion; SCD, sudden cardiac death; VT/VF, ventricular tachycardia/ventricular fibrillation.

Table 4 of the supplementary data

Major and nonmajor adverse cardiovascular events reported in the TPM1 p.Arg21Leu pedigrees

| Individual                                     | Major cardiovascular events (age) | Observations                              |
|------------------------------------------------|-----------------------------------|-------------------------------------------|
| Carriers                                       |                                   |                                           |
| 1. Male                                        | Sudden death (55 y)               | No left ventricular hypertrophy (autopsy) |
| 2. Male                                        | Heart transplant (48 y)           |                                           |
| 3. Female                                      | Heart failure death (68 y)        | Systemic sclerosis (pulmonary fibrosis)   |
| 4. Obligate carrier, female                    | Unspecified cardiac death (79 y)  | Unavailable clinical data                 |
| First-degree relatives without genetic testing |                                   |                                           |
| 5. Male                                        | Sudden death (58 y)               | Unknown genetic status                    |
| 6. Male                                        | Sudden death (40 y)               | Unknown genetic status                    |

|                                                        |                                   |                                                                                                    |
|--------------------------------------------------------|-----------------------------------|----------------------------------------------------------------------------------------------------|
|                                                        |                                   | Additional familial genetic variant <i>TPM1</i> p.Met281Val – pathogenic                           |
| 7. Female                                              | Sudden death (19 y)               | Unknown genetic status<br>Additional familial genetic variant <i>MYH7</i> p.Gly741Arg – pathogenic |
| 8. Male                                                | Stroke-related death (64 y)       | Unknown genetic status                                                                             |
| 9. Female                                              | Heart failure death (58 y)        | Unknown genetic status                                                                             |
| 10. Female                                             | Stroke-related death (36 y)       | Unknown genetic status                                                                             |
| 11. Female                                             | Unspecified cardiac death (49 y)  | Unknown genetic status<br>Valvular heart disease                                                   |
| 12. Male                                               | Unspecified cardiac death (>65 y) | Unknown genetic status                                                                             |
| <i>Second-degree relatives without genetic testing</i> |                                   |                                                                                                    |
| 13. Male                                               | Sudden death (21 y)               | Unknown genetic status. Sudden cardiac death during military exercise                              |
| 14. Male                                               | Sudden death (40 y)               | Unknown genetic status                                                                             |
| 15. Male                                               | Heart failure death (40 y)        | Unknown genetic status                                                                             |
| 16. Male                                               | Unspecified cardiac death (>56 y) | Unknown genetic status                                                                             |
| <b>Nonmajor adverse cardiovascular events (age) **</b> |                                   |                                                                                                    |
| <i>Carriers</i>                                        |                                   |                                                                                                    |
| 1. Female                                              | Septal myectomy (23 y)            | Echo 33.5 mm                                                                                       |
| 2. Male                                                | Septal myectomy (32 y)            | Echo 51 mm                                                                                         |
| 3. Female                                              | Mitral valve replacement (41 y)   | Systolic anterior motion of mitral valve                                                           |
| 4. Male                                                | Nonfatal stroke (65 y)            |                                                                                                    |
| 5. Female                                              | Nonfatal stroke (73 y)            |                                                                                                    |

[\*\*] Nonmajor adverse cardiovascular events were not included in the survival curves.



Clinical features of homozygous TPM1 p.Arg21Leu carriers (n = 4)

| Pedigree | Id   | Sex    | Age at Dx | Age, y | Additional variant | Max wall thickness               | Diastolic dysfunction | Left atrium | LVOTO             | Ventricular arrhythmias | LGE       | SCD risk |
|----------|------|--------|-----------|--------|--------------------|----------------------------------|-----------------------|-------------|-------------------|-------------------------|-----------|----------|
| #1       | II.3 | Male   | 71        | 75     | No                 | 22 mm, asymmetric septal         | II                    | 48          | 120 mmHg exercise | NSVT                    | NR        | 3.85     |
| #10      | II.6 | Female | 67        | 70     | No                 | 17 mm, apical                    | II                    | 46          | 118 mmHg at rest  | Rare EVB                | NR        | 3.04     |
| #10      | II.7 | Female | 61        | 68     | MYBPC3 p.Asp75Asn  | 28 mm, apical. Biventricular LVH | Restrictive           | 54          | No                | NSVT                    | Extensive | 4.08     |
| #13      | II.2 | Male   | 40        | 48     | No                 | 22 mm, asymmetric septal         | II                    | 45          | 40 mmHg at rest   | No                      | NR        | 2.56     |

EVB, ectopic ventricular beats; Dx, diagnosis; LGE, late gadolinium enhancement; LVH, left ventricular hypertrophy; LVOTO, left ventricle outflow tract obstruction;

MRI, cardiac magnetic resonance; NSVT, nonsustained ventricular tachycardia; NR, not reported; SCD, sudden cardiac death.



[illegible]

|     |       |   |                      |                 |     |    |        |   |   |    |   |   |   |        |   |                                                                                                                                                                                       |                                               |      |
|-----|-------|---|----------------------|-----------------|-----|----|--------|---|---|----|---|---|---|--------|---|---------------------------------------------------------------------------------------------------------------------------------------------------------------------------------------|-----------------------------------------------|------|
| #10 | II.7  | F | MYBPC3<br>p.Asp75Asn | HCM<br>Apical   | <61 | 68 | III    | - | - | 28 | + | - | - | -      | - | Holter: NSVT<br>MRI: LA 54 mm,<br>restrictive<br>pattern,<br>biventricular<br>hypertrophy<br>and LGE<br>(subepicardial,<br>medium mural,<br>RV and apical).<br>Apical<br>hypokinesis. | Homozygous<br>p.Arg21Leu                      | 4.8  |
| #15 | III.5 | F | MYL3<br>p.Met173Val  | HCM<br>septal   | 43  | 45 | II     | - | - | 15 | - | - | - | +(30)  | - | MNR: Mild LGE<br>in 2 segments                                                                                                                                                        | SAH                                           | 1.48 |
| #15 | II.3  | M | MYL3<br>p.Met173Val  | HCM<br>reported | ?   | 75 | ?      | ? | ? | +  | ? | ? | ? | ?      | ? | ?                                                                                                                                                                                     | Patients were<br>evaluated in<br>other center | -    |
| #17 | II.1  | M | MYH7<br>p.Lys351Asn  | HCM<br>septal   | 33  | 36 | I      | - | - | 16 | - | - | - | -      | - | Echo: LA 42 mm                                                                                                                                                                        | Mild<br>SAH                                   | 2.0  |
| #23 | II.2  | F | MYH7<br>p.Leu1333Val | HCM<br>apical   | 61  | 63 | I      | - | - | 15 | - | - | - | -      | - |                                                                                                                                                                                       |                                               | 0.87 |
| #28 |       | M | MYH7<br>p.Tyr582Cys  | HCM<br>septal   | 56  | 57 | II-III | - | - | 17 | - | - | - | +(110) | - | MRI: No LGE, LA<br>45 mm                                                                                                                                                              |                                               | 2.39 |
| #30 | II.2  | M | TPM1<br>p.Met281Val  | HCM<br>septal   | 39  | 56 | I      | - | + | 23 | + | - | - | -      | - | MRI: LGE >3<br>segments                                                                                                                                                               |                                               | 4.71 |

|  |  |  |  |  |  |  |  |  |  |  |  |  |  |  |  |  |                      |  |  |
|--|--|--|--|--|--|--|--|--|--|--|--|--|--|--|--|--|----------------------|--|--|
|  |  |  |  |  |  |  |  |  |  |  |  |  |  |  |  |  | Holter: NSVT 3 beats |  |  |
|--|--|--|--|--|--|--|--|--|--|--|--|--|--|--|--|--|----------------------|--|--|

Abn BP resp, abnormal blood pressure response on exercise; AF, atrial fibrillation; Dx, diagnosis; ECG, electrocardiogram; Echo, echocardiogram; FHSD, family history of sudden death; HCM, hypertrophic cardiomyopathy; ICD, implanted cardiofibrillator; Id, individual; LA, left atrium; LGE, late gadolinium enhancement; LVH, left ventricular hypertrophy; LVOTO (peak grad), left ventricular outflow tract obstruction (gradient in mmHg); LV dysf (EF), systolic dysfunction (ejection fraction); Max LVH, left ventricular hypertrophy (maximal ventricular wall thickness in mm); MRI, magnetic resonance imaging; NYHA, New York Heart Association functional class; NSVT, nonsustained ventricular tachycardia; SAM, systolic anterior motion; SCD, sudden cardiac death; VT/VF, ventricular tachycardia/ventricular fibrillation.

Comments regarding disease expression of each patient and the pathogenicity of the additional genetic variant are briefly described below:

- **Pedigree #3:** The single p.Arg21Leu carrier (III.3) with the additional variant (*MYH7* p.Thr1019Asn) in this family was unaffected at age 51 years. Both variants have been described as having late/incomplete penetrance.

We consider that ***MYH7* p.Thr1019Asn** is a likely rare pathogenic variant (present in 4 heterozygous carriers in the gnomAD database). It has been reported in the literature in a French family of African descent, in which 4 carriers had dilated cardiomyopathy and 5 carriers were unaffected. In our center, we identified it in some DCM cases, but mainly in multiple HCM patients. In some cases, the variant was identified in association with another sarcomere variant, as in this family.

- **Pedigree #9:** Individuals II.1, II.3 and I.2 were carriers of a pathogenic *TNNT2* variant, and expressed relatively mild phenotypes

We consider ***TNNT2* p.Arg278Cys** as a pathogenic HCM-associated variant. It has been identified in more than 220 carriers from >130 families. The variant appears to be associated with late/incomplete penetrance and mild-moderate hypertrophies. This incomplete penetrance explains the presence of this variant in a relevant number of individuals in control populations (98 heterozygous carriers in the gnomAD database). Other 3 missense variants affecting the same amino acid p.Arg278Pro/Leu/His have been also identified in multiple HCM patients with a similar clinical profile. Among the families carrying variants in Arg278, we have reported 9 sudden deaths in carriers and 17 sudden deaths in first/second-degrees relatives without genetic testing.

- **Pedigree #10:** *TPM1* p.Arg21Leu homozygous sisters (II.7 and II.6) showed severe phenotypes, although diagnosed at advanced ages (see: *Pedigree #10*). The homozygous carrier II.7 had a more marked phenotype that may be related to the presence of an additional likely pathogenic variant in *MYBPC3*. On the other hand, his 42-year-old daughter (III.6), clinically unaffected, was a double heterozygous carrier of *TPM1* p.Arg21Leu and *MYBPC3* p.Asp75Asn variants.

We consider ***MYBPC3* p.Asp75Asn** as a likely rare pathogenic variant (4 carriers in the gnomAD database). This variant has been identified in several HCM index cases, and familial studies showed the presence of both affected and unaffected carriers, suggesting late/incomplete penetrance.

- **Pedigree #15:** There are 2 carriers with complex genotype in this pedigree, but individual II.3 was studied in another center and no clinical details could be obtained.

We consider ***MYL3* p.Met173Val** as a likely pathogenic variant that has been associated with the development of hypertrophic cardiomyopathy (28 carriers from 14 families –half of them either unaffected or with unknown phenotype; so, familial cosegregation has not been clearly documented). It is present in

a single individual from the gnomAD database (control). A functional study suggesting a damaging effect has been published. Data suggest that this variant could be associated with late disease onset and incomplete penetrance.

- **Pedigree #17:** The young age at diagnosis of this carrier (II.1) could be related to the presence of the *MYH7* variant; however, he did not have a severe phenotype.

We consider ***MYH7* p.Lys351Asn** as a variant of unknown clinical significance. It has been described to date in this single HCM-patient, and also in a single carrier from the gnomAD population (control). Two missense variants located at the same amino acid (p.Lys351Glu/Thr) have been identified in HCM cases (6 unrelated carriers).

- **Pedigree #23:** Patient II.2, with a mild phenotype, carried an additional *MYH7* variant of uncertain significance.

We consider ***MYH7* p.Leu1333Val** to be a variant of unknown clinical significance. This is the third HCM index case that we have identified with the variant, and we have identified it in another index case with DCM phenotype. It has been reported in 4 heterozygous individuals from the gnomAD database. These data could suggest a late/incomplete penetrance for the variant, but its pathogenicity is still uncertain.

- **Pedigree #28:** Carrier of an additional variant of uncertain significance in *MYH7* with mild phenotype and low SCD risk. No myocardial fibrosis on MRI.

We consider ***MYH7* p.Tyr582Cys** to be a variant of unknown clinical significance. It has been identified only in this single patient to date. The variant is absent in control populations. It is located within a protein domain in which many other variants have been associated with HCM.

- **Pedigree #30:** Two pathogenic variants in *TPM1* were identified in this family. Only the individual II.2 carried both variants. Compared to his brother (II.1), who carried only *TPM1* p.Met281Val, the clinical expression of the index case was more severe and could suggest a synergic effect of the 2 variants. The paternal uncle (I.1) had a sudden death at 40 years of age; we cannot determine if he had only one of the family's variants or both.

We consider ***TPM1* p.Met281Val** to be a rare pathogenic variant (8 individuals in gnomAD). This variant has been identified in at least 25 HCM-pedigrees (30 affected carriers and 8 unaffected relatives). Familial cosegregation has been documented in at least 1 large family. Clinical data of the carriers suggest late/incomplete penetrance (only 5 carries have been diagnosed under the age of 45 years). Another rare variant affecting the same amino acid (p.Met281Thr) has been identified in 5 HCM patients (from 4 pedigrees).

Table 7 of the supplementary data

Criteria for classifying *TPM1* p.Arg21Leu pathogenicity

| Criteria*                                                                                                                       | Description                                                                                                                                                                                                                                                                                                                                                                                                                                                                                                                                       | References ** |
|---------------------------------------------------------------------------------------------------------------------------------|---------------------------------------------------------------------------------------------------------------------------------------------------------------------------------------------------------------------------------------------------------------------------------------------------------------------------------------------------------------------------------------------------------------------------------------------------------------------------------------------------------------------------------------------------|---------------|
| (PS4) The prevalence of the variant in affected individuals is significantly increased compared with the prevalence in controls | <ul style="list-style-type: none"><li>• <i>TPM1</i> p.Arg21Leu present in 23/4099 (0.56%) hypertrophic cardiomyopathy probands, including 4 homozygous carriers. It was not present in 6462 patients (controls) sequenced with other inherited cardiac disorders in the same period (<math>P &lt; .0001</math>)</li><li>• The variant is listed in simple heterozygosity in 10/62784 (0.015%) individuals from the TOPMed program, and 5/120,158 individuals (0.004%) (age range 55-65 y) from the gnomAD database (non-TOPMed samples)</li></ul> | This study    |

|                                                                                                                                                   |                                                                                                                                                                                                                                                                                                                                                                                                                                                                                                                                                                                                                                                                                                                                                                                                                                                                                                                                                                                                |                         |
|---------------------------------------------------------------------------------------------------------------------------------------------------|------------------------------------------------------------------------------------------------------------------------------------------------------------------------------------------------------------------------------------------------------------------------------------------------------------------------------------------------------------------------------------------------------------------------------------------------------------------------------------------------------------------------------------------------------------------------------------------------------------------------------------------------------------------------------------------------------------------------------------------------------------------------------------------------------------------------------------------------------------------------------------------------------------------------------------------------------------------------------------------------|-------------------------|
| (PP1) Cosegregation with disease in multiple affected family members in a gene definitively known to cause the disease                            | <ul style="list-style-type: none"> <li>Combined LOD score = 3.95</li> </ul>                                                                                                                                                                                                                                                                                                                                                                                                                                                                                                                                                                                                                                                                                                                                                                                                                                                                                                                    | This study              |
| (PP2) Missense variant in a gene that has a low rate of benign missense variation and in which missense variants are common mechanisms of disease | <ul style="list-style-type: none"> <li>TPM1 gene Z = 2.87</li> </ul>                                                                                                                                                                                                                                                                                                                                                                                                                                                                                                                                                                                                                                                                                                                                                                                                                                                                                                                           | the gnomAD database, 13 |
| (PP3) Multiple lines of computational evidence supporting a deleterious effect                                                                    | <ul style="list-style-type: none"> <li>Polyphen-2, MutationTaster, FATHMM, DANN</li> </ul>                                                                                                                                                                                                                                                                                                                                                                                                                                                                                                                                                                                                                                                                                                                                                                                                                                                                                                     | In silico predictors    |
| (PM5) Novel missense change at an amino acid residue where a different missense change determined to be pathogenic has been previously seen       | <ul style="list-style-type: none"> <li>p.Arg21His was identified in a single hypertrophic cardiomyopathy index case</li> <li>In vitro functional evidence supporting a damaging effect caused by p.Arg21His</li> </ul>                                                                                                                                                                                                                                                                                                                                                                                                                                                                                                                                                                                                                                                                                                                                                                         | 1,2                     |
| (PM1) Located in a critical and well-established functional domain (N-terminal amino acids 1-25)                                                  | <p>TPM1 variants: p.Met8Arg, p.Gln9Lys/His/Leu, p.Lys15Asn/Glu/Arg, p.Glu16Gln, p.Asp20Asn, p.Ala22Thr, p.Glu23Gln, and p.Ala25Thr have been reported in multiple affected carriers (16 HCM and 8 DCM-patients) vs only p.Asn17Lys and p.Arg21Leu, p.Ala22Thr in the general population (gnomAD). [see figure 3 of the supplementary data]</p> <p>In vitro functional assays:</p> <ol style="list-style-type: none"> <li>1) Disruption of the coiled coil structure in residues 15–22 N-terminal. Lys15, Ala18 and Ala22 and those of their coiled coil mates were critical for stability of N:C-terminal junction. Salt bridges and H-bonds, including Asp-20, Arg-21, Gln-24, and Glu-26, reinforce the close interhelix packing. N-terminal region of tropomyosin is necessary for stable binding to actin filaments</li> <li>2) p.Met8Arg and p.Lys15Asn cause changes to various properties of TPM1 molecules, disrupting the interaction with F-actin. In vitro data obtained</li> </ol> | 2-12                    |

|  |                                                                                                                                                                                                                                                                                                                                                                                                                                                                                                                      |  |
|--|----------------------------------------------------------------------------------------------------------------------------------------------------------------------------------------------------------------------------------------------------------------------------------------------------------------------------------------------------------------------------------------------------------------------------------------------------------------------------------------------------------------------|--|
|  | <p>point out that the N-terminal variants are more crucial for the head-to-tail interaction than those in the C-terminus</p> <p>3) 1-21 N-terminal residues of tropomyosin are involved in interactions with leiomodín protein (actin-binding capsular protein). p.Lys15Asn reduces binding affinity for both leiomodín and tropomodulin, which are responsible for correct lengths of thin filaments</p> <p>4) An intact coiled coil at the N-terminus of the <i>TPM1</i> is essential for tropomodulin binding</p> |  |
|--|----------------------------------------------------------------------------------------------------------------------------------------------------------------------------------------------------------------------------------------------------------------------------------------------------------------------------------------------------------------------------------------------------------------------------------------------------------------------------------------------------------------------|--|

[\*] American College of Medical Genetics Criteria for interpretation of sequenced variants.

[\*\*] See references at the end of the supplementary data.



**Figure 1 of the supplementary data.**

Carriers with clinical data (n = 67) by age and phenotype severity\*

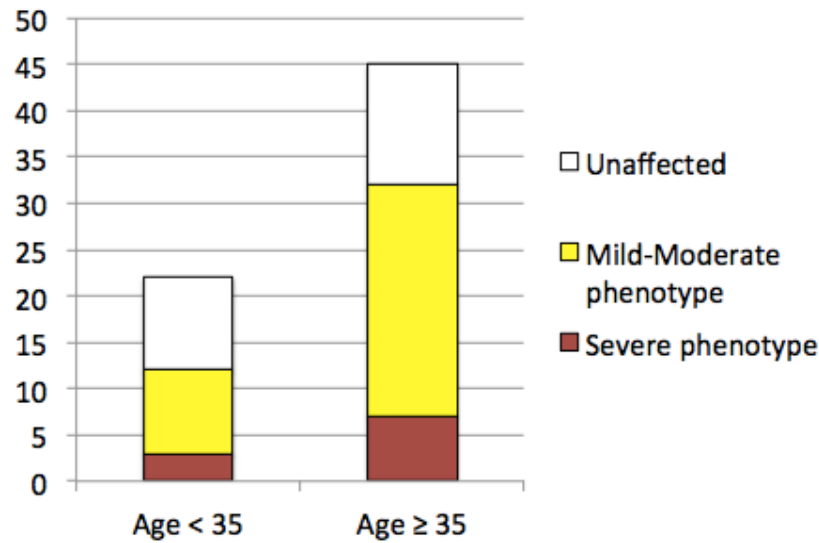

(\*) **Severe phenotype criteria:** *TPM1* p.Arg21Leu carriers who experienced a major cardiovascular event or those at high sudden cardiac death risk.

**Figure 2 of the supplementary data.**

Maximum left ventricular wall thickness (in mm) by sex, genotype and age at the last follow up in *TPM1* p.Arg21Leu affected carriers.

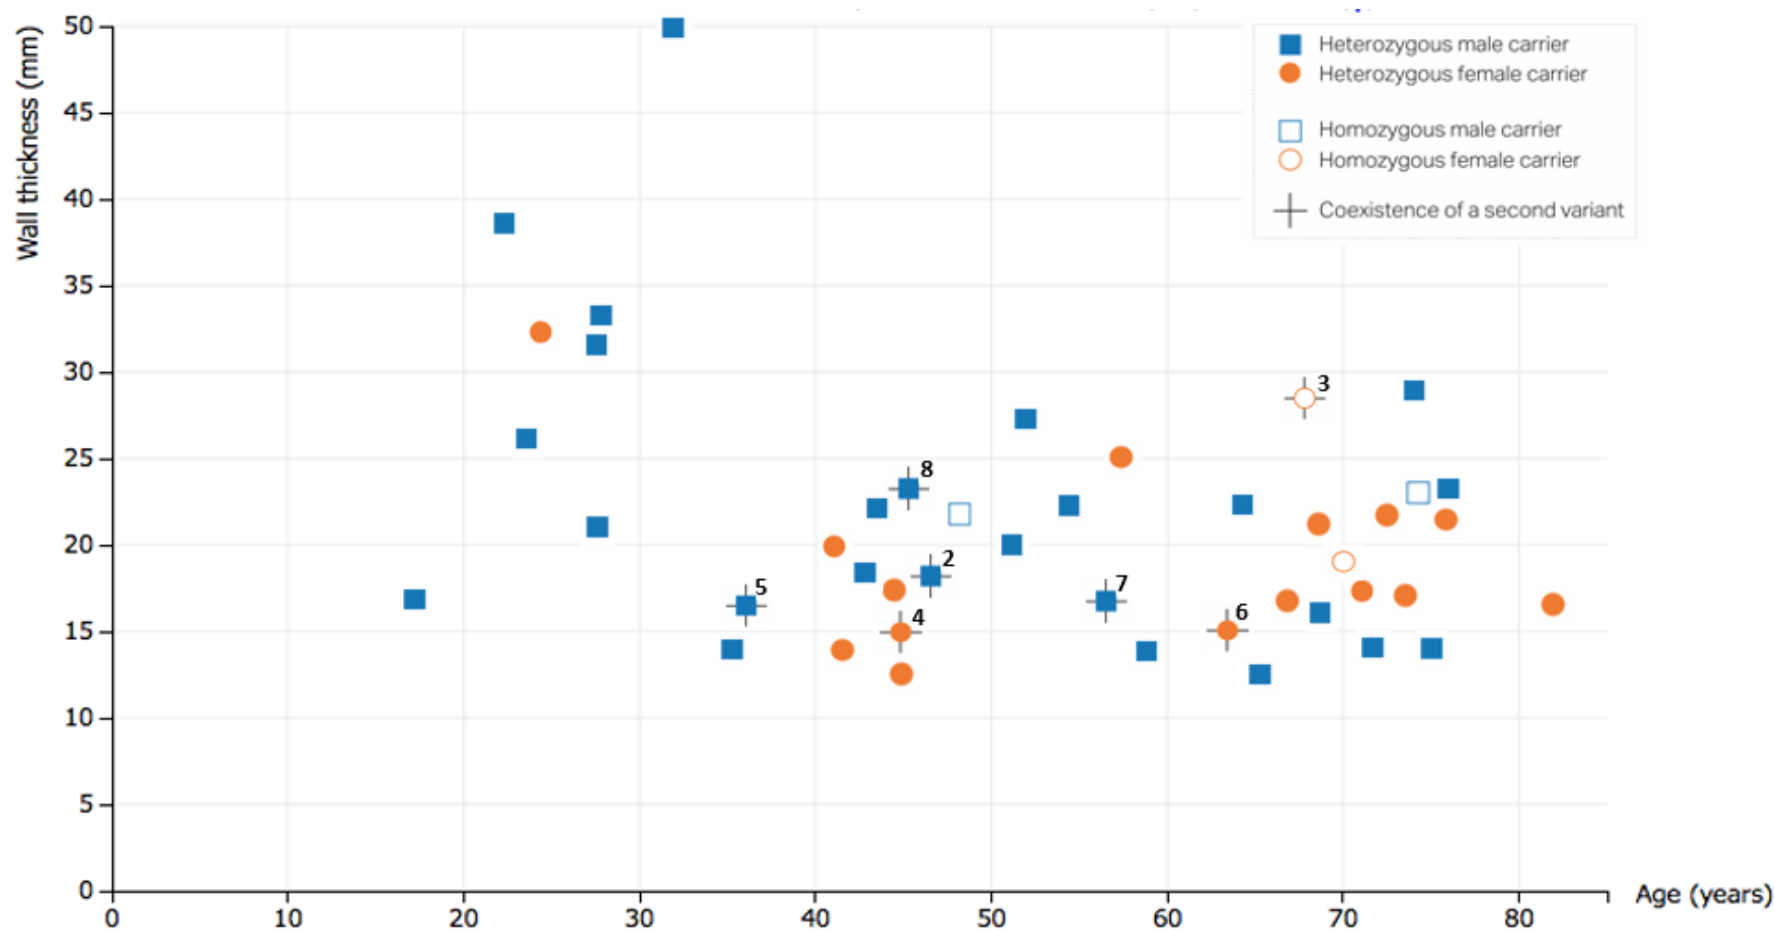

**Numbers detail the genotype:** 2. *TNNT2* p.Arg278Cys (+++); 3. *MYBPC3* p.Asp75Asn (+?); 4. *MYL3* p.Met173Val (+?); 5. *MYH7* p.Lys351Asn (?); 6. *MYH7* p.Leu1333Val (?); 7. *MYH7* p.Tyr582Cys (?); 8. *TPM1* p.Met281Val (+++). (++) indicates a pathogenic variant, (+?) likely pathogenic variant, and (?) variant of unknown clinical significance.

### **Figure 3 of the supplementary data**

*TPM1* p.Arg21Leu sudden cardiac death risk scores (ESC calculator) by sex, genotype and age at the last follow up.

*Revista Española de Cardiología*  
*Lamounier Junior A, et al. Genotype-phenotype correlations in hypertrophic cardiomyopathy:*  
*a multicenter study in Portugal and Spain of the TPM1 p.Arg21Leu variant*

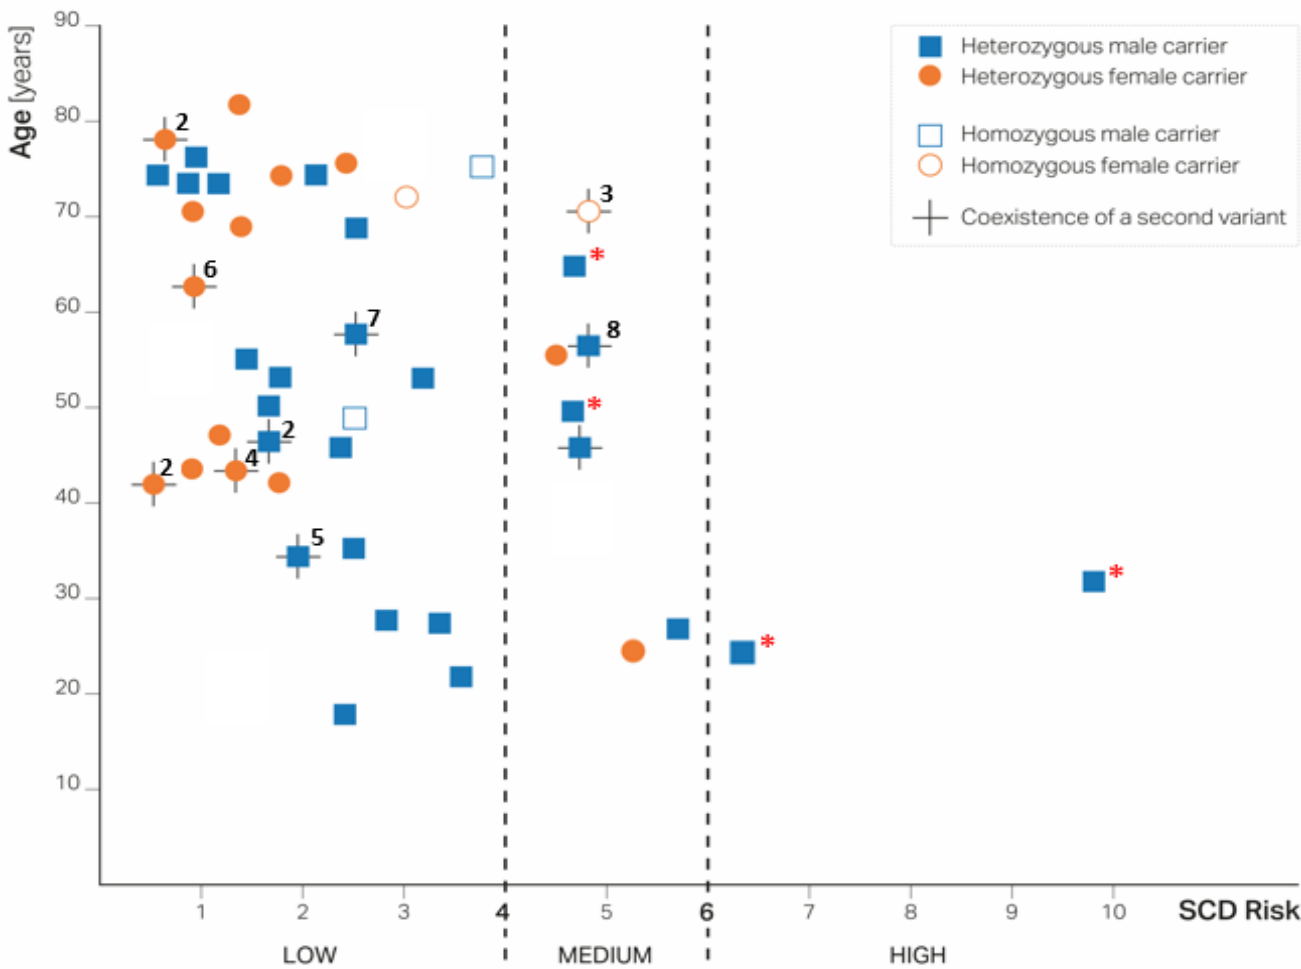

Numbers detail the genotype: see page above. (\*) Red asterisks: carriers with ICD.

**Figure 4 of the supplementary data.**

N-terminal: C-terminal overlapping junction between 2 subsequent  $\alpha$ Tpm.1.

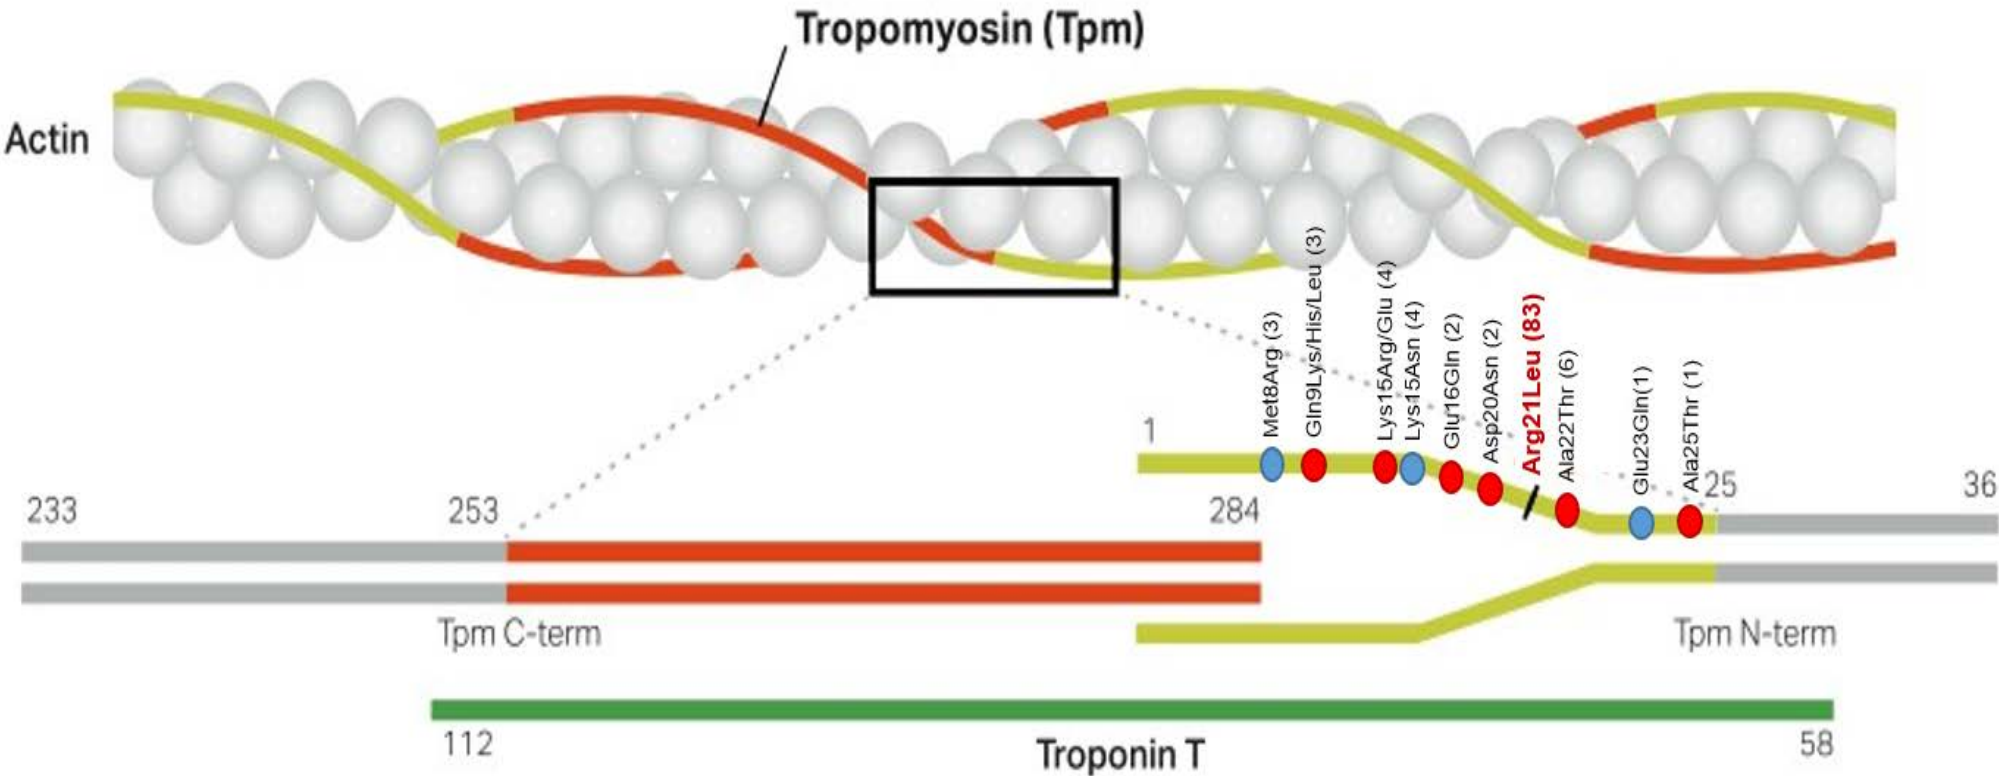

At the top:  $\alpha$ Tpm.1 molecules across the actin groove (one tropomyosin is represented in yellow, and the subsequent one in orange), with the N-terminal:C-terminal junction highlighted with a black rectangle. Below: The junction has been also reported as tail-head overlapping region; 1-25 amino acids in the N-terminal region participating in the junction, including Arg21Leu. HCM-related variants are shown in red circles, and DCM-variants in blue circles (n = number of carriers).

The junction is one of the 2  $\alpha$ Tpm.1 binding-sites with troponin T (in green). Figure drawn by the authors with data from Murakami K, Stewart M, nozawa K et al.

Structural basis for tropomyosin overlap in thin (actin) filaments and the generation of a molecular swivel by troponin T. Proc Natl Acad Sci U S A. 2008;105:7200-7205.

TPM1 p.Arg21Leu pedigrees

31 index cases:

27 pedigrees

12 pedigrees with LOD score calculated

Legends:

|                                                                                     |                                                                                     |                                                                                     |                                                                                       |                                                                                       |                                 |
|-------------------------------------------------------------------------------------|-------------------------------------------------------------------------------------|-------------------------------------------------------------------------------------|---------------------------------------------------------------------------------------|---------------------------------------------------------------------------------------|---------------------------------|
|    | Narrow indicates the <b>Proband</b> or index case                                   |  |    | Normal male/female—clinically evaluated                                               |                                 |
|  |  | Square indicates male/circle indicates female                                       |  |  | Deceased male/female individual |
|  |  | HCM affected male/female carrier                                                    | * <b>Obligate carrier</b> is described below of the individual.                       |                                                                                       |                                 |
|  |  | Unaffected (?) male/female carrier-with only minor ECG/Echo changes                 | <b>NCE</b>                                                                            | No clinical evaluation                                                                |                                 |
|                                                                                     |                                                                                     |                                                                                     | <b>NGT</b>                                                                            | No genetic testing                                                                    |                                 |



*Revista Española de Cardiología*  
*Lamounier Junior A, et al. Genotype-phenotype correlations in hypertrophic cardiomyopathy:*  
*a multicenter study in Portugal and Spain of the TPM1 p.Arg21Leu variant*

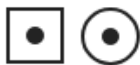

Unaffected male/female carrier

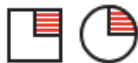

Presence of a second genetic disorder in a male/female individual

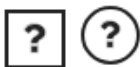

Male individual with strong suspicious of HCM/female individual or clinical data not reported

**Pedigree #1**

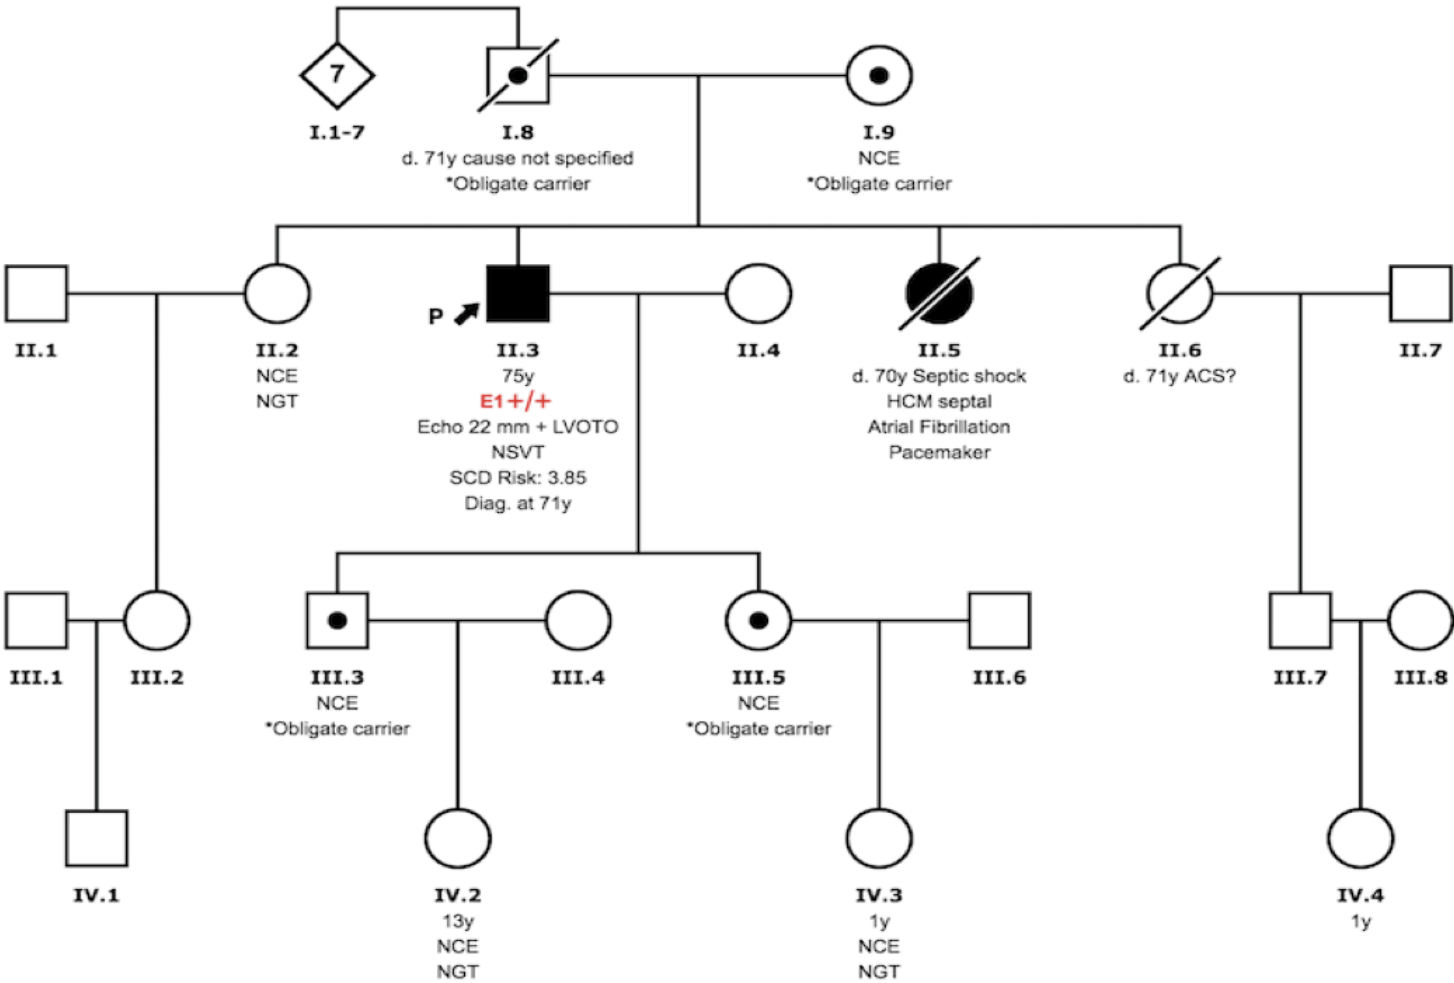

**E1** TPM1 (g.63335090G>T, c.62G>T, p.Arg21Leu)

"+/+" = Homozygous, "-/+ " = Heterozygous, "+ " = Hemizygous, "-/- " = Not found, "- " = Not found

| Id    | Sex | TPM1<br>Arg21Leu    | Other<br>mutat | Phenotyp<br>e | Age at<br>Dx | Age<br>, y | NY<br>HA | AF | FHSD | Max<br>LVH | TV/<br>FV | Synco<br>pe | Abn<br>BP<br>Resp | LVOTO<br>(Peak<br>grad)                 | LV<br>Dysf<br>(EF) | Events | Additional<br>features                                                                                                           | Others                           |
|-------|-----|---------------------|----------------|---------------|--------------|------------|----------|----|------|------------|-----------|-------------|-------------------|-----------------------------------------|--------------------|--------|----------------------------------------------------------------------------------------------------------------------------------|----------------------------------|
|       |     |                     |                |               |              |            |          |    |      |            |           |             |                   |                                         |                    |        |                                                                                                                                  |                                  |
| II.3  | M   | Yes<br>(Homoz)      | No             | HCM<br>septal | 71           | 75         | I        | -  | -    | 22         | NSTV      | -           | -                 | + (zero<br>at rest;<br>120<br>exercise) | -                  |        | <b>Echo:</b> LA<br>48mm,<br>Diastolic<br>dysfunctio<br>n II, mitral<br>and aortic<br>insufficien<br>cy<br><b>Holter:</b><br>NSVT |                                  |
| III.5 | F   | Obligate<br>carrier |                | NCE           |              |            |          |    |      |            |           |             |                   |                                         |                    |        |                                                                                                                                  |                                  |
| III.3 | M   | Obligate<br>carrier |                | NCE           |              |            |          |    |      |            |           |             |                   |                                         |                    |        |                                                                                                                                  |                                  |
| I.8   | M   | Obligate<br>carrier |                | NCE           |              |            |          |    |      |            |           |             |                   |                                         |                    |        |                                                                                                                                  | Unspec<br>ified<br>Death<br>71 y |
| I.9   | F   | Obligate<br>carrier |                | NCE           |              |            |          |    |      |            |           |             |                   |                                         |                    |        |                                                                                                                                  |                                  |
| II.5  | F   | NGT                 |                | HCM<br>Septal | ?            | 70         | ?        | +  | -    | ?          | ?         | ?           | ?                 |                                         | ?                  |        | Pacemake<br>r<br>implanted<br>(Bradi-<br>tachy<br>synd)                                                                          | Death<br>70 y<br>sepsis          |

Abn BP, abnormal blood pressure response on exercise; AF, atrial fibrillation; Dx, diagnosis; DCM, dilated cardiomyopathy; ECG, electrocardiogram; Echo, echocardiogram; FHSD, family history of sudden death; HCM, hypertrophic cardiomyopathy; Id, individual; LA, left atrium; LGE, late gadolinium enhancement; LVH, left ventricular hypertrophy; LVOTO (peak grad), left ventricle outflow tract obstruction (gradient in mmHg); LV dysf (EF), systolic dysfunction (ejection fraction); max LVH, left ventricular hypertrophy (maximal ventricular wall thickness in mm); MRI, magnetic resonance imaging; NYHA, New York Heart Association functional class; NCE, no clinical evaluation; NGT, no genetic testing; SCD, sudden cardiac death; VT/VF, ventricular tachycardia/ventricular fibrillation. E1, TPM1 p.Arg21Leu. The index case is described in the gray line.

## **Pedigree #2**

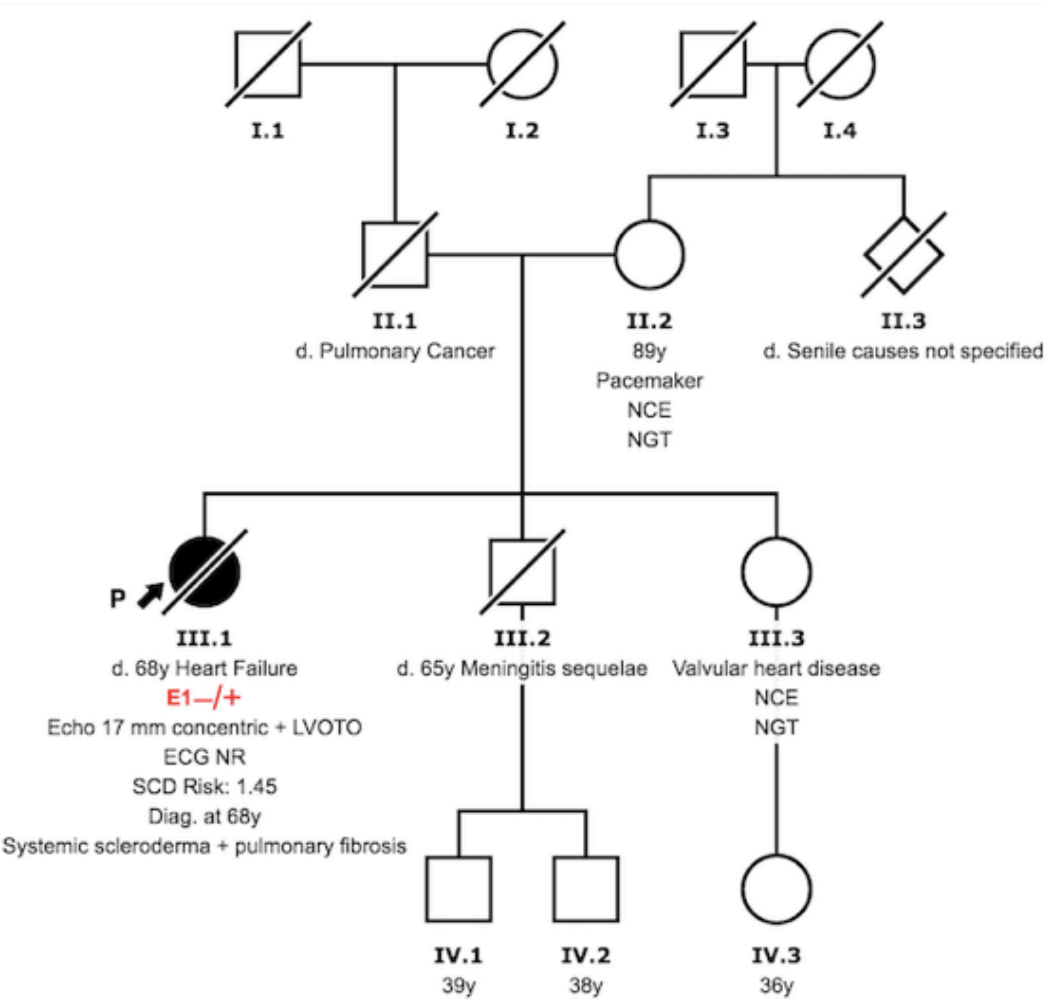

| Id    | Sex | TPM1<br>Arg21Leu | Other<br>mutat | Phenotype         | Age<br>at Dx | Age,<br>y | NYHA | AF | FHSD | Max<br>LVH | TV/<br>FV | Sync<br>ope | Abn<br>BP<br>Resp | LVOTO<br>(peak<br>grad) | LV<br>Dysf<br>(EF) | Events                            | Additional<br>features                                                                                                      | Others                                                                                                     |
|-------|-----|------------------|----------------|-------------------|--------------|-----------|------|----|------|------------|-----------|-------------|-------------------|-------------------------|--------------------|-----------------------------------|-----------------------------------------------------------------------------------------------------------------------------|------------------------------------------------------------------------------------------------------------|
| III.1 | F   | Yes              | No             | HCM<br>concentric | 68           | 68        | IV   | -  | -    | 17         | -         | -           | -                 | +(53)                   | -(75)              | Heart<br>failure<br>death<br>68 y | <b>Echo:</b> LA<br>43 mm,<br>diastolic<br>dysfunctio<br>n I,<br>moderate<br>tricuspid<br>regurgitati<br>on. PSAP<br>70 mmHg | Pulmonary<br>fibrosis,<br>systemic<br>scleroder<br>ma;<br>NO<br>systolic<br>dysfunction<br>was<br>reported |

Abn BP resp, abnormal blood pressure response on exercise; AF, atrial fibrillation; Dx, diagnosis; DCM, dilated cardiomyopathy; ECG, electrocardiogram; Echo, echocardiogram; FHSD, family history of sudden death; HCM, hypertrophic cardiomyopathy; Id, individual; LA, left atrium; LGE, late gadolinium enhancement; LVH, left ventricular hypertrophy; LVOTO (peak grad), left ventricle outflow tract obstruction (gradient in mmHg); LV dysf (EF), systolic dysfunction (ejection fraction); max LVH, left ventricular hypertrophy (maximal ventricular wall thickness in mm); MRI, magnetic resonance imaging; NYHA, New York Heart Association functional class; NCE, no clinical evaluation; NGT, no genetic testing; SCD, sudden cardiac death; VT/VF, ventricular tachycardia/ventricular fibrillation; E1, TPM1 p.Arg21Leu. The index case is described in the gray line.

**Pedigree #3**

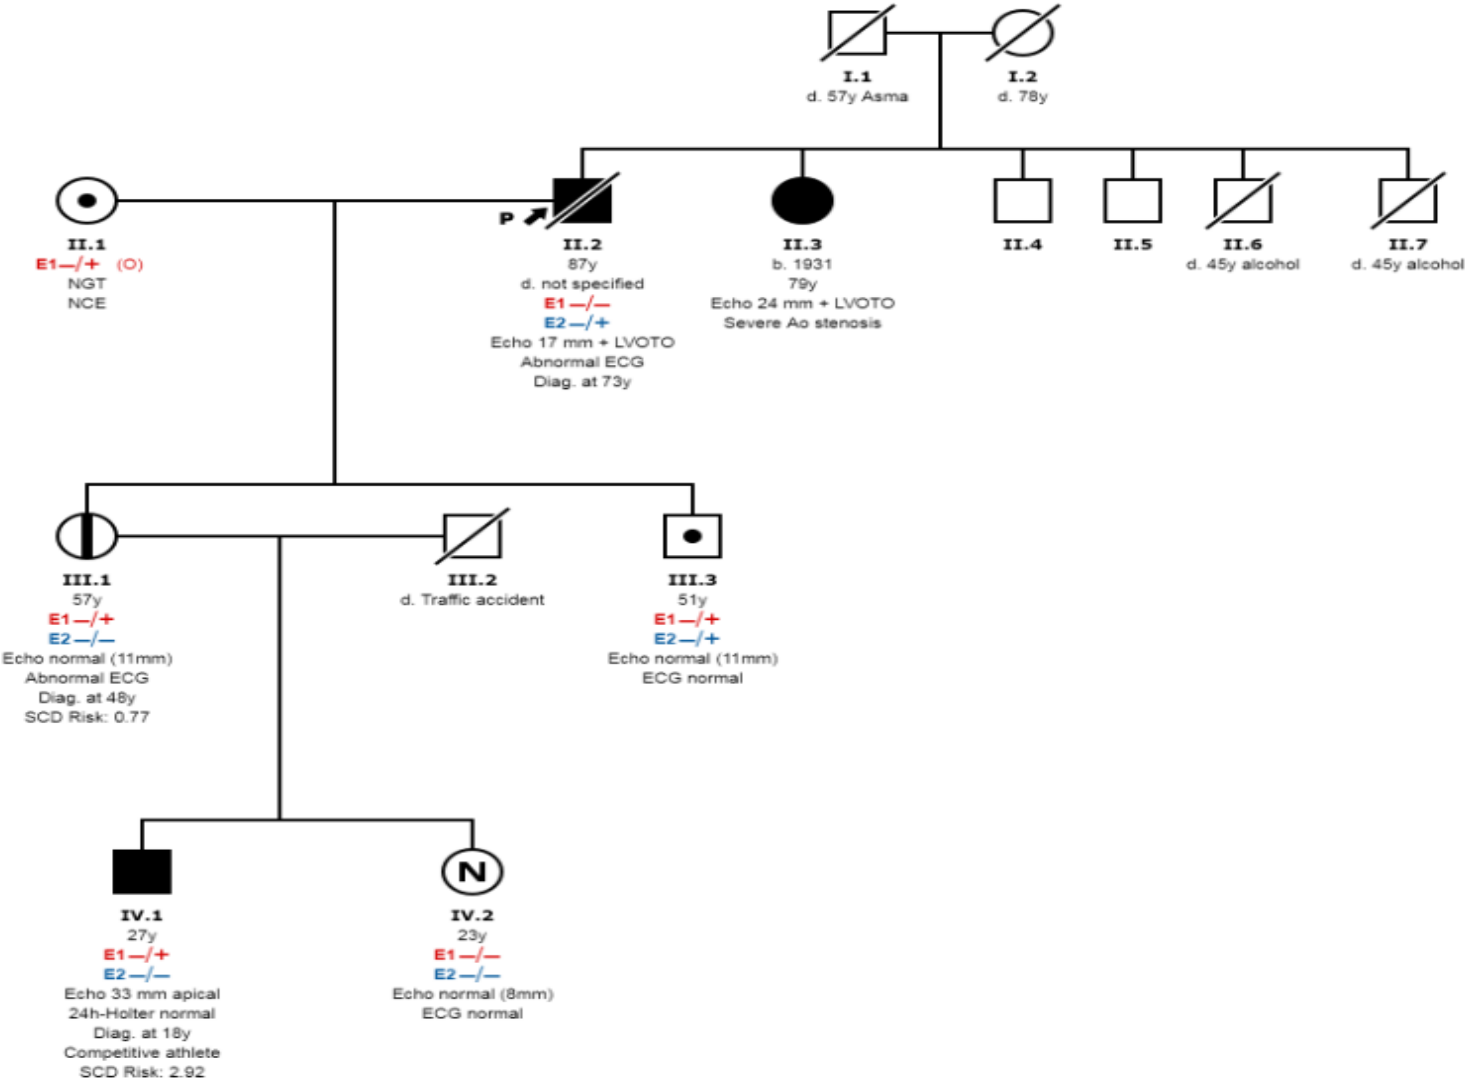

LOD SCORE 0.16



| Id    | Sex | TPM1<br>Arg21Leu    | Other<br>mutat              | Phenotype              | Age<br>at<br>Dx | Age<br>, y | NY<br>HA | AF | FH<br>SD | Max<br>LVH | TV/<br>FV | Sync<br>ope | Abn<br>BP<br>Resp | LVOTO<br>(Peak<br>grad)                   | LV<br>Dysf<br>(EF) | Events | Additional<br>features                                             | Others                                 |
|-------|-----|---------------------|-----------------------------|------------------------|-----------------|------------|----------|----|----------|------------|-----------|-------------|-------------------|-------------------------------------------|--------------------|--------|--------------------------------------------------------------------|----------------------------------------|
| II.2  | M   | No                  | MYH7<br>Thr1019<br>Asn (+?) | HCM<br>septal          | 73              | 83         | II       | +  | -        | 16         | -         | -           | -                 | + (30-55<br>at rest,<br>>250<br>Valsalva) | -(>55)             |        | ECG LVH,<br>anterolateral<br>negative T<br>waves                   |                                        |
| III.1 | F   | Yes                 | No                          | Not<br>affected<br>(?) |                 | 57         | I        | -  | -        | 11         | -         | -           | -                 | -                                         | -(83)              |        | Echo: Diastolic<br>dysfunction I.<br>ECG:<br>pathologic Q<br>waves |                                        |
| III.3 | M   | Yes                 | MYH7<br>Thr1019<br>Asn (+?) | Not<br>affected        |                 | 51         | I        | -  | -        | 11         | -         | -           | -                 | -                                         | -(61)              |        | ECG normal                                                         |                                        |
| IV.1  | M   | Yes                 | No                          | HCM<br>atypical        | 18              | 27         | I        | -  | -        | 33         | -         | -           | -                 | -                                         | -(67)              |        | ECG high QRS<br>voltage,<br>pathological Q<br>waves. LA 40<br>mm   | Compe<br>titive<br>athlete<br>football |
| II.1  | F   | Obligate<br>carrier | ?                           | NCE                    |                 |            |          |    |          |            |           |             |                   |                                           |                    |        |                                                                    |                                        |

Abn BP resp, abnormal blood pressure response on exercise; AF, atrial fibrillation; Dx, diagnosis; DCM, dilated cardiomyopathy; ECG, electrocardiogram; Echo, echocardiogram; FHSD, family history of sudden death; HCM, hypertrophic cardiomyopathy; Id, individual; LA, left atrium; LGE, late gadolinium enhancement; LVH, left ventricular hypertrophy; LVOTO (peak grad), left ventricle outflow tract obstruction (gradient in mmHg); LV dysf (EF), systolic dysfunction (ejection fraction); max LVH, left ventricular hypertrophy (maximal ventricular wall thickness in mm); MRI, magnetic resonance imaging; NYHA, New York Heart Association functional class; NCE, no clinical evaluation; NGT, no genetic testing; SCD, sudden cardiac death; VT/VF, ventricular tachycardia/ventricular fibrillation; E1, TPM1 p.Arg21Leu.; E2, other variant (see table). The index case is described in the gray line.

**Comments Pedigree #3:**

**1. Complex genotype:** The single p.Arg21Leu carrier (III.3) with the additional variant (*MYH7* p.Thr1019Asn) in this family was unaffected at age 51 years. Both variants have been described as having late/incomplete penetrance.

We consider that ***MYH7* p.Thr1019Asn** is a likely rare pathogenic variant (present in 4 heterozygous carriers in the gnomAD database). It has been reported in the literature in a French family of African descent in which 4 carriers had dilated cardiomyopathy and 5 carriers were unaffected. In our center, we have identified it in some DCM cases, but mainly in multiple HCM patients. In some cases, the variant was identified in association with another sarcomere variant, as in this family.

>> In this family, the index case (II.2) was studied by NGS panel; however, the familial variant in *MYH7* was not identified in other family members (III.1 and IV.1) by Sanger sequencing. Therefore, individual III.1 was tested with an NGS panel, which allowed the identification of the *TPM1* p.Arg21Leu.

**Pedigree #4**

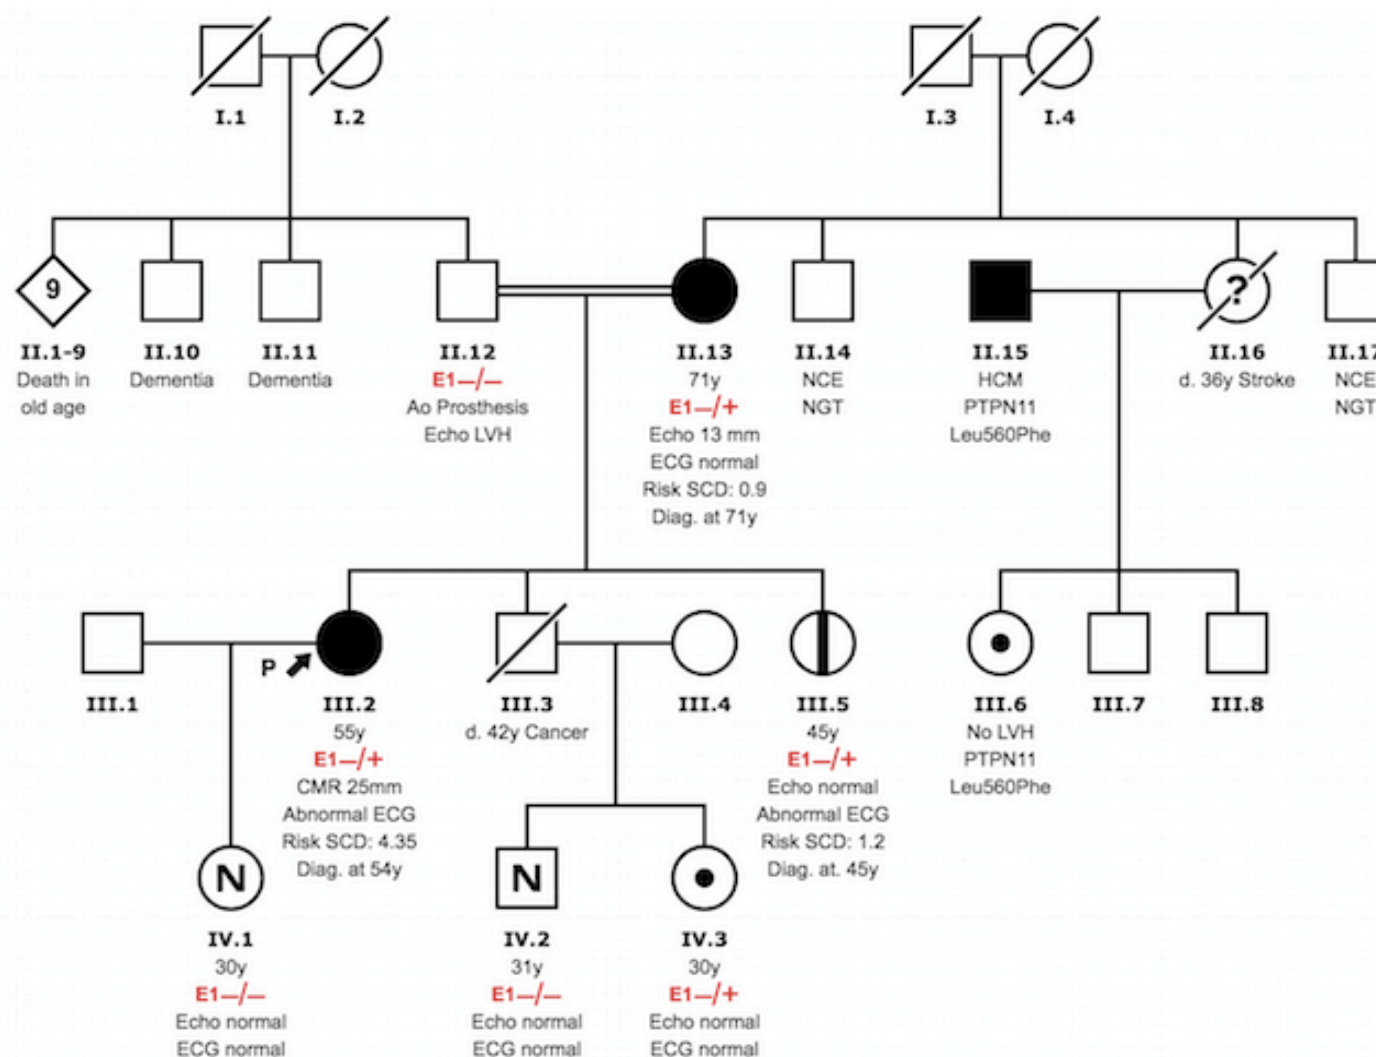

LOD SCORE: 0.68

| Id    | Sex | TPM1<br>Arg21Leu | Other<br>mutat | Phenoty<br>pe          | Age<br>at Dx | Age,<br>y | NY<br>HA | AF | FH<br>SD | Max<br>LVH | TV/<br>FV | Sync<br>ope | Abn<br>BP<br>Resp | LVOTO<br>(Peak<br>grad) | LV Dysf<br>(EF) | Events                              | Additional<br>features                                                                                                           | Others |
|-------|-----|------------------|----------------|------------------------|--------------|-----------|----------|----|----------|------------|-----------|-------------|-------------------|-------------------------|-----------------|-------------------------------------|----------------------------------------------------------------------------------------------------------------------------------|--------|
| III.2 | F   | Yes              | No             | HCM<br>septal          | 54           | 58        | II       | +  | -        | 25         | -         | +           | -                 | -                       | -(60)           |                                     | <b>MRI:</b> LA 45<br>mm, diastolic<br>dysfunction,<br>LV mass 173g.<br><b>ECG:</b> negative<br>T waves,<br>pathologic Q<br>waves | SAH    |
| III.5 | F   | Yes              |                | Not<br>affected<br>(?) | 45           | 45        | I        | -  | -        | 13         | -         | -           | -                 | -                       | -(>55)          |                                     | <b>ECG:</b><br>Abnormal<br>progression of<br>R wave V <sub>1</sub> -V <sub>3</sub>                                               |        |
| II.13 | F   | Yes              |                | HCM                    | 71           | 71        | I        | -  | -        | 13         | -         | -           | -                 | -                       | -(>55)          |                                     | <b>ECG</b> normal.<br><b>Echo:</b> Mild Ao,<br>mild RT                                                                           | SAH    |
| IV.3  | F   | Yes              |                | Not<br>affected        |              | 30        | I        | -  | -        | -          | -         | -           | -                 | -                       | -               |                                     | <b>ECG</b> normal<br><b>Echo</b> normal                                                                                          |        |
| II.16 | F   | NGT              |                | ?                      |              | 36        |          |    |          |            |           |             |                   |                         |                 | Stroke-<br>related<br>death<br>36-y |                                                                                                                                  |        |

Abn BP resp, abnormal blood pressure response on exercise; AF, atrial fibrillation; Dx, diagnosis; DCM, dilated cardiomyopathy; ECG, electrocardiogram; Echo, echocardiogram; FHSD, family history of sudden death; HCM, hypertrophic cardiomyopathy; Id, individual; LA, left atrium; LGE, late gadolinium enhancement; LVH, left ventricular hypertrophy; LVOTO (peak grad), left ventricle outflow tract obstruction (gradient in mmHg); LV dysf (EF), systolic dysfunction (ejection fraction); max LVH, left ventricular hypertrophy (maximal ventricular wall thickness in mm); MRI, magnetic resonance imaging; NYHA, New York Heart Association functional class; NCE, no clinical evaluation; NGT, no genetic testing; SAH, systemic arterial hypertension; SCD, sudden cardiac death; VT/VF, ventricular tachycardia/ventricular fibrillation; E1, TPM1 p.Arg21Leu. The index case is described in the gray line.

**PS: At the pedigree image:** Patients II.15 and III.6, who were carriers of a PTPN11 variant, and not of the TPM1 variant, were not included in our study population.

**Pedigree #5**

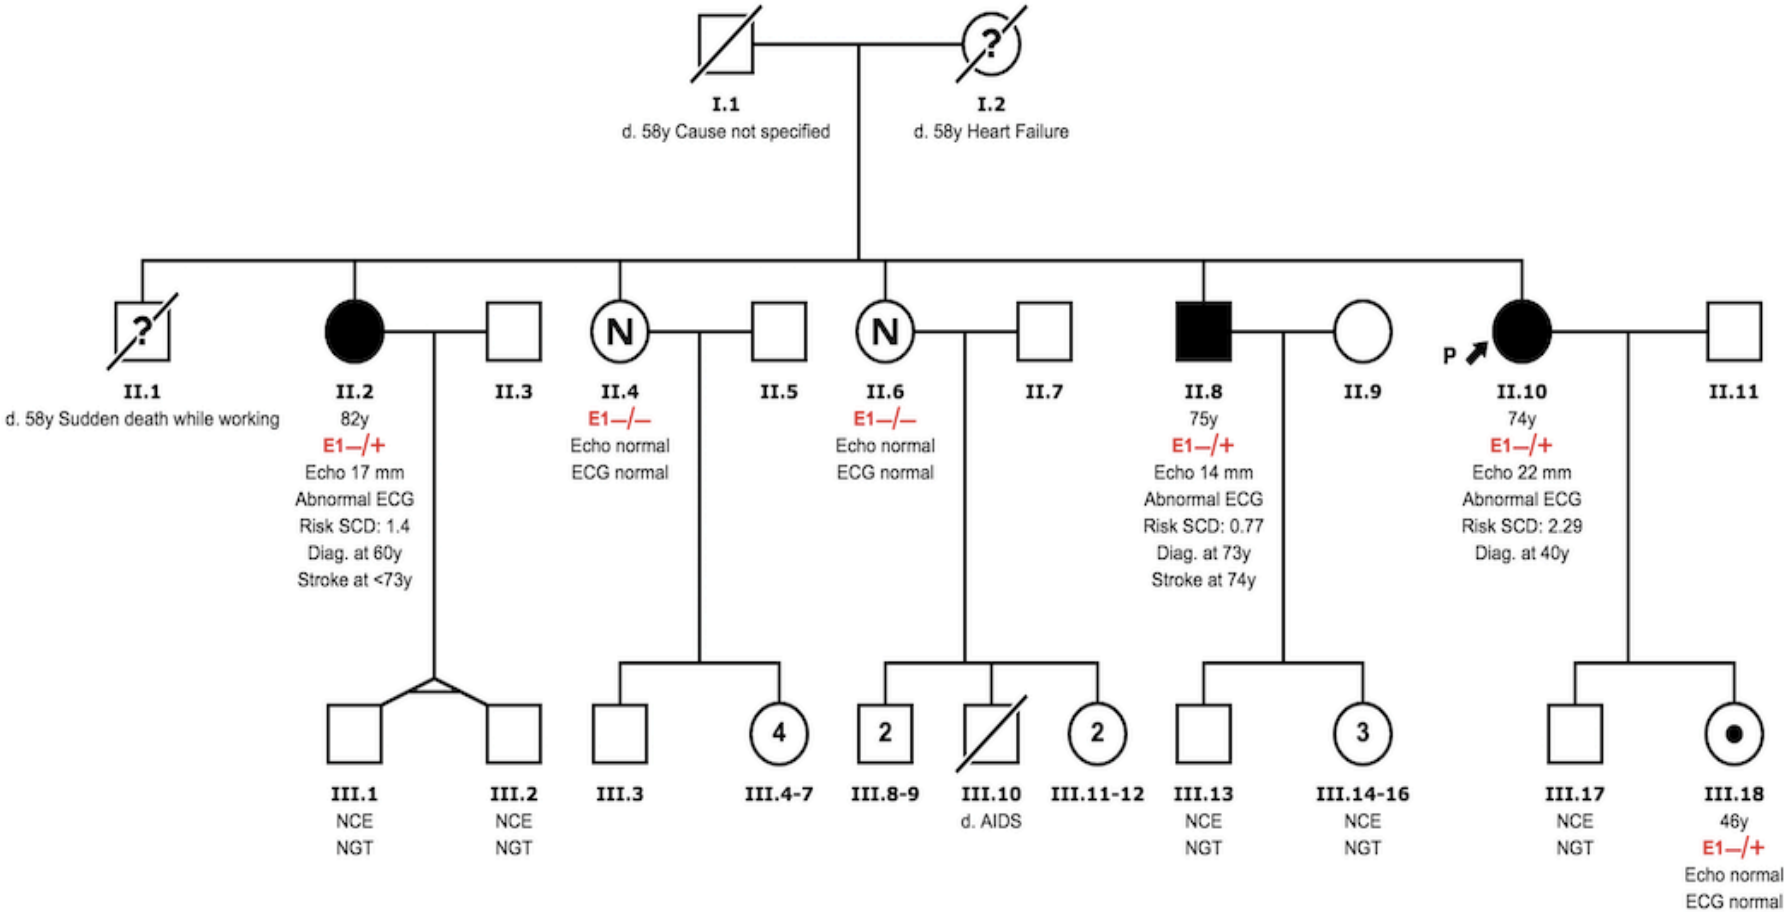

LOD SCORE: 0.17

| Table 1. Clinical and genetic data of probands and their relatives |  |  |  |  |  |  |  |  |  |  |  |  |  |  |  |  |  |  |
|--------------------------------------------------------------------|--|--|--|--|--|--|--|--|--|--|--|--|--|--|--|--|--|--|
| Table 1. Clinical and genetic data of probands and their relatives |  |  |  |  |  |  |  |  |  |  |  |  |  |  |  |  |  |  |
| Table 1. Clinical and genetic data of probands and their relatives |  |  |  |  |  |  |  |  |  |  |  |  |  |  |  |  |  |  |
| Table 1. Clinical and genetic data of probands and their relatives |  |  |  |  |  |  |  |  |  |  |  |  |  |  |  |  |  |  |
| Table 1. Clinical and genetic data of probands and their relatives |  |  |  |  |  |  |  |  |  |  |  |  |  |  |  |  |  |  |
| Table 1. Clinical and genetic data of probands and their relatives |  |  |  |  |  |  |  |  |  |  |  |  |  |  |  |  |  |  |
| Table 1. Clinical and genetic data of probands and their relatives |  |  |  |  |  |  |  |  |  |  |  |  |  |  |  |  |  |  |
| Table 1. Clinical and genetic data of probands and their relatives |  |  |  |  |  |  |  |  |  |  |  |  |  |  |  |  |  |  |
| Table 1. Clinical and genetic data of probands and their relatives |  |  |  |  |  |  |  |  |  |  |  |  |  |  |  |  |  |  |
| Table 1. Clinical and genetic data of probands and their relatives |  |  |  |  |  |  |  |  |  |  |  |  |  |  |  |  |  |  |
| Table 1. Clinical and genetic data of probands and their relatives |  |  |  |  |  |  |  |  |  |  |  |  |  |  |  |  |  |  |
| Table 1. Clinical and genetic data of probands and their relatives |  |  |  |  |  |  |  |  |  |  |  |  |  |  |  |  |  |  |
| Table 1. Clinical and genetic data of probands and their relatives |  |  |  |  |  |  |  |  |  |  |  |  |  |  |  |  |  |  |
| Table 1. Clinical and genetic data of probands and their relatives |  |  |  |  |  |  |  |  |  |  |  |  |  |  |  |  |  |  |
| Table 1. Clinical and genetic data of probands and their relatives |  |  |  |  |  |  |  |  |  |  |  |  |  |  |  |  |  |  |
| Table 1. Clinical and genetic data of probands and their relatives |  |  |  |  |  |  |  |  |  |  |  |  |  |  |  |  |  |  |
| Table 1. Clinical and genetic data of probands and their relatives |  |  |  |  |  |  |  |  |  |  |  |  |  |  |  |  |  |  |
| Table 1. Clinical and genetic data of probands and their relatives |  |  |  |  |  |  |  |  |  |  |  |  |  |  |  |  |  |  |
| Table 1. Clinical and genetic data of probands and their relatives |  |  |  |  |  |  |  |  |  |  |  |  |  |  |  |  |  |  |
| Table 1. Clinical and genetic data of probands and their relatives |  |  |  |  |  |  |  |  |  |  |  |  |  |  |  |  |  |  |
| Table 1. Clinical and genetic data of probands and their relatives |  |  |  |  |  |  |  |  |  |  |  |  |  |  |  |  |  |  |
| Table 1. Clinical and genetic data of probands and their relatives |  |  |  |  |  |  |  |  |  |  |  |  |  |  |  |  |  |  |
| Table 1. Clinical and genetic data of probands and their relatives |  |  |  |  |  |  |  |  |  |  |  |  |  |  |  |  |  |  |
| Table 1. Clinical and genetic data of probands and their relatives |  |  |  |  |  |  |  |  |  |  |  |  |  |  |  |  |  |  |
| Table 1. Clinical and genetic data of probands and their relatives |  |  |  |  |  |  |  |  |  |  |  |  |  |  |  |  |  |  |
| Table 1. Clinical and genetic data of probands and their relatives |  |  |  |  |  |  |  |  |  |  |  |  |  |  |  |  |  |  |
| Table 1. Clinical and genetic data of probands and their relatives |  |  |  |  |  |  |  |  |  |  |  |  |  |  |  |  |  |  |
| Table 1. Clinical and genetic data of probands and their relatives |  |  |  |  |  |  |  |  |  |  |  |  |  |  |  |  |  |  |
| Table 1. Clinical and genetic data of probands and their relatives |  |  |  |  |  |  |  |  |  |  |  |  |  |  |  |  |  |  |
| Table 1. Clinical and genetic data of probands and their relatives |  |  |  |  |  |  |  |  |  |  |  |  |  |  |  |  |  |  |
| Table 1. Clinical and genetic data of probands and their relatives |  |  |  |  |  |  |  |  |  |  |  |  |  |  |  |  |  |  |
| Table 1. Clinical and genetic data of probands and their relatives |  |  |  |  |  |  |  |  |  |  |  |  |  |  |  |  |  |  |
| Table 1. Clinical and genetic data of probands and their relatives |  |  |  |  |  |  |  |  |  |  |  |  |  |  |  |  |  |  |
| Table 1. Clinical and genetic data of probands and their relatives |  |  |  |  |  |  |  |  |  |  |  |  |  |  |  |  |  |  |
| Table 1. Clinical and genetic data of probands and their relatives |  |  |  |  |  |  |  |  |  |  |  |  |  |  |  |  |  |  |
| Table 1. Clinical and genetic data of probands and their relatives |  |  |  |  |  |  |  |  |  |  |  |  |  |  |  |  |  |  |
| Table 1. Clinical and genetic data of probands and their relatives |  |  |  |  |  |  |  |  |  |  |  |  |  |  |  |  |  |  |
| Table 1. Clinical and genetic data of probands and their relatives |  |  |  |  |  |  |  |  |  |  |  |  |  |  |  |  |  |  |
| Table 1. Clinical and genetic data of probands and their relatives |  |  |  |  |  |  |  |  |  |  |  |  |  |  |  |  |  |  |
| Table 1. Clinical and genetic data of probands and their relatives |  |  |  |  |  |  |  |  |  |  |  |  |  |  |  |  |  |  |
| Table 1. Clinical and genetic data of probands and their relatives |  |  |  |  |  |  |  |  |  |  |  |  |  |  |  |  |  |  |
| Table 1. Clinical and genetic data of probands and their relatives |  |  |  |  |  |  |  |  |  |  |  |  |  |  |  |  |  |  |
| Table 1. Clinical and genetic data of probands and their relatives |  |  |  |  |  |  |  |  |  |  |  |  |  |  |  |  |  |  |
| Table 1. Clinical and genetic data of probands and their relatives |  |  |  |  |  |  |  |  |  |  |  |  |  |  |  |  |  |  |
| Table 1. Clinical and genetic data of probands and their relatives |  |  |  |  |  |  |  |  |  |  |  |  |  |  |  |  |  |  |
| Table 1. Clinical and genetic data of probands and their relatives |  |  |  |  |  |  |  |  |  |  |  |  |  |  |  |  |  |  |
| Table 1. Clinical and genetic data of probands and their relatives |  |  |  |  |  |  |  |  |  |  |  |  |  |  |  |  |  |  |
| Table 1. Clinical and genetic data of probands and their relatives |  |  |  |  |  |  |  |  |  |  |  |  |  |  |  |  |  |  |
| Table 1. Clinical and genetic data of probands and their relatives |  |  |  |  |  |  |  |  |  |  |  |  |  |  |  |  |  |  |
| Table 1. Clinical and genetic data of probands and their relatives |  |  |  |  |  |  |  |  |  |  |  |  |  |  |  |  |  |  |
| Table 1. Clinical and genetic data of probands and their relatives |  |  |  |  |  |  |  |  |  |  |  |  |  |  |  |  |  |  |
| Table 1. Clinical and genetic data of probands and their relatives |  |  |  |  |  |  |  |  |  |  |  |  |  |  |  |  |  |  |
| Table 1. Clinical and genetic data of probands and their relatives |  |  |  |  |  |  |  |  |  |  |  |  |  |  |  |  |  |  |
| Table 1. Clinical and genetic data of probands and their relatives |  |  |  |  |  |  |  |  |  |  |  |  |  |  |  |  |  |  |
| Table 1. Clinical and genetic data of probands and their relatives |  |  |  |  |  |  |  |  |  |  |  |  |  |  |  |  |  |  |
| Table 1. Clinical and genetic data of probands and their relatives |  |  |  |  |  |  |  |  |  |  |  |  |  |  |  |  |  |  |
| Table 1. Clinical and genetic data of probands and their relatives |  |  |  |  |  |  |  |  |  |  |  |  |  |  |  |  |  |  |
| Table 1. Clinical and genetic data of probands and their relatives |  |  |  |  |  |  |  |  |  |  |  |  |  |  |  |  |  |  |
| Table 1. Clinical and genetic data of probands and their relatives |  |  |  |  |  |  |  |  |  |  |  |  |  |  |  |  |  |  |
| Table 1. Clinical and genetic data of probands and their relatives |  |  |  |  |  |  |  |  |  |  |  |  |  |  |  |  |  |  |
| Table 1. Clinical and genetic data of probands and their relatives |  |  |  |  |  |  |  |  |  |  |  |  |  |  |  |  |  |  |
| Table 1. Clinical and genetic data of probands and their relatives |  |  |  |  |  |  |  |  |  |  |  |  |  |  |  |  |  |  |
| Table 1. Clinical and genetic data of probands and their relatives |  |  |  |  |  |  |  |  |  |  |  |  |  |  |  |  |  |  |
| Table 1. Clinical and genetic data of probands and their relatives |  |  |  |  |  |  |  |  |  |  |  |  |  |  |  |  |  |  |
| Table 1. Clinical and genetic data of probands and their relatives |  |  |  |  |  |  |  |  |  |  |  |  |  |  |  |  |  |  |
| Table 1. Clinical and genetic data of probands and their relatives |  |  |  |  |  |  |  |  |  |  |  |  |  |  |  |  |  |  |
| Table 1. Clinical and genetic data of probands and their relatives |  |  |  |  |  |  |  |  |  |  |  |  |  |  |  |  |  |  |
| Table 1. Clinical and genetic data of probands and their relatives |  |  |  |  |  |  |  |  |  |  |  |  |  |  |  |  |  |  |
| Table 1. Clinical and genetic data of probands and their relatives |  |  |  |  |  |  |  |  |  |  |  |  |  |  |  |  |  |  |
| Table 1. Clinical and genetic data of probands and their relatives |  |  |  |  |  |  |  |  |  |  |  |  |  |  |  |  |  |  |
| Table 1. Clinical and genetic data of probands and their relatives |  |  |  |  |  |  |  |  |  |  |  |  |  |  |  |  |  |  |
| Table 1. Clinical and genetic data of probands and their relatives |  |  |  |  |  |  |  |  |  |  |  |  |  |  |  |  |  |  |
| Table 1. Clinical and genetic data of probands and their relatives |  |  |  |  |  |  |  |  |  |  |  |  |  |  |  |  |  |  |
| Table 1. Clinical and genetic data of probands and their relatives |  |  |  |  |  |  |  |  |  |  |  |  |  |  |  |  |  |  |
| Table 1. Clinical and genetic data of probands and their relatives |  |  |  |  |  |  |  |  |  |  |  |  |  |  |  |  |  |  |
| Table 1. Clinical and genetic data of probands and their relatives |  |  |  |  |  |  |  |  |  |  |  |  |  |  |  |  |  |  |
| Table 1. Clinical and genetic data of probands and their relatives |  |  |  |  |  |  |  |  |  |  |  |  |  |  |  |  |  |  |
| Table 1. Clinical and genetic data of probands and their relatives |  |  |  |  |  |  |  |  |  |  |  |  |  |  |  |  |  |  |
| Table 1. Clinical and genetic data of probands and their relatives |  |  |  |  |  |  |  |  |  |  |  |  |  |  |  |  |  |  |
| Table 1. Clinical and genetic data of probands and their relatives |  |  |  |  |  |  |  |  |  |  |  |  |  |  |  |  |  |  |
| Table 1. Clinical and genetic data of probands and their relatives |  |  |  |  |  |  |  |  |  |  |  |  |  |  |  |  |  |  |
| Table 1. Clinical and genetic data of probands and their relatives |  |  |  |  |  |  |  |  |  |  |  |  |  |  |  |  |  |  |
| Table 1. Clinical and genetic data of probands and their relatives |  |  |  |  |  |  |  |  |  |  |  |  |  |  |  |  |  |  |
| Table 1. Clinical and genetic data of probands and their relatives |  |  |  |  |  |  |  |  |  |  |  |  |  |  |  |  |  |  |
| Table 1. Clinical and genetic data of probands and their relatives |  |  |  |  |  |  |  |  |  |  |  |  |  |  |  |  |  |  |
| Table 1. Clinical and genetic data of probands and their relatives |  |  |  |  |  |  |  |  |  |  |  |  |  |  |  |  |  |  |
| Table 1. Clinical and genetic data of probands and their relatives |  |  |  |  |  |  |  |  |  |  |  |  |  |  |  |  |  |  |
| Table 1. Clinical and genetic data of probands and their relatives |  |  |  |  |  |  |  |  |  |  |  |  |  |  |  |  |  |  |
| Table 1. Clinical and genetic data of probands and their relatives |  |  |  |  |  |  |  |  |  |  |  |  |  |  |  |  |  |  |
| Table 1. Clinical and genetic data of probands and their relatives |  |  |  |  |  |  |  |  |  |  |  |  |  |  |  |  |  |  |
| Table 1. Clinical and genetic data of probands and their relatives |  |  |  |  |  |  |  |  |  |  |  |  |  |  |  |  |  |  |
| Table 1. Clinical and genetic data of probands and their relatives |  |  |  |  |  |  |  |  |  |  |  |  |  |  |  |  |  |  |
| Table 1. Clinical and genetic data of probands and their relatives |  |  |  |  |  |  |  |  |  |  |  |  |  |  |  |  |  |  |
| Table 1. Clinical and genetic data of probands and their relatives |  |  |  |  |  |  |  |  |  |  |  |  |  |  |  |  |  |  |
| Table 1. Clinical and genetic data of probands and their relatives |  |  |  |  |  |  |  |  |  |  |  |  |  |  |  |  |  |  |
| Table 1. Clinical and genetic data of probands and their relatives |  |  |  |  |  |  |  |  |  |  |  |  |  |  |  |  |  |  |
| Table 1. Clinical and genetic data of probands and their relatives |  |  |  |  |  |  |  |  |  |  |  |  |  |  |  |  |  |  |
| Table 1. Clinical and genetic data of probands and their relatives |  |  |  |  |  |  |  |  |  |  |  |  |  |  |  |  |  |  |
| Table 1. Clinical and genetic data of probands and their relatives |  |  |  |  |  |  |  |  |  |  |  |  |  |  |  |  |  |  |
| Table 1. Clinical and genetic data of probands and their relatives |  |  |  |  |  |  |  |  |  |  |  |  |  |  |  |  |  |  |
| Table 1. Clinical and genetic data of probands and their relatives |  |  |  |  |  |  |  |  |  |  |  |  |  |  |  |  |  |  |
| Table 1. Clinical and genetic data of probands and their relatives |  |  |  |  |  |  |  |  |  |  |  |  |  |  |  |  |  |  |
| Table 1. Clinical and genetic data of probands and their relatives |  |  |  |  |  |  |  |  |  |  |  |  |  |  |  |  |  |  |
| Table 1. Clinical and genetic data of probands and their relatives |  |  |  |  |  |  |  |  |  |  |  |  |  |  |  |  |  |  |
| Table 1. Clinical and genetic data of probands and their relatives |  |  |  |  |  |  |  |  |  |  |  |  |  |  |  |  |  |  |
| Table 1. Clinical and genetic data of probands and their relatives |  |  |  |  |  |  |  |  |  |  |  |  |  |  |  |  |  |  |
| Table 1. Clinical and genetic data of probands and their relatives |  |  |  |  |  |  |  |  |  |  |  |  |  |  |  |  |  |  |
| Table 1. Clinical and genetic data of probands and their relatives |  |  |  |  |  |  |  |  |  |  |  |  |  |  |  |  |  |  |
| Table 1. Clinical and genetic data of probands and their relatives |  |  |  |  |  |  |  |  |  |  |  |  |  |  |  |  |  |  |
| Table 1. Clinical and genetic data of probands and their relatives |  |  |  |  |  |  |  |  |  |  |  |  |  |  |  |  |  |  |
| Table 1. Clinical and genetic data of probands and their relatives |  |  |  |  |  |  |  |  |  |  |  |  |  |  |  |  |  |  |
| Table 1. Clinical and genetic data of probands and their relatives |  |  |  |  |  |  |  |  |  |  |  |  |  |  |  |  |  |  |
| Table 1. Clinical and genetic data of probands and their relatives |  |  |  |  |  |  |  |  |  |  |  |  |  |  |  |  |  |  |
| Table 1. Clinical and genetic data of probands and their relatives |  |  |  |  |  |  |  |  |  |  |  |  |  |  |  |  |  |  |
| Table 1. Clinical and genetic data of probands and their relatives |  |  |  |  |  |  |  |  |  |  |  |  |  |  |  |  |  |  |
| Table 1. Clinical and genetic data of probands and their relatives |  |  |  |  |  |  |  |  |  |  |  |  |  |  |  |  |  |  |
| Table 1. Clinical and genetic data of probands and their relatives |  |  |  |  |  |  |  |  |  |  |  |  |  |  |  |  |  |  |
| Table 1. Clinical and genetic data of probands and their relatives |  |  |  |  |  |  |  |  |  |  |  |  |  |  |  |  |  |  |
| Table 1. Clinical and genetic data of probands and their relatives |  |  |  |  |  |  |  |  |  |  |  |  |  |  |  |  |  |  |
| Table 1. Clinical and genetic data of probands and their relatives |  |  |  |  |  |  |  |  |  |  |  |  |  |  |  |  |  |  |
| Table 1. Clinical and genetic data of probands and their relatives |  |  |  |  |  |  |  |  |  |  |  |  |  |  |  |  |  |  |
| Table 1. Clinical and genetic data of probands and their relatives |  |  |  |  |  |  |  |  |  |  |  |  |  |  |  |  |  |  |
| Table 1. Clinical and genetic data of probands and their relatives |  |  |  |  |  |  |  |  |  |  |  |  |  |  |  |  |  |  |
| Table 1. Clinical and genetic data of probands and their relatives |  |  |  |  |  |  |  |  |  |  |  |  |  |  |  |  |  |  |
| Table 1. Clinical and genetic data of probands and their relatives |  |  |  |  |  |  |  |  |  |  |  |  |  |  |  |  |  |  |
| Table 1. Clinical and genetic data of probands and their relatives |  |  |  |  |  |  |  |  |  |  |  |  |  |  |  |  |  |  |
| Table 1. Clinical and genetic data of probands and their relatives |  |  |  |  |  |  |  |  |  |  |  |  |  |  |  |  |  |  |
| Table 1. Clinical and genetic data of probands and their relatives |  |  |  |  |  |  |  |  |  |  |  |  |  |  |  |  |  |  |
| Table 1. Clinical and genetic data of probands and their relatives |  |  |  |  |  |  |  |  |  |  |  |  |  |  |  |  |  |  |
| Table 1. Clinical and genetic data of probands and their relatives |  |  |  |  |  |  |  |  |  |  |  |  |  |  |  |  |  |  |
| Table 1. Clinical and genetic data of probands and their relatives |  |  |  |  |  |  |  |  |  |  |  |  |  |  |  |  |  |  |
| Table 1. Clinical and genetic data of probands and their relatives |  |  |  |  |  |  |  |  |  |  |  |  |  |  |  |  |  |  |
| Table 1. Clinical and genetic data of probands and their relatives |  |  |  |  |  |  |  |  |  |  |  |  |  |  |  |  |  |  |
| Table 1. Clinical and genetic data of probands and their relatives |  |  |  |  |  |  |  |  |  |  |  |  |  |  |  |  |  |  |
| Table 1. Clinical and genetic data of probands and their relatives |  |  |  |  |  |  |  |  |  |  |  |  |  |  |  |  |  |  |
| Table 1. Clinical and genetic data of probands and their relatives |  |  |  |  |  |  |  |  |  |  |  |  |  |  |  |  |  |  |
| Table 1. Clinical and genetic data of probands and their relatives |  |  |  |  |  |  |  |  |  |  |  |  |  |  |  |  |  |  |
| Table 1. Clinical and genetic data of probands and their relatives |  |  |  |  |  |  |  |  |  |  |  |  |  |  |  |  |  |  |
| Table 1. Clinical and genetic data of probands and their relatives |  |  |  |  |  |  |  |  |  |  |  |  |  |  |  |  |  |  |
| Table 1. Clinical and genetic data of probands and their relatives |  |  |  |  |  |  |  |  |  |  |  |  |  |  |  |  |  |  |
| Table 1. Clinical and genetic data of probands and their relatives |  |  |  |  |  |  |  |  |  |  |  |  |  |  |  |  |  |  |
| Table 1. Clinical and genetic data of probands and their relatives |  |  |  |  |  |  |  |  |  |  |  |  |  |  |  |  |  |  |
| Table 1. Clinical and genetic data of probands and their relatives |  |  |  |  |  |  |  |  |  |  |  |  |  |  |  |  |  |  |
| Table 1. Clinical and genetic data of probands and their relatives |  |  |  |  |  |  |  |  |  |  |  |  |  |  |  |  |  |  |
| Table 1. Clinical and genetic data of probands and their relatives |  |  |  |  |  |  |  |  |  |  |  |  |  |  |  |  |  |  |
| Table 1. Clinical and genetic data of probands and their relatives |  |  |  |  |  |  |  |  |  |  |  |  |  |  |  |  |  |  |
| Table 1. Clinical and genetic data of probands and their relatives |  |  |  |  |  |  |  |  |  |  |  |  |  |  |  |  |  |  |
| Table 1. Clinical and genetic data of probands and their relatives |  |  |  |  |  |  |  |  |  |  |  |  |  |  |  |  |  |  |
| Table 1. Clinical and genetic data of probands and their relatives |  |  |  |  |  |  |  |  |  |  |  |  |  |  |  |  |  |  |
| Table 1. Clinical and genetic data of probands and their relatives |  |  |  |  |  |  |  |  |  |  |  |  |  |  |  |  |  |  |
| Table 1. Clinical and genetic data of probands and their relatives |  |  |  |  |  |  |  |  |  |  |  |  |  |  |  |  |  |  |
| Table 1. Clinical and genetic data of probands and their relatives |  |  |  |  |  |  |  |  |  |  |  |  |  |  |  |  |  |  |
| Table 1. Clinical and genetic data of probands and their relatives |  |  |  |  |  |  |  |  |  |  |  |  |  |  |  |  |  |  |
| Table 1. Clinical and genetic data of probands and their relatives |  |  |  |  |  |  |  |  |  |  |  |  |  |  |  |  |  |  |
| Table 1. Clinical and genetic data of probands and their relatives |  |  |  |  |  |  |  |  |  |  |  |  |  |  |  |  |  |  |
| Table 1. Clinical and genetic data of probands and their relatives |  |  |  |  |  |  |  |  |  |  |  |  |  |  |  |  |  |  |
| Table 1. Clinical and genetic data of probands and their relatives |  |  |  |  |  |  |  |  |  |  |  |  |  |  |  |  |  |  |
| Table 1. Clinical and genetic data of probands                     |  |  |  |  |  |  |  |  |  |  |  |  |  |  |  |  |  |  |

Abn BP resp, abnormal blood pressure response on exercise; AF, atrial fibrillation; Dx, diagnosis; DCM, dilated cardiomyopathy; ECG, electrocardiogram; Echo, echocardiogram; FHSD, family history of sudden death; HCM, hypertrophic cardiomyopathy; Id, individual; LA, left atrium; LGE, late gadolinium enhancement; LVH, left ventricular hypertrophy; LVOTO (peak grad), left ventricle outflow tract obstruction (gradient in mmHg); LV dysf (EF), systolic dysfunction (ejection fraction); max LVH, left ventricular hypertrophy (maximal ventricular wall thickness in mm); MRI, magnetic resonance imaging; NYHA, New York Heart Association functional class; NCE, no clinical evaluation; NGT, no genetic testing; SCD, sudden cardiac death; VT/VF, ventricular tachycardia/ventricular fibrillation.



**Pedigree #6**

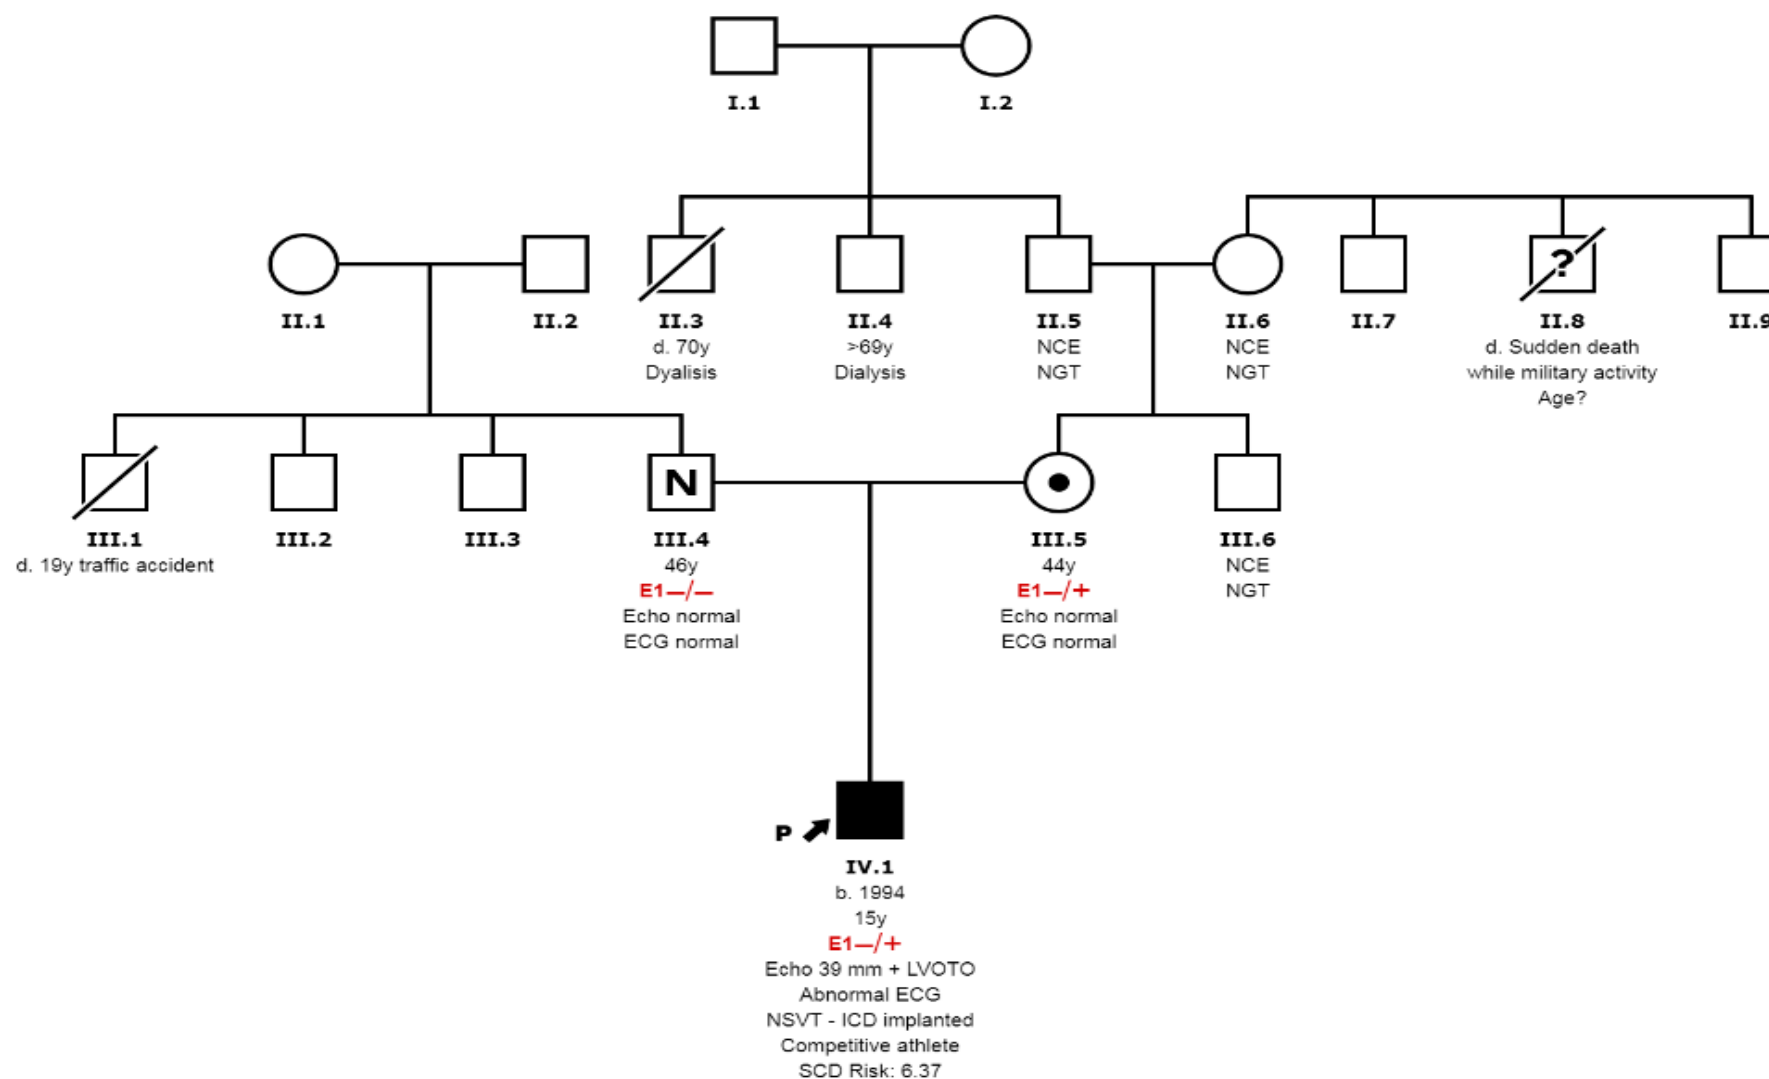

| Id    | Sex | TPM1<br>Arg21Leu | Other<br>mutat | Phenoty<br>pe   | Age<br>at<br>Dx | Age<br>, y | NY<br>HA | AF | FHSD | Max<br>LVH | TV/<br>FV | Synco<br>pe | Abn<br>BP<br>Resp | LVOTO<br>(Peak<br>grad) | LV<br>Dys<br>f<br>(EF) | Events                           | Additional<br>features                                                                                                                                                                                                    | Others                                                                  |
|-------|-----|------------------|----------------|-----------------|-----------------|------------|----------|----|------|------------|-----------|-------------|-------------------|-------------------------|------------------------|----------------------------------|---------------------------------------------------------------------------------------------------------------------------------------------------------------------------------------------------------------------------|-------------------------------------------------------------------------|
| IV.1  | M   | Yes              |                | HCM<br>septal   | 15              | 22         | II       | -  | +    | 39         | +         | -           | -                 | + (35<br>exerc)         | -<br>(78)              |                                  | <b>ECG:</b><br>pathologic Q<br>wave, high<br>QRS voltage.<br><b>Holter:</b> VEB<br>rare, 1<br>episode of<br>NSVT (8<br>complex)<br><b>MRI:</b> LA 41<br>mm, mild<br>LVOTO, basal<br>fibrosis and<br>midseptal,<br>apical. | Compe<br>titive<br>athlete<br>football<br><br>ICD<br>implant<br>ed 22 y |
| III.5 | F   | Yes              | No             | Not<br>affected |                 | 44         | -        | -  | +    | -          | -         | -           |                   | -                       | -                      |                                  |                                                                                                                                                                                                                           |                                                                         |
| III.4 | M   | No               |                | Not<br>affected |                 | 46         | -        | -  | -    | -          | -         | -           |                   | -                       | -                      |                                  |                                                                                                                                                                                                                           |                                                                         |
| II.8  | M   | ?                |                | ?               |                 | 21         |          |    |      |            |           |             |                   |                         |                        | Sudden<br>death -<br>age 21<br>y |                                                                                                                                                                                                                           | During<br>military<br>activity                                          |

Abn BP resp, abnormal blood pressure response on exercise; AF, atrial fibrillation; Dx, diagnosis; DCM, dilated cardiomyopathy; ECG, electrocardiogram; Echo, echocardiogram; FHSD, family history of sudden death; HCM, hypertrophic cardiomyopathy; Id, individual; LA, left atrium; LGE, late gadolinium enhancement; LVH, left ventricular hypertrophy; LVOTO (peak grad), left ventricle outflow tract obstruction (gradient in mmHg); LV dysf (EF), systolic dysfunction (ejection fraction);

max LVH, left ventricular hypertrophy (maximal ventricular wall thickness in mm); MRI, magnetic resonance imaging; NYHA, New York Heart Association functional class; NCE, no clinical evaluation; NGT, no genetic testing; NSVT, nonsustained ventricular tachycardia; SCD, sudden cardiac death; VEB, ventricular ectopic beats; VT/VF, ventricular tachycardia/ventricular fibrillation. E1, TPM1 p.Arg21Leu. The index case is described in the gray line.

#### **Pedigree #7**

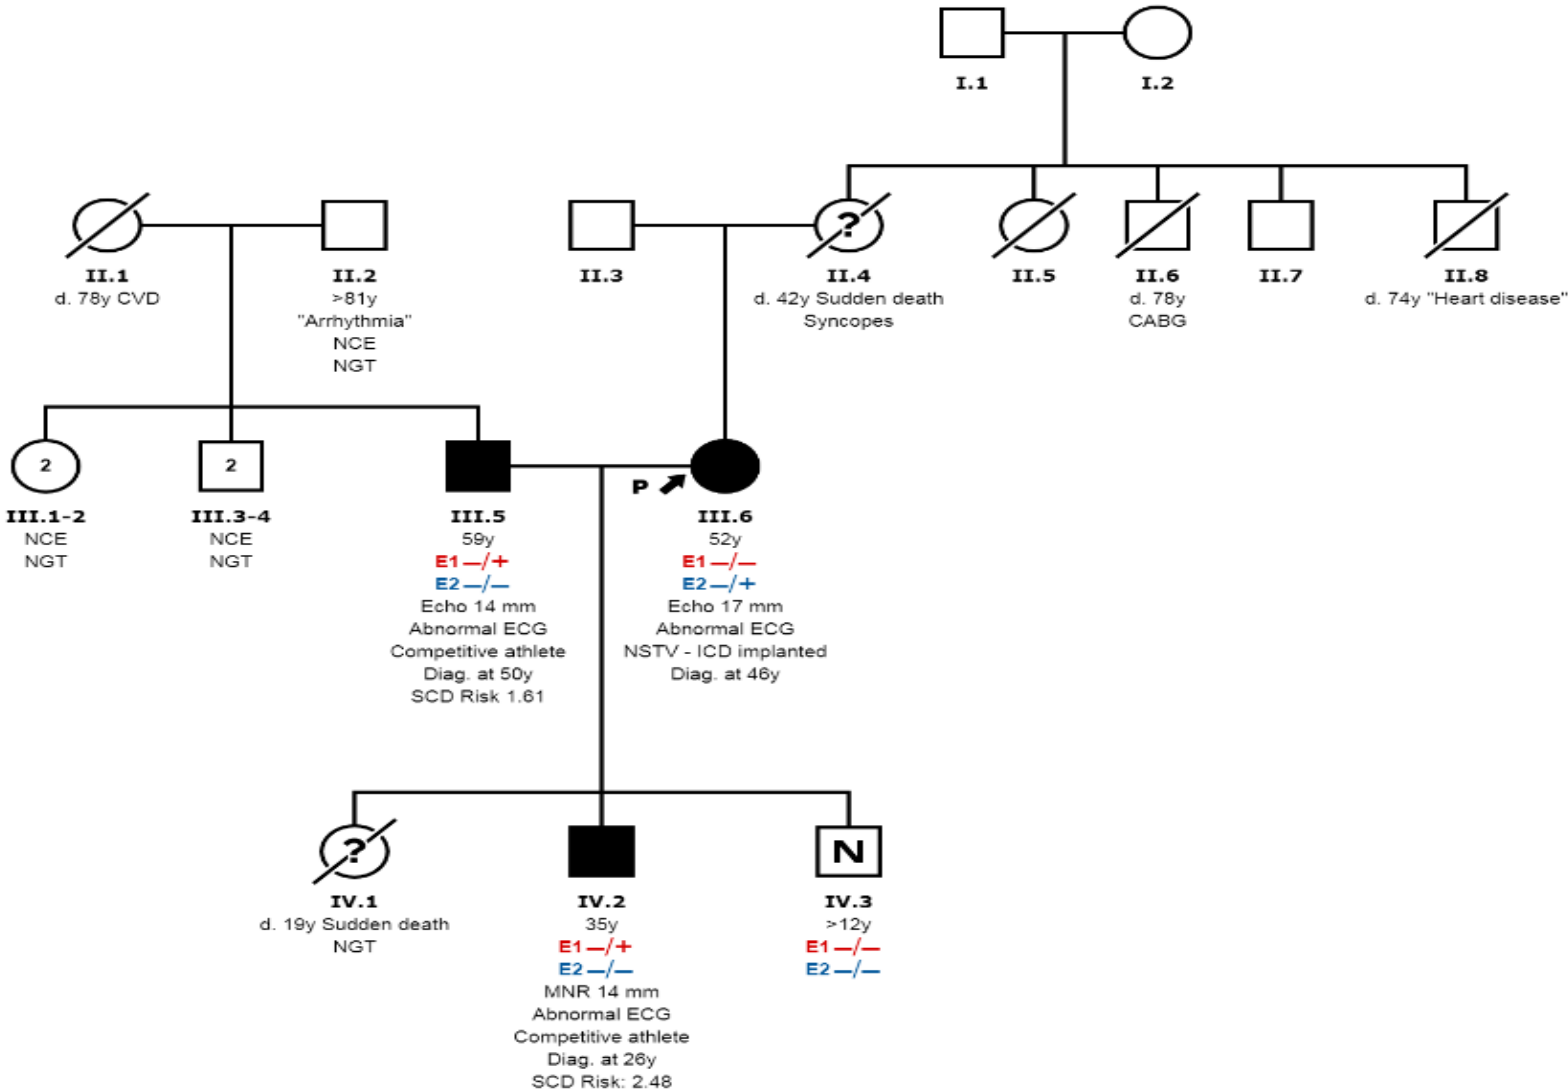

LOD SCORE: 0.17

| Id       | Sex | TPM1<br>Arg21Leu | Other<br>mutat                 | Phenoty<br>pe | Age<br>at<br>Dx | Age<br>, y | NY<br>HA | AF | FHSD | Max<br>LVH | TV/<br>FV | Sync<br>ope | Abn<br>BP<br>Resp | LVOTO<br>(Peak<br>grad) | LV Dysf<br>(EF) | Events                    | Additional<br>features                                                                                                     | Others                                |
|----------|-----|------------------|--------------------------------|---------------|-----------------|------------|----------|----|------|------------|-----------|-------------|-------------------|-------------------------|-----------------|---------------------------|----------------------------------------------------------------------------------------------------------------------------|---------------------------------------|
| III.6    | F   | No               | MYH7<br>Gly741<br>Arg<br>(+++) | HCM<br>septal | 46              | 52         | I        | -  | +    | 17         | +         | -           | -                 | -                       | -(61)           |                           | ECG: Low<br>QRS voltage,<br>inv T waves,<br>pathol. Q<br>waves<br>MNR: Late<br>enhancemen<br>t by fibrosis<br>Holter: NSVT | ICD<br>implanted<br>47 y              |
| III.5    | M   | Yes              |                                | HCM<br>septal | 50              | 59         | II       | -  | -    | 14         | -         | -           | -                 | -                       | -(58)           |                           | ECG:<br>Pathologic Q<br>waves                                                                                              | Competitiv<br>e athlete –<br>football |
| IV.<br>2 | M   | Yes              | No                             | HCM<br>septal | 26              | 35         | I        | -  | +    | 14         | -         | -           | -                 | -                       | -(75)           |                           | ECG: High<br>QRS voltage,<br>pathologic Q<br>waves                                                                         | Competitiv<br>e athlete –<br>football |
| IV.<br>1 | F   | NGT              |                                | SCD           |                 | 19         |          |    | +    |            | +         |             |                   |                         |                 | Sudden<br>death –<br>19 y |                                                                                                                            |                                       |

Abn BP resp, abnormal blood pressure response on exercise; AF, atrial fibrillation; Dx, diagnosis; DCM, dilated cardiomyopathy; ECG, electrocardiogram; Echo, echocardiogram; FHSD, family history of sudden death; HCM, hypertrophic cardiomyopathy; Id, individual; LA, left atrium; LGE, late gadolinium enhancement; LVH, left ventricular hypertrophy; LVOTO (peak grad), left ventricle outflow tract obstruction (gradient in mmHg); LV dysf (EF), systolic dysfunction (ejection fraction); max LVH, left ventricular hypertrophy (maximal ventricular wall thickness in mm); MRI, magnetic resonance imaging; NYHA, New York Heart Association functional class; NCE, no clinical evaluation; NGT, no genetic testing; NSVT, nonsustained ventricular tachycardia; SCD, sudden cardiac death; VEB, ventricular ectopic beats; VT/VF, ventricular tachycardia/ventricular fibrillation; E1, TPM1 p;Arg21Leu; E2, other variant (see table). The index case is described in the gray line;

#### Comments pedigree #7:

**1. Complex genotype:** Two pathogenic variants are associated with HCM in this family, but there is no carrier with both variants. The index case (III.6) had been evaluated after her daughter's (IV.1) sudden death, with a previous family history of sudden death in her mother (II.4). We could not determine the daughter's (IV.1) genotype; she could be carrier of both or of only 1 of the family's variants.

We consider **MYH7 p.Gly741Arg** to be a pathogenic variant. Gly741 is a hotspot residue with 3 likely pathogenic missense variants affecting multiple HCM patients (73 cases from 41 families in total).

**PS:** The sudden cardiac death reported in patient II.4 was not included in our survival analysis.

>> In this family, the index case (III.6) was studied by NGS panel; however, the familial variant in *MYH7* was not identified in her son (IV.2) by Sanger sequencing.

Therefore, individual IV.2 was tested with an NGS panel, which allowed the identification of the *TPM1* p.Arg21Leu.

**Pedigree #8**



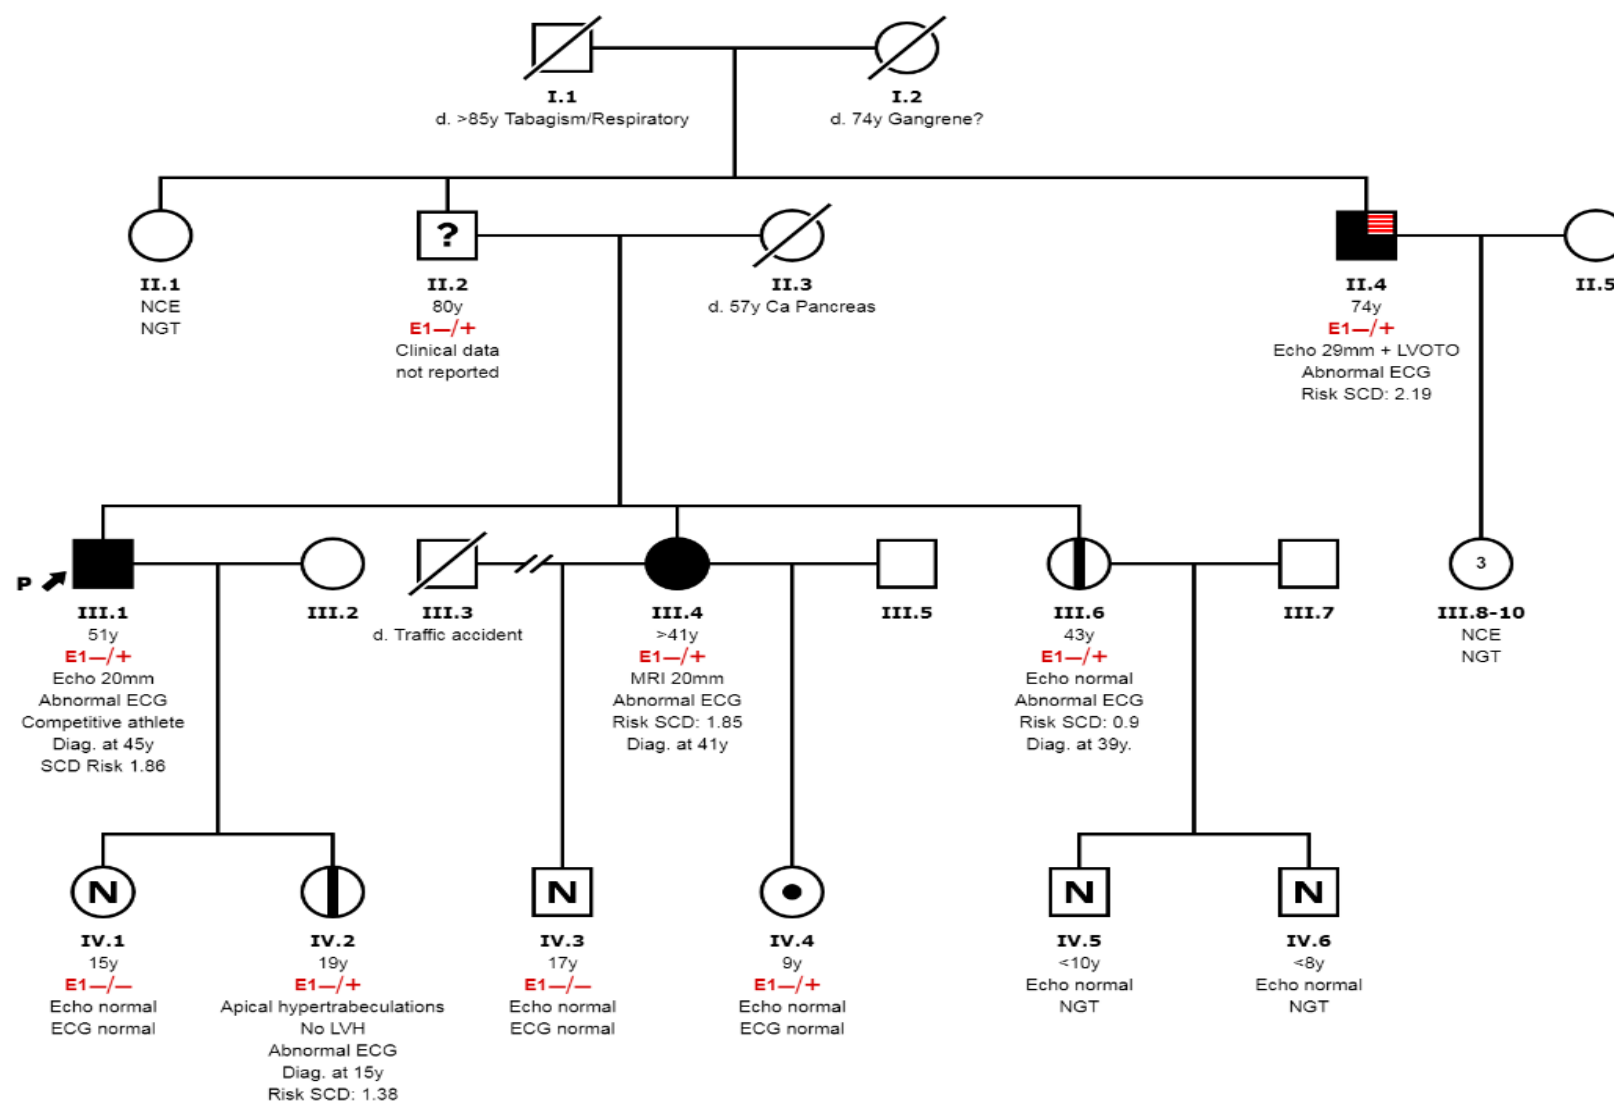

| Id    | Sex | TPM1<br>Arg21Leu | Other<br>mutat | Phenoty<br>pe          | Age<br>at Dx | Age,<br>y | NY<br>HA | AF | FH<br>SD | Max<br>LVH | TV/<br>FV | Sync<br>ope | Abn<br>BP<br>Resp | LVOTO<br>(Peak<br>grad) | LV<br>dysf<br>(EF) | Events | Additional<br>features                                                                                                                                                      | Others                                                       |
|-------|-----|------------------|----------------|------------------------|--------------|-----------|----------|----|----------|------------|-----------|-------------|-------------------|-------------------------|--------------------|--------|-----------------------------------------------------------------------------------------------------------------------------------------------------------------------------|--------------------------------------------------------------|
| III.1 | M   | Yes              | No             | HCM<br>septal          | 45           | 51        | I        | -  | -        | 20         | -         | -           | -                 | -                       | -(78)              |        | <b>ECG:</b> negative<br>T waves V <sub>1-6</sub> .<br><b>MRI:</b> LA 40<br>mm, extensive<br>LGE (6<br>segments)                                                             | Compe<br>titive<br>athlete                                   |
| III.4 | F   | Yes              |                | HCM<br>septal          | 41           | >41       | I        | -  | -        | 20         | -         | -           | -                 | -                       | -(78)              |        | <b>ECG:</b> negative<br>T waves V <sub>1-3</sub> ,<br>pathologic Q<br>waves V <sub>5-6</sub><br><b>MRI:</b> No<br>report of LGE                                             |                                                              |
| III.6 | F   | Yes              |                | Not<br>affected<br>(?) |              | 43        | I        | -  | -        | -          | -         | -           | -                 | -                       | -                  |        | <b>ECG:</b> altered R<br>wave V <sub>1-3</sub>                                                                                                                              |                                                              |
| II.4  | M   | Yes              |                | HCM<br>septal          | 48           | 74        | I        | +  | -        | 29         | -         | -           | -                 | +(60)                   | -(55)              |        | <b>Echo:</b> mild<br>mitral<br>insufficiency,<br>moderate<br>ascending<br>aortic<br>dilatation (47<br>mm)<br><b>ECG:</b><br>Paroxysmal<br>atrial<br>fibrillation, <i>in</i> | <b>Limb-<br/>girdle<br/>muscul<br/>ar<br/>dystro<br/>phy</b> |

*Revista Española de Cardiología*  
*Lamounier Junior A, et al. Genotype-phenotype correlations in hypertrophic cardiomyopathy:*  
*a multicenter study in Portugal and Spain of the TPM1 p.Arg21Leu variant*

|      |   |     |  |                        |  |    |   |   |   |   |   |   |   |   |       |  |                                                                                                                                                                                                                       |  |
|------|---|-----|--|------------------------|--|----|---|---|---|---|---|---|---|---|-------|--|-----------------------------------------------------------------------------------------------------------------------------------------------------------------------------------------------------------------------|--|
|      |   |     |  |                        |  |    |   |   |   |   |   |   |   |   |       |  | <i>sinus rhythm:</i><br>high QRS<br>voltages,<br>abnormal<br>repolarization,<br>VEB, LA 51mm<br><b>MRI:</b> Systolic<br>function<br>borderline,<br>LGE antero<br>septal, basal<br>and medial                          |  |
| IV.2 | F | Yes |  | Not<br>affected<br>(?) |  | 19 | I | - | - | - | - | - | - | - | -(62) |  | <b>Echo:</b> apical<br>hypertrabecul<br>ar (without<br>criteria for<br>NC)<br><b>ECG:</b><br>pathologic Q<br>wave inf and<br>V <sub>3-6</sub><br><b>Holter:</b> Rare<br>ectopic<br>ventricular<br>beats<br>multifocal |  |
| IV.4 | F | Yes |  | Not<br>affected        |  | 9  | - | - | - | 7 | - | - | - | - | -     |  |                                                                                                                                                                                                                       |  |
| II.2 | M | Yes |  | ?                      |  |    |   |   |   |   |   |   |   |   |       |  | <b>No data<br/>available</b>                                                                                                                                                                                          |  |

Abn BP resp, abnormal blood pressure response on exercise; AF, atrial fibrillation; Dx, diagnosis; DCM, dilated cardiomyopathy; ECG, electrocardiogram; Echo, echocardiogram; FHSD, family history of sudden death; HCM, hypertrophic cardiomyopathy; Id, individual; LA, left atrium; LGE, late gadolinium enhancement; LVH,

left ventricular hypertrophy; LVOTO (peak grad), left ventricle outflow tract obstruction (gradient in mmHg); LV dysf (EF), systolic dysfunction (ejection fraction); max LVH, left ventricular hypertrophy (maximal ventricular wall thickness in mm); MRI, magnetic resonance imaging; NYHA, New York Heart Association functional class; NCE, no clinical evaluation; NGT, no genetic testing; SCD, sudden cardiac death; VT/VF, ventricular tachycardia/ventricular fibrillation; E1, TPM1 p;Arg21Leu. The index case is described in the gray line.

**Comments pedigree #8:**

**1. Competitive sports:** Individual III.1 showed low SCD risk by ESC calculator, but showed extensive myocardial fibrosis (6 affected cardiac segments).

**Pedigree #9**

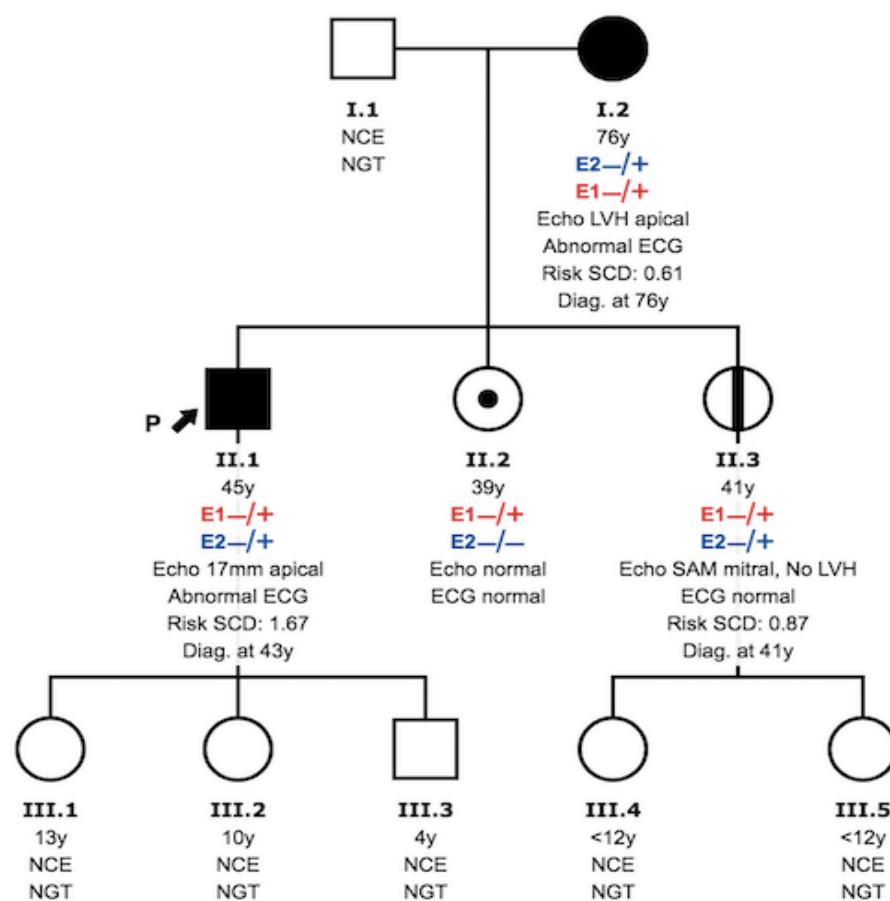

LOD SCORE: 0.34

| Id   | Sex | TPM1<br>Arg21Leu | Other mutat                 | Phenotype              | Age<br>at Dx | Age,<br>y | NY<br>HA | AF | FH<br>SD | Max<br>LVH | TV/<br>FV | Synco<br>pe | Abn<br>BP<br>Resp | LVOTO<br>(Peak<br>grad) | LV<br>Dysf<br>(EF) | Events | Additional<br>features                                                                                                   | Others |
|------|-----|------------------|-----------------------------|------------------------|--------------|-----------|----------|----|----------|------------|-----------|-------------|-------------------|-------------------------|--------------------|--------|--------------------------------------------------------------------------------------------------------------------------|--------|
| II.1 | M   | Yes              | TNNT2<br>Arg278Cys<br>(+++) | HCM<br>Apical          | 43           | 45        | I        | -  | -        | 17         | -         | -           | -                 | -                       | -(62)              |        | <b>Echo:</b> LA 40<br>mm.<br><br><b>MNR:</b> LGE<br>mesobasal,<br>anterior<br>septal, basal<br>anterior,<br>mesoinferior |        |
| II.2 | F   | Yes              | No                          | Not<br>affected        |              | 39        | -        | -  | -        | -          | -         | -           | -                 | -                       | -                  |        |                                                                                                                          |        |
| II.3 | F   | Yes              | TNNT2<br>Arg278Cys<br>(+++) | Not<br>affected<br>(?) |              | 41        | I        | -  | -        | -          | -         | -           | -                 | -                       | -                  |        | <b>Echo</b> SAM<br>mitral<br><br><b>ECG</b> normal<br><br><b>Echo:</b> SAM<br>mitral                                     |        |
| I.2  | F   | Yes              | TNNT2<br>Arg278Cys<br>(+++) | HCM<br>apical          | 76           | 76        | I        | -  | -        | +          | -         | -           | -                 | -                       | -                  |        | <b>ECG:</b><br>negative T<br>waves, high<br>voltages.<br><br><b>MNR:</b> no LGE                                          |        |

Abn BP resp, abnormal blood pressure response on exercise; AF, atrial fibrillation; Dx, diagnosis; DCM, dilated cardiomyopathy; ECG, electrocardiogram; Echo, echocardiogram; FHSD, family history of sudden death; HCM, hypertrophic cardiomyopathy; Id, individual; LA, left atrium; LGE, late gadolinium enhancement; LVH, left ventricular hypertrophy; LVOTO (peak grad), left ventricle outflow tract obstruction (gradient in mmHg); LV dysf (EF), systolic dysfunction (ejection fraction); max LVH, left ventricular hypertrophy (maximal ventricular wall thickness in mm); MRI, magnetic resonance imaging; NYHA, New York Heart Association functional class; NCE, no clinical evaluation; NGT, no genetic testing; SAH, systemic arterial hypertension; SCD, sudden cardiac death; VT/VF, ventricular tachycardia/ventricular fibrillation; E1, TPM1 p.Arg21Leu. The index case is described in the gray line

#### **Comments pedigree #9:**

**1. Complex genotypes:** Individuals II.1, II.3 and I.2 were carriers of a pathogenic *TNNI2* variant, and expressed relatively mild phenotypes.

We consider ***TNNI2* p.Arg278Cys** to be a pathogenic HCM-associated variant. It has been identified in more than 220 carriers from > 130 families.

The variant appears to be associated with late/incomplete penetrance and mild-moderate hypertrophies. This incomplete penetrance explains the presence of this variant in a relevant number of individuals in control populations (98 heterozygous carriers in the gnomAD database). Another 3 missense variants affecting the same amino acid p.Arg278Pro/Leu/His have also been identified in multiple HCM patients with a similar clinical profile. Among the > 130 families carrying variants in Arg278, we have reported 9 sudden deaths in carriers and 17 sudden deaths in first/second-degree relatives without genetic testing.

**Pedigree #10**



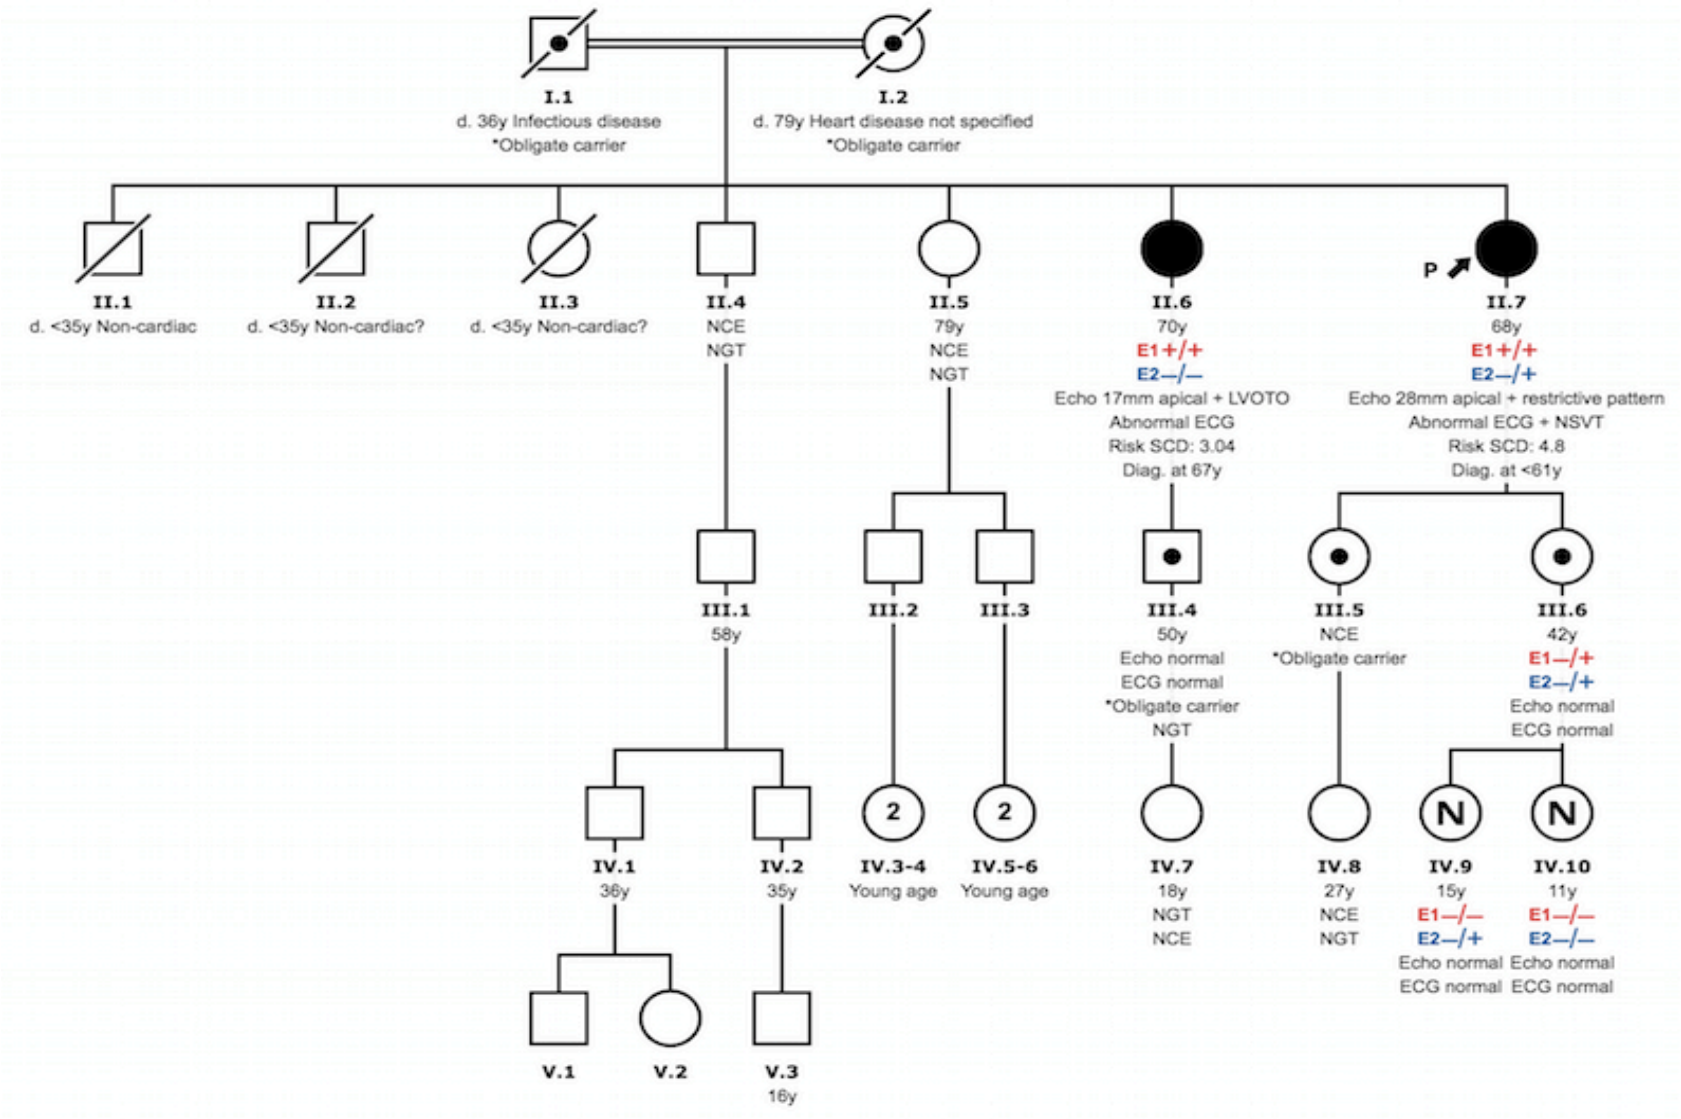

| Id   | Sex | TPM1<br>Arg21Leu | Other<br>mutat             | Phenoty<br>pe | Age<br>at Dx | Age, y | NY<br>HA | AF | FH<br>SD | Max<br>LVH | TV/<br>FV | Syncope | Abn<br>BP<br>Resp | LVOTO<br>(Peak<br>grad) | LV<br>Dysf<br>(EF) | Events | Additional<br>features                                                                                                                                                                                                                                      | Others  |
|------|-----|------------------|----------------------------|---------------|--------------|--------|----------|----|----------|------------|-----------|---------|-------------------|-------------------------|--------------------|--------|-------------------------------------------------------------------------------------------------------------------------------------------------------------------------------------------------------------------------------------------------------------|---------|
| II.7 | F   | Yes<br>(Homoz)   | MYBPC3<br>Asp75Asn<br>(+?) | HCM<br>Apical | <61          | 68     | III      | -  | -        | 28         | +         | -       | -                 | -                       | -(63)              |        | <b>Holter:</b> NSVT<br><b>Echo:</b><br>Restrictive<br>pattern<br><b>MRI:</b> LA 54<br>mm,<br>biventricular<br>LGE<br>(subepicardica<br>l, medium<br>mural, RV and<br>apical). LVH<br>medium<br>ventricular,<br>right<br>ventricular<br>and severe<br>apical | obesity |
| II.6 | F   | Yes<br>(Homoz)   | No                         | HCM<br>Apical | 67           | 70     | II       | -  | -        | 17         | -         | -       | -                 | + (118<br>at rest)      | -(64)              |        | <b>Holter:</b> rare<br>isolated VEBs<br><b>ECG:</b> mild<br>abnormal<br>repolarization<br><b>Echo:</b> LA 46<br>mm, diastolic                                                                                                                               |         |

|       |   |                     |                            |                                        |  |    |   |   |   |   |   |   |   |   |   |                                        |                                            |  |
|-------|---|---------------------|----------------------------|----------------------------------------|--|----|---|---|---|---|---|---|---|---|---|----------------------------------------|--------------------------------------------|--|
|       |   |                     |                            |                                        |  |    |   |   |   |   |   |   |   |   |   |                                        | dysfunction II,<br>mitral<br>regurgitation |  |
| III.6 | F | Yes                 | MYBPC3<br>Asp75Asn<br>(+?) | Not<br>affected                        |  | 42 | I | - | - | - | - | - | - | - | - |                                        |                                            |  |
| I.2   | F | Obligate<br>carrier | ?                          | Cardiac<br>disease<br>not<br>specified |  | 79 |   |   |   |   |   |   |   |   |   | Death<br>at 79 y<br>– heart<br>disease |                                            |  |
| I.1   | M | Obligate<br>carrier | ?                          | NCE                                    |  | 36 |   |   |   |   |   |   |   |   |   |                                        |                                            |  |
| III.4 | M | Obligate<br>carrier |                            | Not<br>affected                        |  | 50 | I | - | - | - | - | - | - | - | - |                                        |                                            |  |
| III.5 | F | Obligate<br>carrier |                            | NCE                                    |  |    |   |   |   |   |   |   |   |   |   |                                        |                                            |  |

Abn BP resp, abnormal blood pressure response on exercise; AF, atrial fibrillation; Dx, diagnosis; DCM, dilated cardiomyopathy; ECG, electrocardiogram; Echo, echocardiogram; FHSD, family history of sudden death; HCM, hypertrophic cardiomyopathy; Id, individual; LA, left atrium; LGE, late gadolinium enhancement; LVH, left ventricular hypertrophy; LVOTO (peak grad), left ventricle outflow tract obstruction (gradient in mmHg); LV dysf (EF), systolic dysfunction (ejection fraction); max LVH, left ventricular hypertrophy (maximal ventricular wall thickness in mm); MRI, magnetic resonance imaging; NYHA, New York Heart Association functional class; NCE, no clinical evaluation; NGT, no genetic testing; NSVT, nonsustained ventricular tachycardia; SCD, sudden cardiac death; VEB, ventricular ectopic beats; VT/VF, ventricular tachycardia/ventricular fibrillation; E1, TPM1 p.Arg21Leu; E2, other variant (see table); the index case is described in the gray line;

### Comments pedigree #10:

**1. Complex genotypes:** TPM1 p.Arg21Leu homozygous sisters (II.7 and II.6) showed severe phenotypes although diagnosed at advanced ages. The homozygous carrier II.7 had a more marked phenotype that may be related to the presence of an additional likely pathogenic variant in MYBPC3. In contrast, his 42-year-old daughter (III.6), clinically unaffected, was a compound heterozygous carrier of TPM1 p.Arg21Leu and MYBPC3 p.Asp75Asn variants.

We consider **MYBPC3 p.Asp75Asn** to be a likely rare pathogenic variant (4 carriers in the gnomAD database). This variant has been identified in HCM index cases, and familial studies showed the presence of both affected and unaffected carriers, suggesting late/incomplete penetrance.

#### **Pedigree #11**

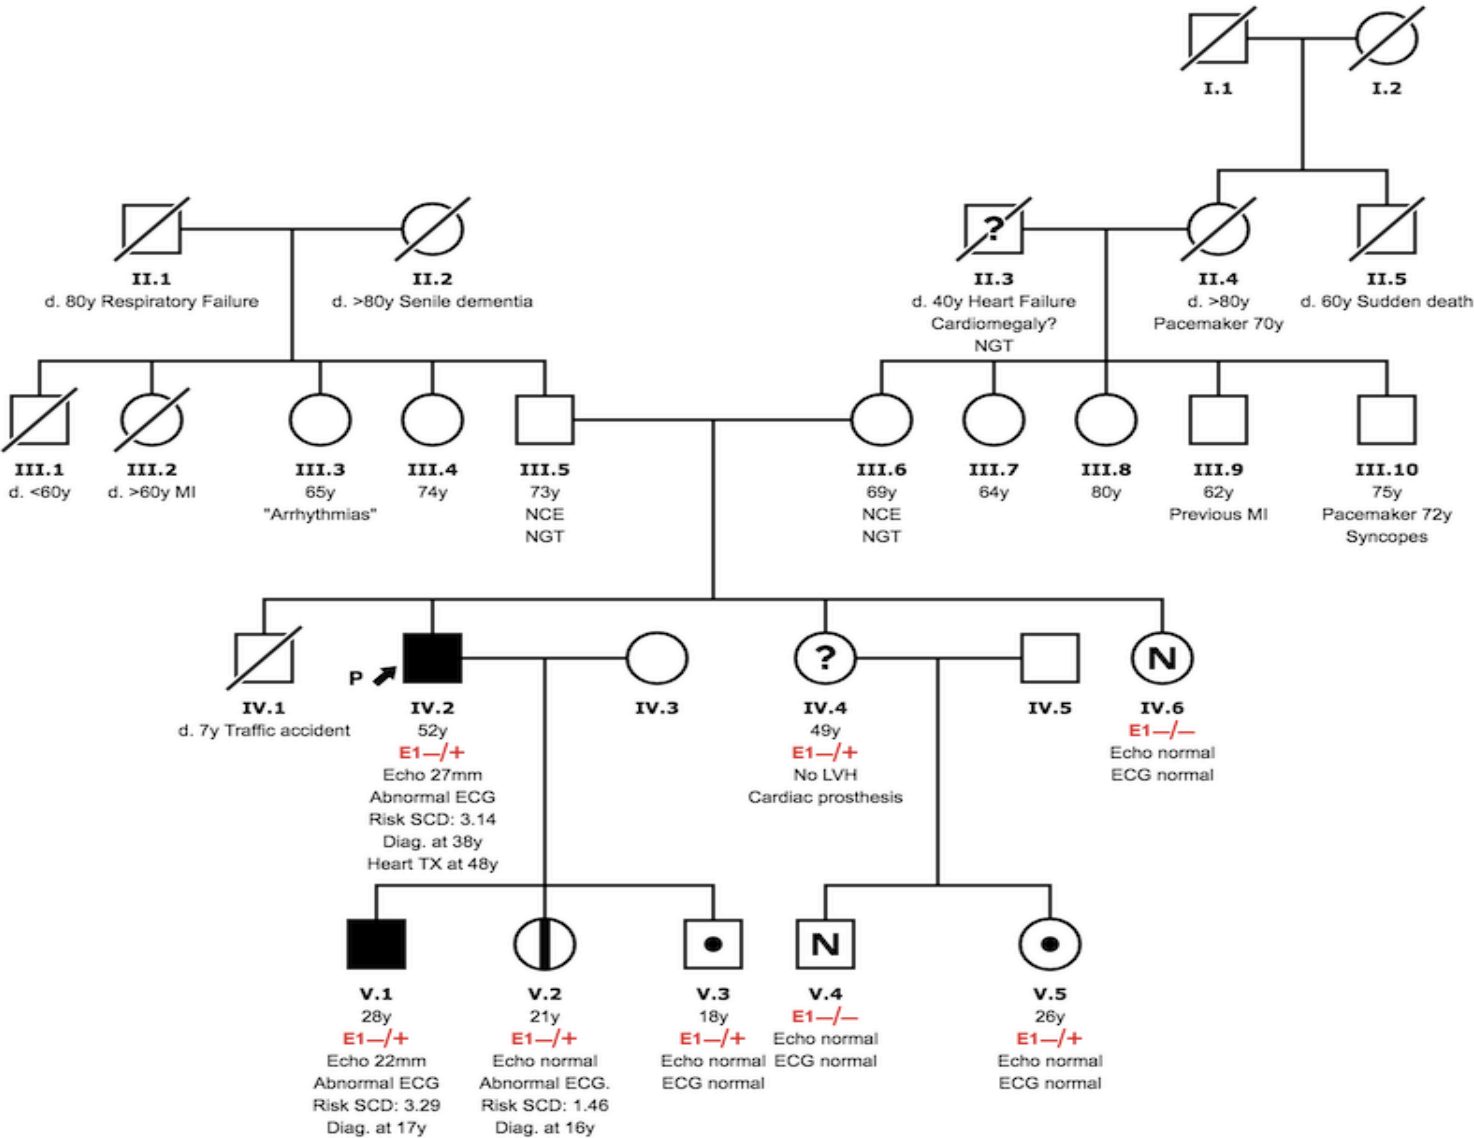

| Id   | Sex | TPM1<br>Arg21Leu | Other<br>mutat | Phenotype        | Age<br>at Dx | Age,<br>y | NYHA   | AF | FH<br>SD | Max<br>LVH | TV/<br>FV | Syncope | Abn<br>BP<br>Resp | LVOTO<br>(Peak<br>grad) | LV<br>Dysf<br>(EF) | Events                     | Additional<br>features                                                        | Others                                |
|------|-----|------------------|----------------|------------------|--------------|-----------|--------|----|----------|------------|-----------|---------|-------------------|-------------------------|--------------------|----------------------------|-------------------------------------------------------------------------------|---------------------------------------|
| IV.2 | M   | Yes              | No             | HCM septal       | 38           | 52        | III-IV | +  | -        | 27         | -         | -       | -                 | -                       | -(65)              | Heart transplant at 48 y   | <b>Echo:</b> LA 58mm, diastolic dysfunction II.<br><b>ECG:</b> Atrial Flutter |                                       |
| IV.4 | F   | Yes              |                | ?                |              | 49        |        |    |          |            |           |         |                   |                         |                    |                            |                                                                               | Valvular cardiac disease - prosthesis |
| V.1  | M   | Yes              |                | HCM septal       | 17           | 28        | I      | -  | -        | 22         | -         | -       | -                 | -                       | -(72)              |                            | <b>Echo:</b> LA 46mm<br><b>ECG:</b> negative T waves, high QRS voltages       |                                       |
| V.2  | F   | Yes              |                | Not affected (?) |              | 21        | I      | -  | -        | 11         | -         | -       | -                 | -                       | -                  |                            | <b>ECG:</b> high QRS voltage, Q waves                                         |                                       |
| V.3  | M   | Yes              |                | Not affected     |              | 18        |        |    |          |            |           |         |                   |                         |                    |                            |                                                                               |                                       |
| V.5  | F   | Yes              |                | Not affected     |              | 26        |        |    |          |            |           |         |                   |                         |                    |                            |                                                                               |                                       |
| II.3 | M   | NGT              |                | ?                |              | 40        |        |    |          |            |           |         |                   |                         |                    | Heart failure death at 40y |                                                                               |                                       |

Abn BP resp, abnormal blood pressure response on exercise; AF, atrial fibrillation; Dx, diagnosis; DCM, dilated cardiomyopathy; ECG, electrocardiogram; Echo, echocardiogram; FHSD, family history of sudden death; HCM, hypertrophic cardiomyopathy; Id, individual; LA, left atrium; LGE, late gadolinium enhancement; LVH, left ventricular hypertrophy; LVOTO (peak grad), left ventricle outflow tract obstruction (gradient in mmHg); LV dysf (EF), systolic dysfunction (ejection fraction); max LVH, left ventricular hypertrophy (maximal ventricular wall thickness in mm); MRI, magnetic resonance imaging; NYHA, New York Heart Association functional class; NCE, no clinical evaluation; NGT, no genetic testing; NSVT, nonsustained ventricular tachycardia; SCD, sudden cardiac death; VT/VF, ventricular tachycardia/ventricular fibrillation; E1, TPM1 p.Arg21Leu. The index case is described in the gray line.

## **Pedigree #12**

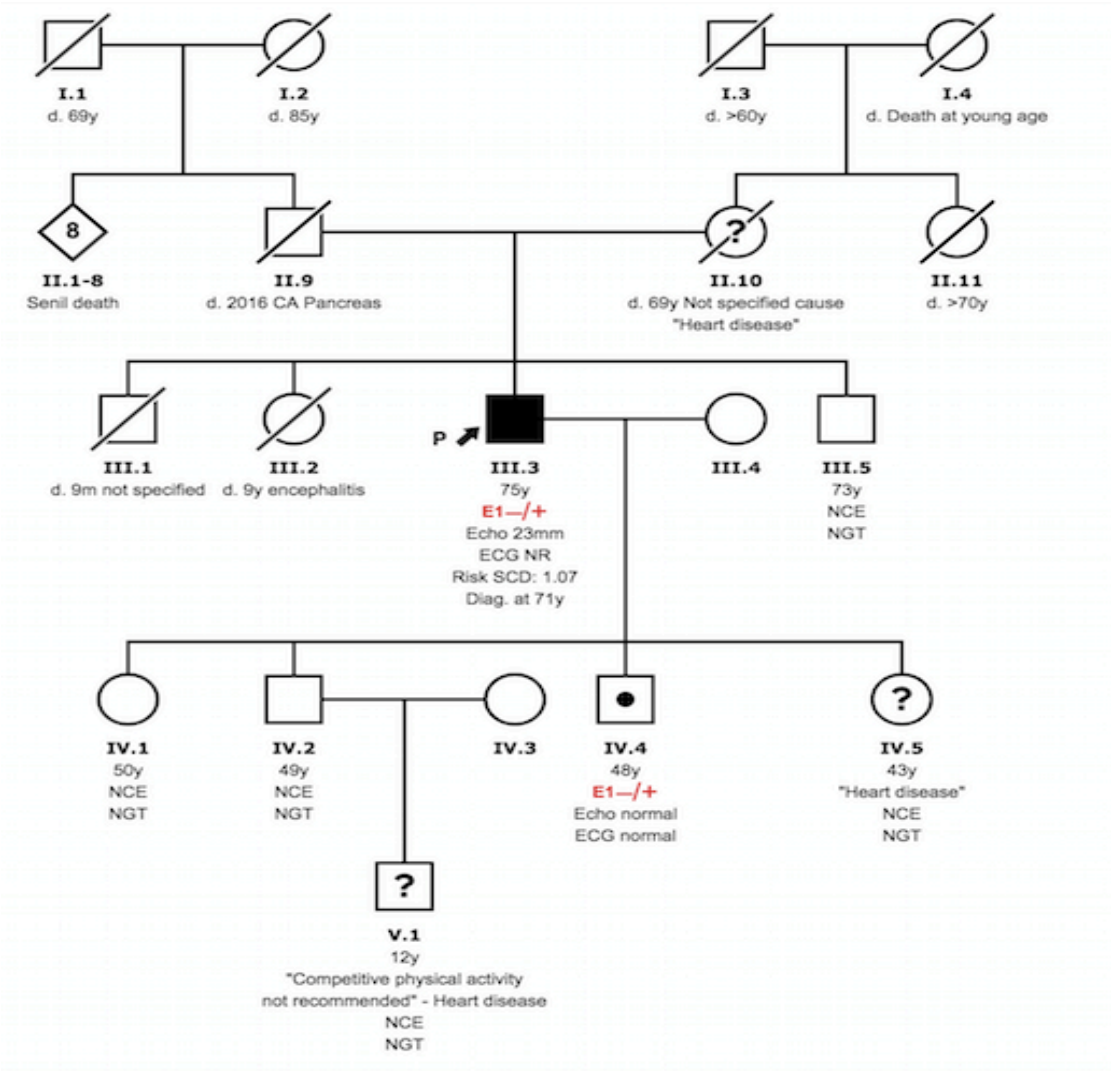



| Id        | Sex | TPM1<br>Arg21Leu | Other<br>mutat | Phenoty<br>pe                        | Age<br>at Dx | Age<br>, y | NY<br>HA | AF | FH<br>SD | Max<br>LVH | TV/<br>FV | Synco<br>pe | Abn<br>Vasc<br>Resp | LVOTO<br>(Peak<br>grad) | LV<br>Dysf<br>(EF) | Events | Additional<br>features | Others                                                   |
|-----------|-----|------------------|----------------|--------------------------------------|--------------|------------|----------|----|----------|------------|-----------|-------------|---------------------|-------------------------|--------------------|--------|------------------------|----------------------------------------------------------|
| III.1     | M   | Yes              | No             | HCM<br>septal                        | 71           | 75         | I        | -  | -        | 23         | -         | -           | +                   | -                       | -(67)              |        |                        |                                                          |
| IV.4      | M   | Yes              |                | Not<br>affected                      |              | 48         |          |    |          |            |           |             |                     |                         |                    |        |                        |                                                          |
| II.1<br>0 | F   | NGT              |                | Heart<br>disease<br>not<br>specified |              | 69         |          |    |          |            |           |             |                     |                         |                    |        |                        | Death at 69 y<br>– unspecified<br>cause.                 |
| IV.5      | F   | NGT              |                | Heart<br>disease<br>not<br>specified |              | 43         |          |    |          |            |           |             |                     |                         |                    |        |                        |                                                          |
| V.1       | M   | NGT              |                | Heart<br>disease<br>not<br>specified |              | 12         |          |    |          |            |           |             |                     |                         |                    |        |                        | “Competitive<br>physical activity<br>not<br>recommended” |

Abn BP resp, abnormal blood pressure response on exercise; AF, atrial fibrillation; Dx, diagnosis; DCM, dilated cardiomyopathy; ECG, electrocardiogram; Echo, echocardiogram; FHSD, family history of sudden death; HCM, hypertrophic cardiomyopathy; Id, individual; LA, left atrium; LGE, late gadolinium enhancement; LVH, left ventricular hypertrophy; LVOTO (peak grad), left ventricle outflow tract obstruction (gradient in mmHg); LV dysf (EF), systolic dysfunction (ejection fraction); max LVH, left ventricular hypertrophy (maximal ventricular wall thickness in mm); MRI, magnetic resonance imaging; NYHA, New York Heart Association functional class; NCE, no clinical evaluation; NGT, no genetic testing; NSVT, nonsustained ventricular tachycardia; SCD, sudden cardiac death; VT/VF, ventricular tachycardia/ventricular fibrillation; E1, TPM1 p.Arg21Leu. The index case is described in the gray line.

**Pedigree #13**

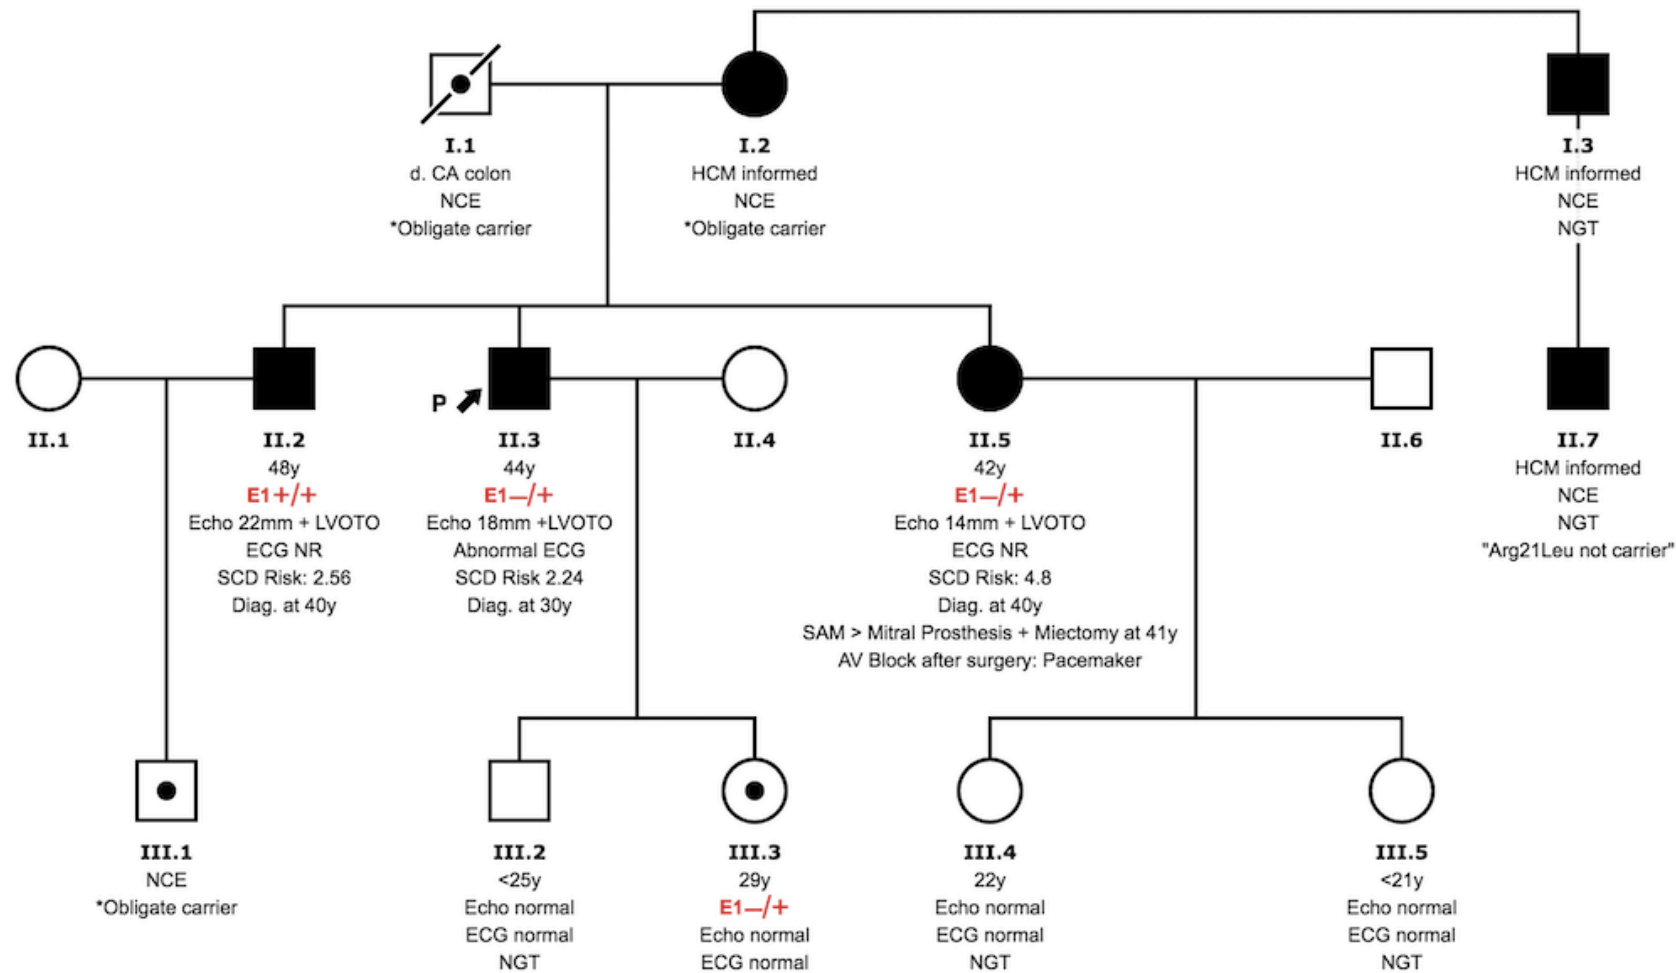

LOD SCORE: 0.34

Revista Española de Cardiología

Lamounier Junior A, et al. Genotype-phenotype correlations in hypertrophic cardiomyopathy:  
a multicenter study in Portugal and Spain of the TPM1 p.Arg21Leu variant

| Id   | Sex | TPM1<br>Arg21Leu | Other<br>mutat | Phenotype  | Age at<br>Dx | Age,<br>y | NYHA | AF | FH<br>SD | Max<br>LVH | TV/<br>FV | Syncop<br>e | Abn<br>BP<br>Resp | LVOT<br>O<br>(Peak<br>grad) | LV<br>Dysf<br>(EF) | Events | Additional<br>features                                                                                                      | Others                                                                                |
|------|-----|------------------|----------------|------------|--------------|-----------|------|----|----------|------------|-----------|-------------|-------------------|-----------------------------|--------------------|--------|-----------------------------------------------------------------------------------------------------------------------------|---------------------------------------------------------------------------------------|
| II.3 | M   | Yes              | No             | HCM septal | 30           | 44        | I    | -  | -        | 18         | -         | -           | +                 | +(60)                       | -(68)              |        | <b>Echo:</b> LA 40mm, diastolic dysfunction I.<br><b>ECG:</b> pathologic Q wave, abnormal repolarization, high QRS voltages |                                                                                       |
| II.2 | M   | Yes<br>(Homozy)  |                | HCM septal | 38           | 48        | I    | -  | -        | 22         | -         | -           | -                 | +(40)                       | -(70)              |        | <b>Echo:</b> LA 45 mm                                                                                                       |                                                                                       |
| II.5 | M   | Yes              |                | HCM septal | 40           | 42        | III  | +  | -        | 14         | -         | +           | -                 | +(75)                       | -(68)              |        | <b>Echo:</b> elongated mitral valve leaflet, mitral insufficiency                                                           | Myectomy and mitral valvular prosthesis at 41 y<br>Pacemaker (AV block) after surgery |

|       |   |                  |  |                    |  |    |  |  |  |  |  |  |  |  |  |  |  |  |
|-------|---|------------------|--|--------------------|--|----|--|--|--|--|--|--|--|--|--|--|--|--|
| III.3 | F | Yes              |  | Not affected       |  | 29 |  |  |  |  |  |  |  |  |  |  |  |  |
| I.1   | M | Obligate carrier |  | NCE                |  |    |  |  |  |  |  |  |  |  |  |  |  |  |
| I.2   | F | Obligate carrier |  | HCM reported – NCE |  | 71 |  |  |  |  |  |  |  |  |  |  |  |  |
| III.1 | M | Obligate carrier |  | NCE                |  |    |  |  |  |  |  |  |  |  |  |  |  |  |

Abn BP resp, abnormal blood pressure response on exercise; AF, atrial fibrillation; AV, atrioventricular; Dx, diagnosis; DCM, dilated cardiomyopathy; ECG, electrocardiogram; Echo, echocardiogram; FHSD, family history of sudden death; HCM, hypertrophic cardiomyopathy; Id, individual; LA, left atrium; LGE, late gadolinium enhancement; LVH, left ventricular hypertrophy; LVOTO (peak grad), left ventricle outflow tract obstruction (gradient in mmHg); LV dysf (EF), systolic dysfunction (ejection fraction); max LVH, left ventricular hypertrophy (maximal ventricular wall thickness in mm); MRI, magnetic resonance imaging; NYHA, New York Heart Association functional class; NCE, no clinical evaluation; NGT, no genetic testing; NSVT, nonsustained ventricular tachycardia; SCD, sudden cardiac death; VT/VF, ventricular tachycardia/ventricular fibrillation; E1, TPM1 p.Arg21Leu. E2, other variant (see table). The index case is described in the gray line.

Comments pedigree #13:

There is the chance of 2 HCM-genetic etiologies in this family. Individual II.7 was studied in another center and reported as being affected by hypertrophic cardiomyopathy, but “p.Arg21Leu noncarrier”. No details about the genetic testing or phenotype were reported in this patient.

Revista Española de Cardiología

Lamounier Junior A, et al. Genotype-phenotype correlations in hypertrophic cardiomyopathy:  
a multicenter study in Portugal and Spain of the TPM1 p.Arg21Leu variant

| Id | Sex | TPM1<br>Arg21Leu | Other<br>mutat | Phenotype  | Age<br>at<br>Dx | Age,<br>y | NYHA | AF | FH<br>SD | Max<br>LVH | TV/<br>FV<br>VE | Syncope | Abn<br>Vasc<br>Resp | LVOT<br>O<br>(Peak<br>grad) | LV<br>Dysf<br>(EF) | Events | Additional<br>features                                                                 | Others                      |
|----|-----|------------------|----------------|------------|-----------------|-----------|------|----|----------|------------|-----------------|---------|---------------------|-----------------------------|--------------------|--------|----------------------------------------------------------------------------------------|-----------------------------|
|    | M   | Yes              | No             | HCM apical | 69              | 72        | I    | -  | -        | 14         | -               | -       | -                   | -                           | -(67)              |        | <b>Echo:</b> LA 46 mm.<br><br><b>MRI:</b> LVH 11 mm septal, LGE septum inferior apical | PTCA Right coronary artery. |

Pedigree #14

Abn BP resp, abnormal blood pressure response on exercise; AF, atrial fibrillation; Dx, diagnosis; DCM, dilated cardiomyopathy; ECG, electrocardiogram; Echo, echocardiogram; FHSD, family history of sudden death; HCM, hypertrophic cardiomyopathy; Id, individual; LA, left atrium; LGE, late gadolinium enhancement; LVH, left ventricular hypertrophy; LVOTO (peak grad), left ventricle outflow tract obstruction (gradient in mmHg); LV dysf (EF), systolic dysfunction (ejection fraction); max LVH, left ventricular hypertrophy (maximal ventricular wall thickness in mm); MRI, magnetic resonance imaging; NYHA, New York Heart Association functional class; NCE, no clinical evaluation; NGT, no genetic testing; NSVT, nonsustained ventricular tachycardia; PTCA, percutaneous transluminal coronary angioplasty; SCD, sudden cardiac death; VT/VF, ventricular tachycardia/ventricular fibrillation. The index case is described in the gray line.

#### **SCD risk: 1.04**

No pedigree was reported (no pedigree image).

#### **Pedigree #15**

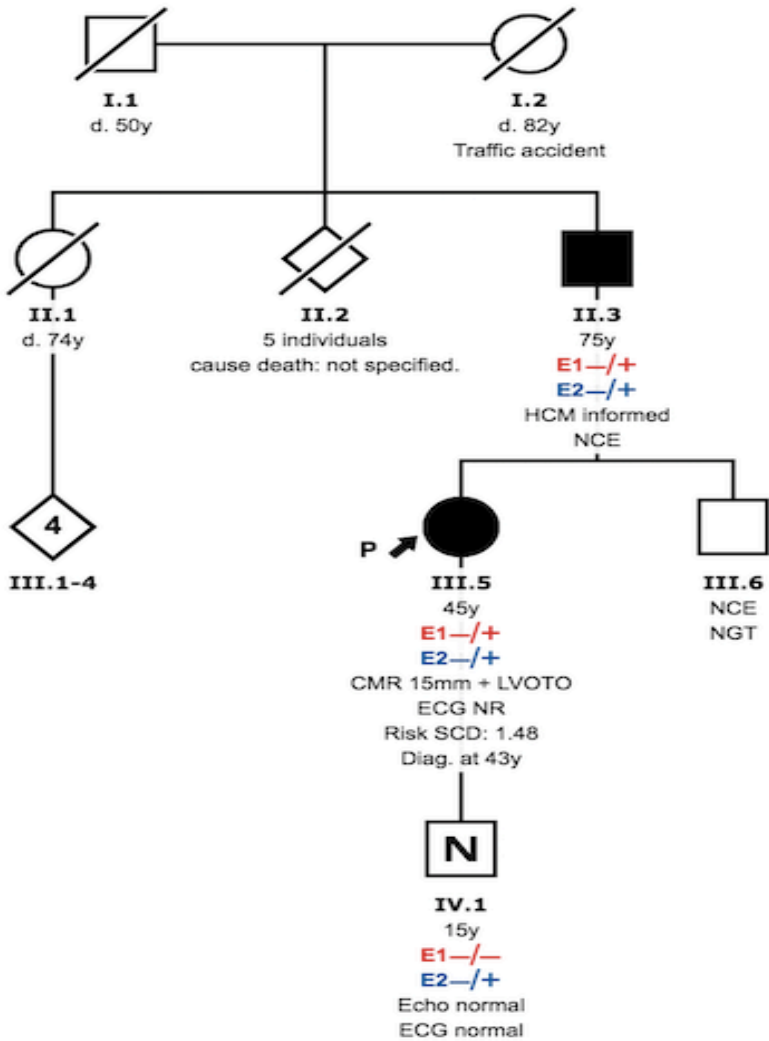



| Id   | Sex | TPM1<br>Arg21Leu | Other<br>mutat            | Phenoty<br>pe   | Age<br>at Dx | Age,<br>y | NYHA | AF | FH<br>SD | Max<br>LVH | TV/<br>FV | Synco<br>pe | Abn<br>BP<br>Resp | LVOTO<br>(Peak<br>grad) | LV<br>Dysf<br>(EF) | Events | Additional<br>features                                                                                            | Others |
|------|-----|------------------|---------------------------|-----------------|--------------|-----------|------|----|----------|------------|-----------|-------------|-------------------|-------------------------|--------------------|--------|-------------------------------------------------------------------------------------------------------------------|--------|
| II.1 | F   | Yes              | MYL3<br>Met173Val<br>(+?) | HCM<br>septal   | 43           | 45        | II   | -  | -        | 15         | -         | -           | -                 | +(>30)                  | -(66)              |        | MRI: Mild<br>intramural<br>LGE in the<br>hypertroph<br>y areas and<br>in the<br>insertion of<br>the RV with<br>LV | SAH.   |
| II.3 | M   | Yes              | MYL3<br>Met173Val<br>(+?) | HCM<br>reported |              | 75        |      |    |          | +          |           |             |                   |                         |                    |        |                                                                                                                   |        |

Abn BP resp, abnormal blood pressure response on exercise; AF, atrial fibrillation; Dx, diagnosis; DCM, dilated cardiomyopathy; ECG, electrocardiogram; Echo, echocardiogram; FHSD, family history of sudden death; HCM, hypertrophic cardiomyopathy; Id, individual; LA, left atrium; LGE, late gadolinium enhancement; LVH, left ventricular hypertrophy; LVOTO (peak grad), left ventricle outflow tract obstruction (gradient in mmHg); LV dysf (EF), left ventricle systolic dysfunction (ejection fraction); max LVH, left ventricular hypertrophy (maximal ventricular wall thickness in mm); MRI, magnetic resonance imaging; NYHA, New York Heart Association functional class; NCE, no clinical evaluation; NGT, no genetic testing; NSVT, nonsustained ventricular tachycardia; SAH, Systemic arterial hypertension; RV, Right ventricle; SCD, sudden cardiac death; VT/VF, ventricular tachycardia/ventricular fibrillation; E1, TPM1 p;Arg21Leu; E2, other variant (see table). The index case is described in the gray line.

#### **Comments pedigree #15:**

**1. Complex genotypes:** There are 2 carriers with complex genotype in this pedigree, but individual II.3 was studied in another center and no clinical details could be obtained.

We consider **MYL3 p.Met173Val** to be a likely pathogenic variant (+?) that has been associated with the development of hypertrophic cardiomyopathy (28 carriers from 14 families—half of them either unaffected or with unknown phenotype; consequently, familial cosegregating has not been clearly documented). It is present in a single individual from the gnomAD database (control). A functional study suggesting a damaging effect has been published. Data suggest that this variant could be associated with late disease onset and incomplete penetrance.

**Pedigree #16**

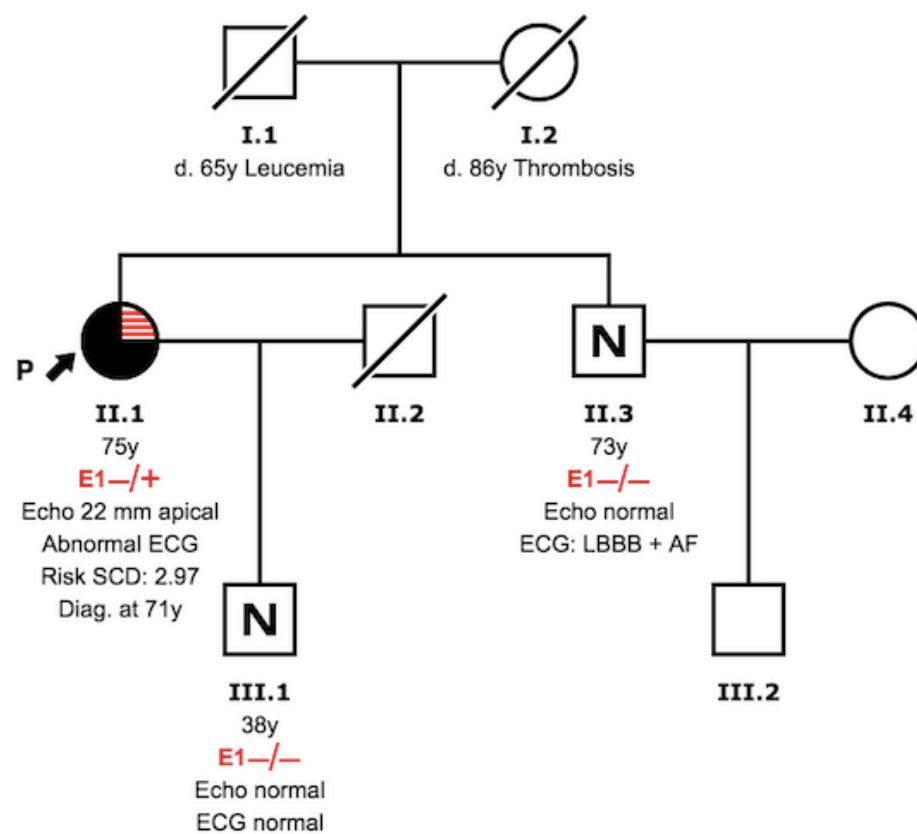

| Id.  | Sex | TPM1<br>Arg21Leu | Other<br>mutat | Pheno<br>type | Age<br>at Dx | Age<br>, y | NYHA | AF | FH<br>SD | Max<br>LVH | TV/<br>FV<br>VE | Sync<br>ope | Abn<br>BP<br>Resp | LVOTO<br>(Peak<br>grad) | LV<br>Dysf<br>(EF) | Events | Additional<br>features                                                                                                                                                                                                      | Others                                                                   |
|------|-----|------------------|----------------|---------------|--------------|------------|------|----|----------|------------|-----------------|-------------|-------------------|-------------------------|--------------------|--------|-----------------------------------------------------------------------------------------------------------------------------------------------------------------------------------------------------------------------------|--------------------------------------------------------------------------|
| II.1 | F   | Yes              | No             | HCM<br>apical | 71           | 75         | II   | +  | -        | 22         | -               | +           | -                 | -                       | -(82)              |        | <b>Echo:</b> LA 47<br>mm, moderate<br>mitral<br>insufficiency<br>and mild<br>tricuspid<br>insufficiency.<br><br><b>ECG:</b> <i>in sinus</i><br>negative T<br>waves, high QRS<br>voltage. Atrial<br>flutter/<br>fibrillation | SAH<br><br><b>Retinitis<br/>pigmentosa<br/>(bilateral<br/>blindness)</b> |

Abn BP resp, abnormal blood pressure response on exercise; AF, atrial fibrillation; Dx, diagnosis; DCM, dilated cardiomyopathy; ECG, electrocardiogram; Echo, echocardiogram; FHSD, family history of sudden death; HCM, hypertrophic cardiomyopathy; Id, individual; LA, left atrium; LGE, late gadolinium enhancement; LVH, left ventricular hypertrophy; LVOTO (peak grad), left ventricle outflow tract obstruction (gradient in mmHg); LV dysf (EF), systolic dysfunction (ejection fraction); max LVH, left ventricular hypertrophy (maximal ventricular wall thickness in mm); MRI, magnetic resonance imaging; NYHA, New York Heart Association functional class; NCE, no clinical evaluation; NGT, no genetic testing; NSVT, nonsustained ventricular tachycardia; SAH, Systemic arterial hypertension; SCD, sudden cardiac death; VT/VF, ventricular tachycardia/ventricular fibrillation; E1, TPM1 p.Arg21Leu. The index case is described in the gray line.

**Pedigree #17**

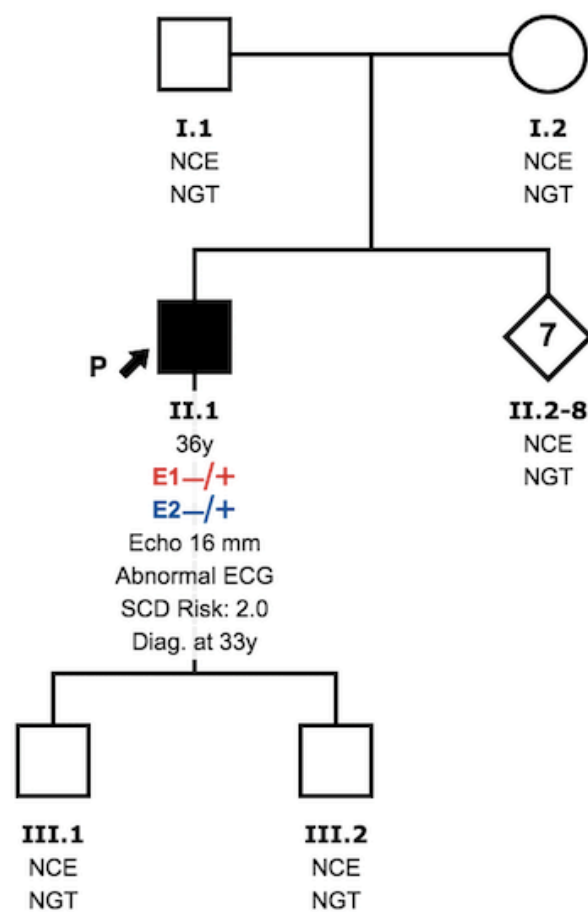

| Id   | Sex | TPM1<br>Arg21Leu | Other<br>mutat            | Phenoty<br>pe | Age<br>at Dx | Age<br>, y | NYHA | AF | FH<br>SD | Max<br>LVH | TV/<br>FV | Synco<br>pe | Abn<br>BP<br>Resp | LVOTO<br>(Peak<br>grad) | LV<br>Dysf<br>(EF) | Events | Additional<br>features                  | Others   |
|------|-----|------------------|---------------------------|---------------|--------------|------------|------|----|----------|------------|-----------|-------------|-------------------|-------------------------|--------------------|--------|-----------------------------------------|----------|
| II.1 | M   | Yes              | MYH7<br>Lys351As<br>n (?) | HCM<br>septal | 33           | 36         | I    | -  | -        | 16         | -         | -           | -                 | -(17)                   | -(84)              |        | Echo: LA<br>42 mm<br><br>ECG:<br>normal | Mild SAH |

Abn BP resp, abnormal blood pressure response on exercise; AF, atrial fibrillation; Dx, diagnosis; DCM, dilated cardiomyopathy; ECG, electrocardiogram; Echo, echocardiogram; FHSD, family history of sudden death; HCM, hypertrophic cardiomyopathy; Id, individual; LA, left atrium; LGE, late gadolinium enhancement; LVH, left ventricular hypertrophy; LVOTO (peak grad), left ventricle outflow tract obstruction (gradient in mmHg); LV dysf (EF), systolic dysfunction (ejection fraction); max LVH, left ventricular hypertrophy (maximal ventricular wall thickness in mm); MRI, magnetic resonance imaging; NYHA, New York Heart Association functional class; NCE, no clinical evaluation; NGT, no genetic testing; NSVT, nonsustained ventricular tachycardia; SAH, Systemic arterial hypertension; SCD, sudden cardiac death; VT/VF, ventricular tachycardia/ventricular fibrillation; E1, TPM1 p.Arg21Leu. E2, other variant (see table). The index case is described in the gray line.

### Comments:

- 1. Complex genotype:** The young age at diagnosis of this carrier (II.1) could be related to the presence of the MYH7 variant; however, he did not have a severe phenotype.



We consider **MYH7 p.Lys351Asn** to be a variant of unknown clinical significance (?). It has been described to date in this single HCM-patient, and also in a single carrier from the gnomAD population (control). Two missense variants located at the same amino acid (p.Lys351Glu/Thr) have been identified in HCM cases (6 unrelated carriers).

**Pedigree #18**

| Id | Sex | TPM1 Arg21Leu | Other mutat | Phenotyp e | Age at Dx | Age , y | NYH A | AF | FH SD | Max LVH | TV / FV | Synco pe | Abn BP Resp | LVOTO (Peak grad) | LV Dysf (EF) | Events | Additional features                                                                                                                     | Others                                             |
|----|-----|---------------|-------------|------------|-----------|---------|-------|----|-------|---------|---------|----------|-------------|-------------------|--------------|--------|-----------------------------------------------------------------------------------------------------------------------------------------|----------------------------------------------------|
|    | M   | Yes           | No          | HCM septal | 13        | 32      | III   | -  | -     | 51      | -       | +        | +           | +(140)            | -(55)        |        | <b>Echo:</b> LA 47 mm, RA enlarged, severe mitral regurgitatio on, SAM. Wave S <8 (tissue Doppler)<br><br><b>ECG:</b> High QRS voltages | Myectomy.<br><br>Primary prevention– ICD implanted |

Abn BP resp, abnormal blood pressure response on exercise; AF, atrial fibrillation; Dx, diagnosis; DCM, dilated cardiomyopathy; ECG, electrocardiogram; Echo, echocardiogram; FHSD, family history of sudden death; HCM, hypertrophic cardiomyopathy; Id, individual; ICD, implanted cardiofibrillator; LA, left atrium; LGE, late gadolinium enhancement; LVH, left ventricular hypertrophy; LVOTO (peak grad), left ventricle outflow tract obstruction (gradient in mmHg); LV dysf (EF),

systolic dysfunction (ejection fraction); max LVH, left ventricular hypertrophy (maximal ventricular wall thickness in mm); MRI, magnetic resonance imaging; NYHA, New York Heart Association functional class; NCE, no clinical evaluation; NGT, no genetic testing; NSVT, nonsustained ventricular tachycardia; SCD, sudden cardiac death; VT/VF, ventricular tachycardia/ventricular fibrillation; E1, TPM1 p.Arg21Leu. The index case is described in the gray line.

#### **SCD Risk: 9.94**

No pedigree was reported (no pedigree image).

#### **Pedigree #19**

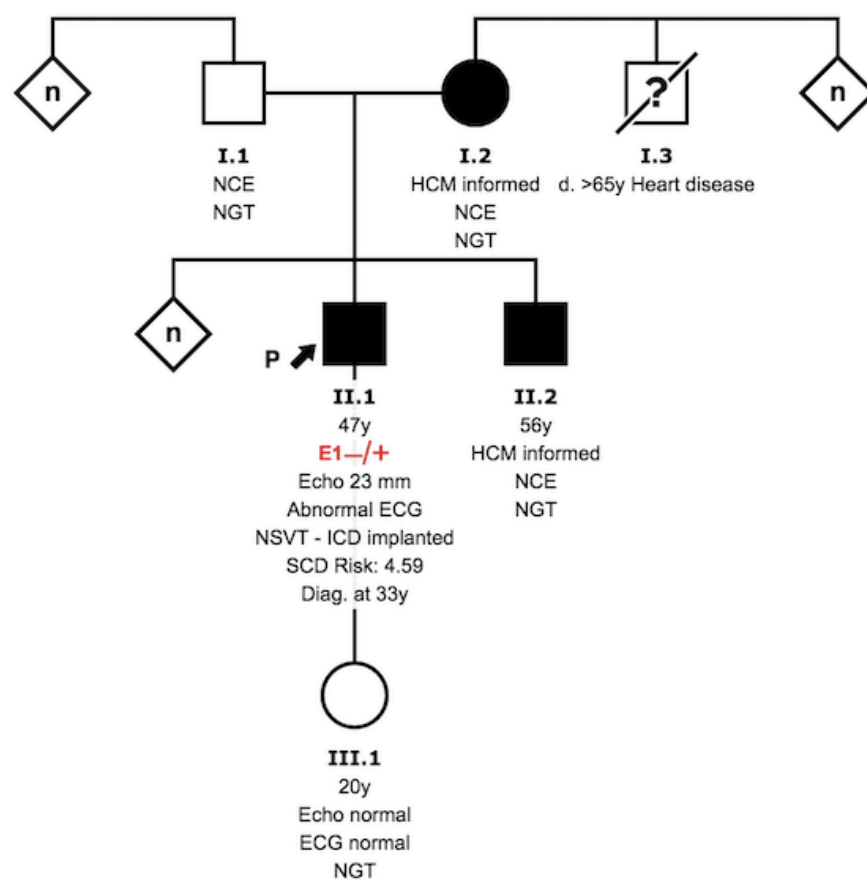

| Id          | Sex | TPM1<br>Arg21Leu | Other<br>mutat | Phenoty<br>pe                        | Age<br>at<br>Dx | Age<br>, y | NY<br>HA | AF | FHSD | Max<br>LVH | TV<br>/<br>FV | Synco<br>pe | Abn<br>BP<br>Resp | LVOTO<br>(Peak<br>grad) | LV<br>Dysf<br>(EF) | Events                             | Additional<br>features                                   | Others                                       |
|-------------|-----|------------------|----------------|--------------------------------------|-----------------|------------|----------|----|------|------------|---------------|-------------|-------------------|-------------------------|--------------------|------------------------------------|----------------------------------------------------------|----------------------------------------------|
| <b>II.1</b> | M   | Yes              | No             | HCM<br>septal                        | 33              | 47         | I        | -  | -    | 23         | +             | No          | No                | -                       | -(>55)             |                                    | <b>ECG:</b> First-<br>degree<br>AVB, high<br>QRS voltage | Primary<br>preventio<br>n – ICD<br>implanted |
| <b>II.2</b> | M   | NGT              |                | HCM<br>reported                      |                 | 56         |          |    |      |            |               |             |                   |                         |                    |                                    |                                                          |                                              |
| <b>I.2</b>  | F   | NGT              |                | HCM<br>reported                      |                 | ?          |          |    |      |            |               |             |                   |                         |                    |                                    |                                                          |                                              |
| <b>I.3</b>  | M   |                  |                | Heart<br>disease<br>not<br>specified |                 | >65        |          |    |      |            |               |             |                   |                         |                    | Heart<br>diseas<br>e<br>death<br>➤ |                                                          |                                              |

Abn BP resp, abnormal blood pressure response on exercise; AF, atrial fibrillation; Dx, diagnosis; DCM, dilated cardiomyopathy; ECG, electrocardiogram; Echo, echocardiogram; FHSD, family history of sudden death; HCM, hypertrophic cardiomyopathy; Id, individual; ICD, implanted cardioverter-defibrillator; LA, left atrium; LGE, late gadolinium enhancement; LVH, left ventricular hypertrophy; LVOTO (peak grad), left ventricle outflow tract obstruction (gradient in mmHg); LV dysf (EF), systolic dysfunction (ejection fraction); max LVH, left ventricular hypertrophy (maximal ventricular wall thickness in mm); MRI, magnetic resonance imaging; NYHA, New York Heart Association functional class; NCE, no clinical evaluation; NGT, no genetic testing; NSVT, nonsustained ventricular tachycardia; SCD, sudden cardiac death; VT/VF, ventricular tachycardia/ventricular fibrillation; E1, TPM1 p.Arg21Leu. The index case is described in the gray line.

Pedigree #20

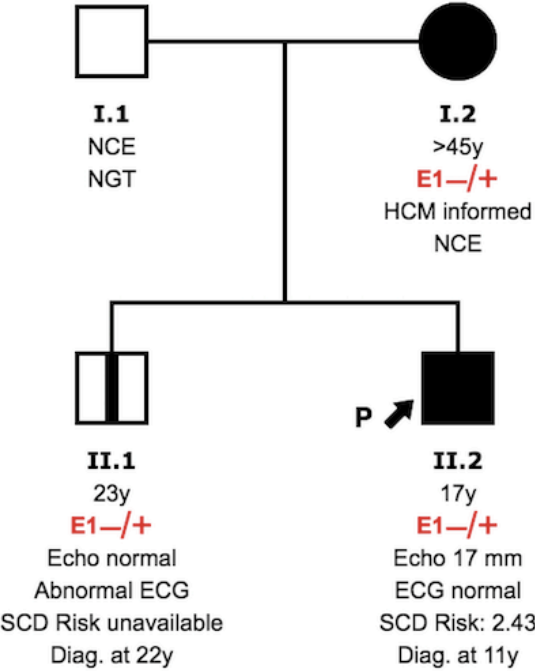

LOD SCORE: 0.17

Revista Española de Cardiología

Lamounier Junior A, et al. Genotype-phenotype correlations in hypertrophic cardiomyopathy:  
a multicenter study in Portugal and Spain of the TPM1 p.Arg21Leu variant

| Id   | Sex | TPM1<br>Arg21Leu | Other<br>mutat | Phenotype       | Age<br>at<br>Dx | Age,<br>y | NY<br>HA | AF | FH<br>SD | Max<br>LVH | TV<br>/<br>FV | Synco<br>pe | Abn<br>BP<br>Resp | LVOTO<br>(Peak<br>grad) | LV<br>Dysf<br>(EF) | Events | Additional<br>features | Others |
|------|-----|------------------|----------------|-----------------|-----------------|-----------|----------|----|----------|------------|---------------|-------------|-------------------|-------------------------|--------------------|--------|------------------------|--------|
| II.2 | M   | Yes              | No             | HCM septal      | 11              | 17        | I        | -  | -        | 17         | -             | No          | No                | -                       | -(77)              |        |                        |        |
| I.2  | F   | Yes              |                | HCM<br>reported | <45             | >45       |          |    |          |            |               |             |                   |                         |                    |        |                        |        |
| II.1 | M   | Yes              |                | HCM             | 22              | 23        | I        | -  | -        | -          | -             | No          | -                 | -                       | -                  |        | ECG: High<br>voltages  |        |

Abn BP resp, abnormal blood pressure response on exercise; AF, atrial fibrillation; Dx, diagnosis; DCM, dilated cardiomyopathy; ECG, electrocardiogram; Echo, echocardiogram; FHSD, family history of sudden death; HCM, hypertrophic cardiomyopathy; Id, individual; ICD, implanted cardiofibrillator; LA, left atrium; LGE, late gadolinium enhancement; LVH, left ventricular hypertrophy; LVOTO (peak grad), left ventricle outflow tract obstruction (gradient in mmHg); LV dysf (EF),

systolic dysfunction (ejection fraction); max LVH, left ventricular hypertrophy (maximal ventricular wall thickness in mm); MRI, magnetic resonance imaging; NYHA, New York Heart Association functional class; NCE, no clinical evaluation; NGT, no genetic testing; NSVT, nonsustained ventricular tachycardia; SCD, sudden cardiac death; VT/VF, ventricular tachycardia/ventricular fibrillation; E1, TPM1 p.Arg21Leu. The index case is described in the gray line.

## **Pedigree #21**

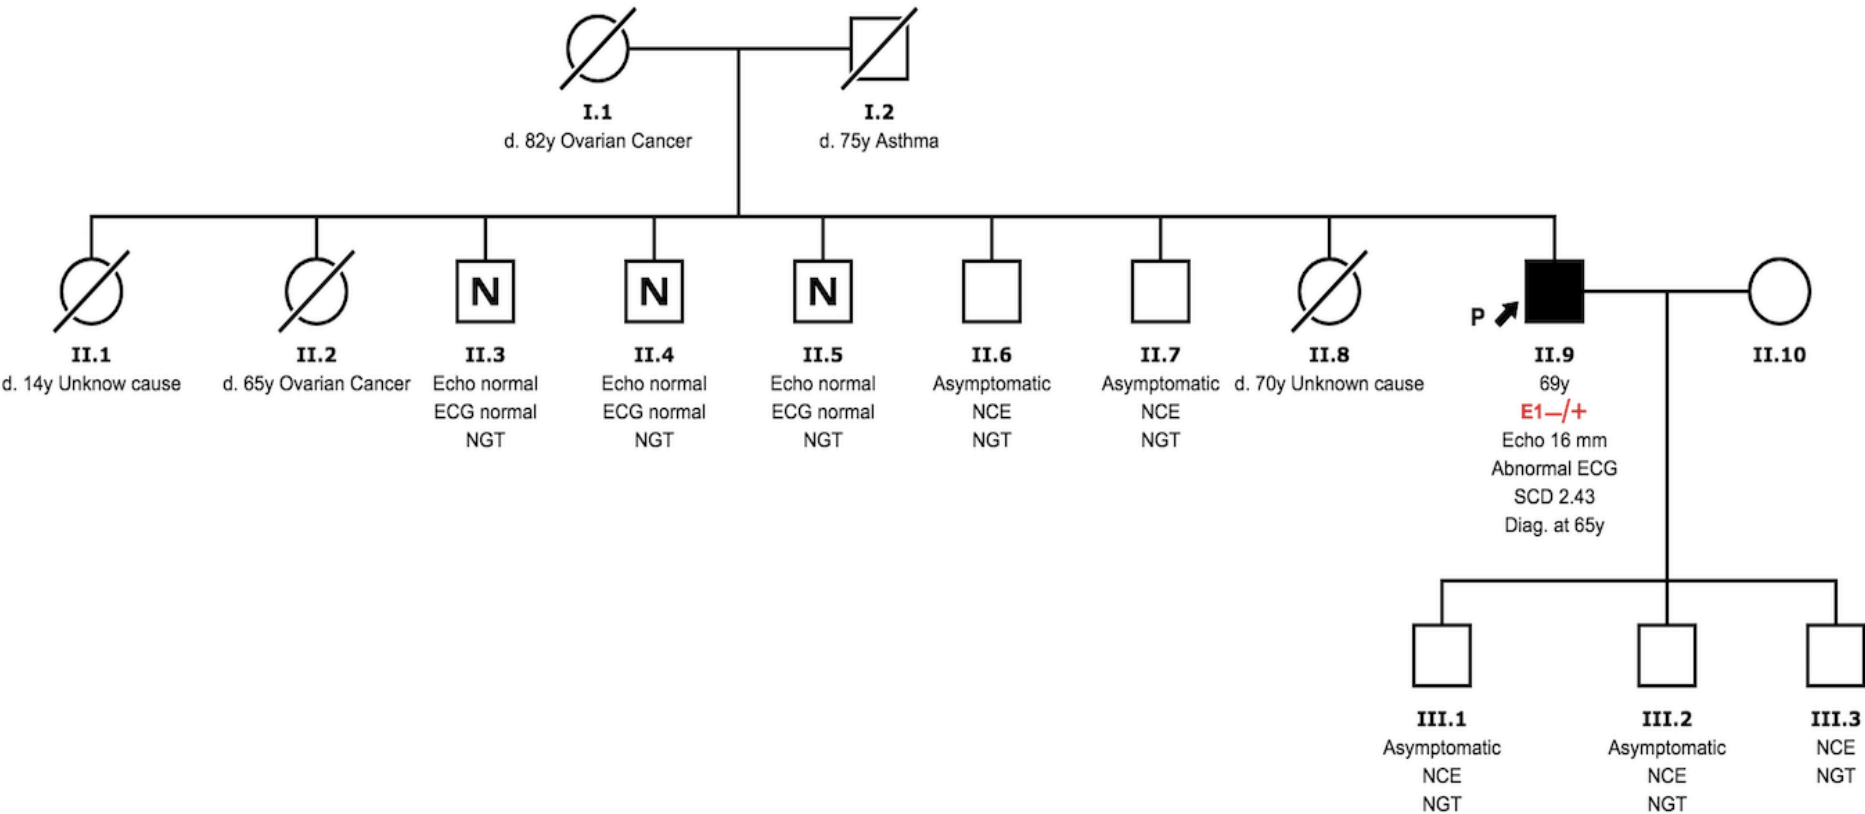



| Id   | Sex | TPM1<br>Arg21Leu | Other<br>mutat | Phenotype  | Age<br>at Dx | Age<br>, y | NYH<br>A | AF | F<br>H<br>SD | Max<br>LVH | TV/<br>FV | Sync<br>ope | Abn<br>BP<br>Resp | LVOTO<br>(Peak<br>grad) | LV Dysf<br>(EF) | Events | Additional<br>features                                                                                                       | Others |
|------|-----|------------------|----------------|------------|--------------|------------|----------|----|--------------|------------|-----------|-------------|-------------------|-------------------------|-----------------|--------|------------------------------------------------------------------------------------------------------------------------------|--------|
| II.9 | M   | Yes              | No             | HCM septal | 65           | 69         | I        | -  | -            | 16         | -         | No          | No                | -                       | -(72)           |        | <b>Echo:</b> LA dilatation, diastolic dysfunction I.<br><b>ECG:</b> High QRS voltages, pathologic Q waves, negative T waves. |        |

Abn BP resp, abnormal blood pressure response on exercise; AF, atrial fibrillation; Dx, diagnosis; DCM, dilated cardiomyopathy; ECG, electrocardiogram; Echo, echocardiogram; FHSD, family history of sudden death; HCM, hypertrophic cardiomyopathy; Id, individual; LA, left atrium; LGE, late gadolinium enhancement; LVH, left ventricular hypertrophy; LVOTO (peak grad), left ventricle outflow tract obstruction (gradient in mmHg); LV dysf (EF), systolic dysfunction (ejection fraction); max LVH, left ventricular hypertrophy (maximal ventricular wall thickness in mm); MRI, magnetic resonance imaging; NYHA, New York Heart Association functional class; NCE, no clinical evaluation; NGT, no genetic testing; NSVT, nonsustained ventricular tachycardia; SCD, sudden cardiac death; VT/VF, ventricular tachycardia/ventricular fibrillation; E1, TPM1 p.Arg21Leu. The index case is described in the gray line.

**Pedigree #22**

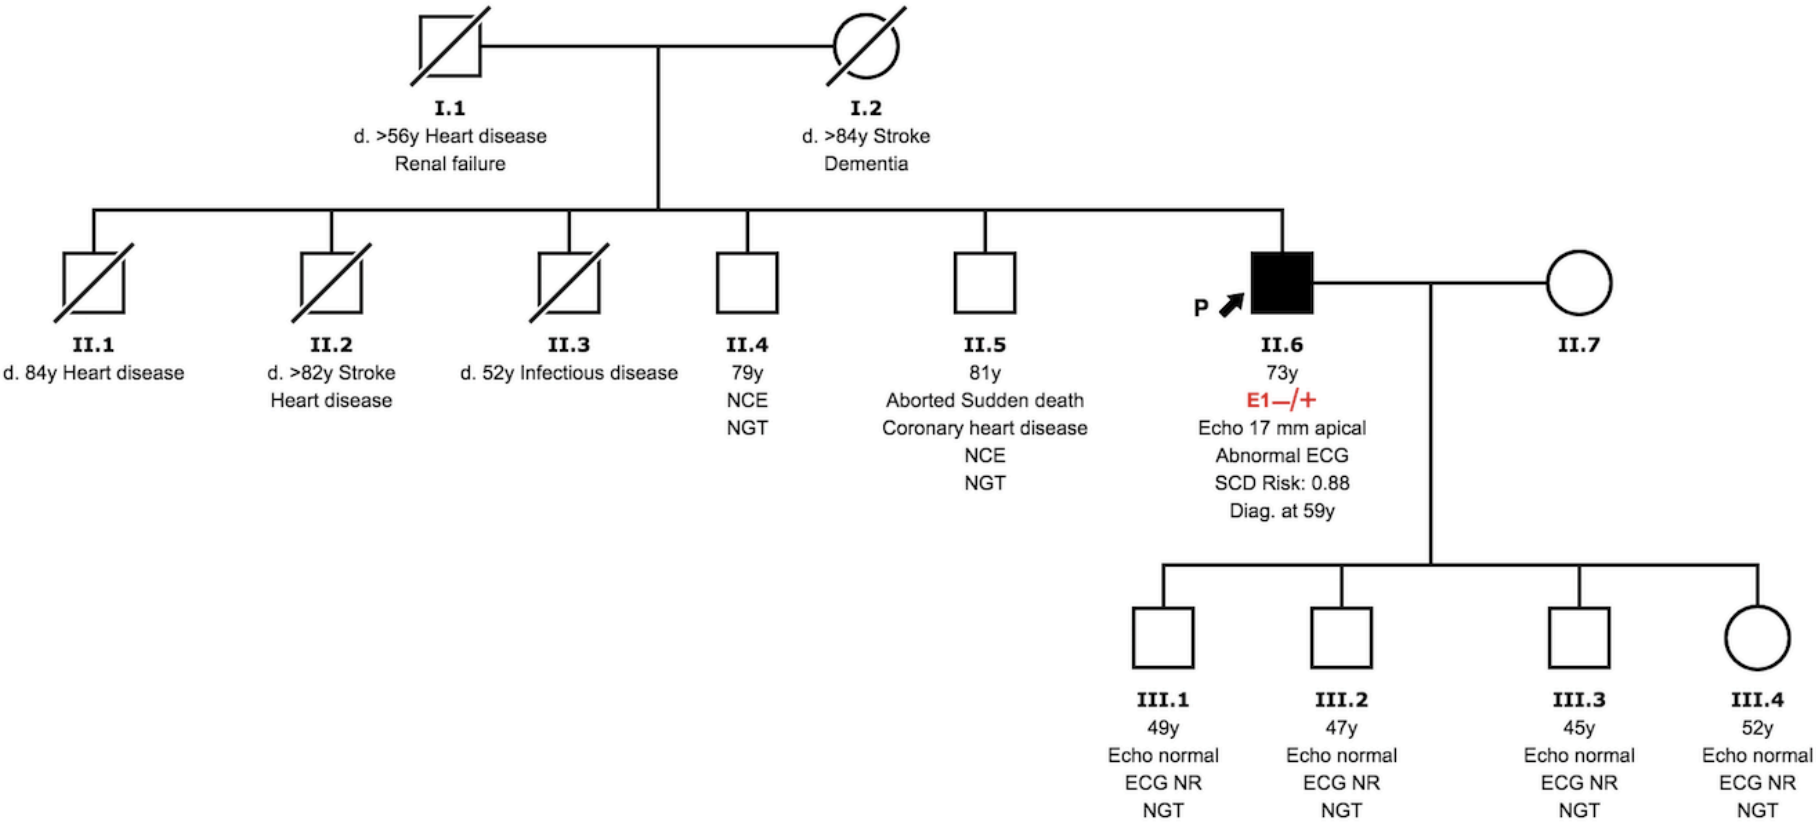

| Id  | Sex | TPM1<br>Arg21Leu | Other<br>mutat | Phenotype  | Age<br>at Dx | Age<br>, y | NY<br>HA | AF | FH<br>SD | Max<br>LVH | TV<br>/<br>FV | Syncop<br>e | Abn<br>BP<br>Resp | LVOT<br>O<br>(Peak<br>grad) | LV<br>Dysf<br>(EF) | Events                      | Additional features                                                                                                                                                   | Others |
|-----|-----|------------------|----------------|------------|--------------|------------|----------|----|----------|------------|---------------|-------------|-------------------|-----------------------------|--------------------|-----------------------------|-----------------------------------------------------------------------------------------------------------------------------------------------------------------------|--------|
| II6 | F   | Yes              | No             | HCM apical | 59           | 73         | I        | -  | -        | 17         | -             | -           | -                 | -                           | -(77)              |                             | <b>MRI:</b> No late gadolinium enhancement<br><b>ECG:</b> QRS high voltages, negative T waves V <sub>2</sub> -V <sub>6</sub> , DI-II<br><b>Holter:</b> VEBs >200/24 h |        |
| I.1 | M   |                  |                |            | 56           |            |          |    |          |            |               |             |                   |                             |                    | Heart disease death at 56 y |                                                                                                                                                                       |        |

Abn BP resp, abnormal blood pressure response on exercise; AF, atrial fibrillation; Dx, diagnosis; DCM, dilated cardiomyopathy; ECG, electrocardiogram; Echo, echocardiogram; FHSD, family history of sudden death; HCM, hypertrophic cardiomyopathy; Id, individual; LA, left atrium; LGE, late gadolinium enhancement; LVH, left ventricular hypertrophy; LVOTO (peak grad), left ventricle outflow tract obstruction (gradient in mmHg); LV dysf (EF), systolic dysfunction (ejection fraction); Max LVH, left ventricular hypertrophy (maximal ventricular wall thickness in mm); MRI, magnetic resonance imaging; NYHA, New York Heart Association functional class; NCE, no clinical evaluation; NGT, no genetic testing; NSVT, nonsustained ventricular tachycardia; SCD, sudden cardiac death; VEB, Ventricular ectopic beats; VT/VF, ventricular tachycardia/ventricular fibrillation; E1, TPM1 p.Arg21Leu. The index case is described in the gray line.

**Pedigree #23**

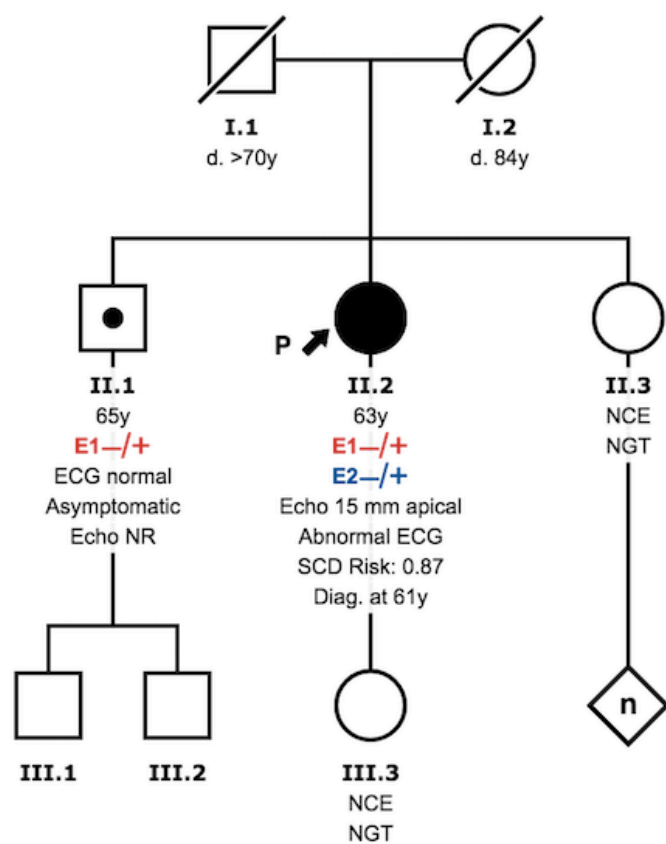

| Id  | Sex | TPM1<br>Arg21Leu | Other<br>mutat             | Phenotype  | Age<br>at<br>Dx | Age<br>, y | NYH<br>A | AF | F<br>H<br>SD | Max<br>LVH | TV<br>/<br>FV | Syncop<br>e | Abn<br>BP<br>Resp | LVOTO<br>(Peak<br>grad) | LV<br>Dysf<br>(EF) | Events | Additional<br>features                                                            | Others |
|-----|-----|------------------|----------------------------|------------|-----------------|------------|----------|----|--------------|------------|---------------|-------------|-------------------|-------------------------|--------------------|--------|-----------------------------------------------------------------------------------|--------|
| II2 | F   | Yes              | MYH7<br>Leu1333<br>Val (?) | HCM apical | 61              | 63         | I        | -  | -            | 15         | -             | -           | -                 | -                       | -(58)              |        | ECG: High<br>voltages, LVH<br>and right<br>ventricle<br>hypertrophy,<br>short PR? |        |

Abn BP resp, abnormal blood pressure response on exercise; AF, atrial fibrillation; Dx, diagnosis; DCM, dilated cardiomyopathy; ECG, electrocardiogram; Echo, echocardiogram; FHSD, family history of sudden death; HCM, hypertrophic cardiomyopathy; Id, individual; LA, left atrium; LGE, late gadolinium enhancement; LVH, left ventricular hypertrophy; LVOTO (peak grad), left ventricle outflow tract obstruction (gradient in mmHg); LV dysf (EF), systolic dysfunction (ejection fraction); Max LVH, left ventricular hypertrophy (maximal ventricular wall thickness in mm); MRI, magnetic resonance imaging; NYHA, New York Heart Association functional class; NCE, no clinical evaluation; NGT, no genetic testing; NSVT, nonsustained ventricular tachycardia; SCD, sudden cardiac death; VT/VF, ventricular tachycardia/ventricular fibrillation; E1, TPM1 p.Arg21Leu; E2, other variant (see table). The index case is described in the gray line.

### Comments:

**1. Complex genotype:** Patient II.2, with a mild phenotype, carried an additional *MYH7* variant of uncertain significance.

We consider **MYH7 p.Leu1333Val** is a variant of unknown clinical significance (?). This is the third HCM index case we have identified with the variant, and we have identified it in another index with DCM phenotype. It has been reported in 4 heterozygous individuals from the gnomAD database. These data could suggest late/incomplete penetrance for the variant, but its pathogenicity is still uncertain.

**Pedigree #24**



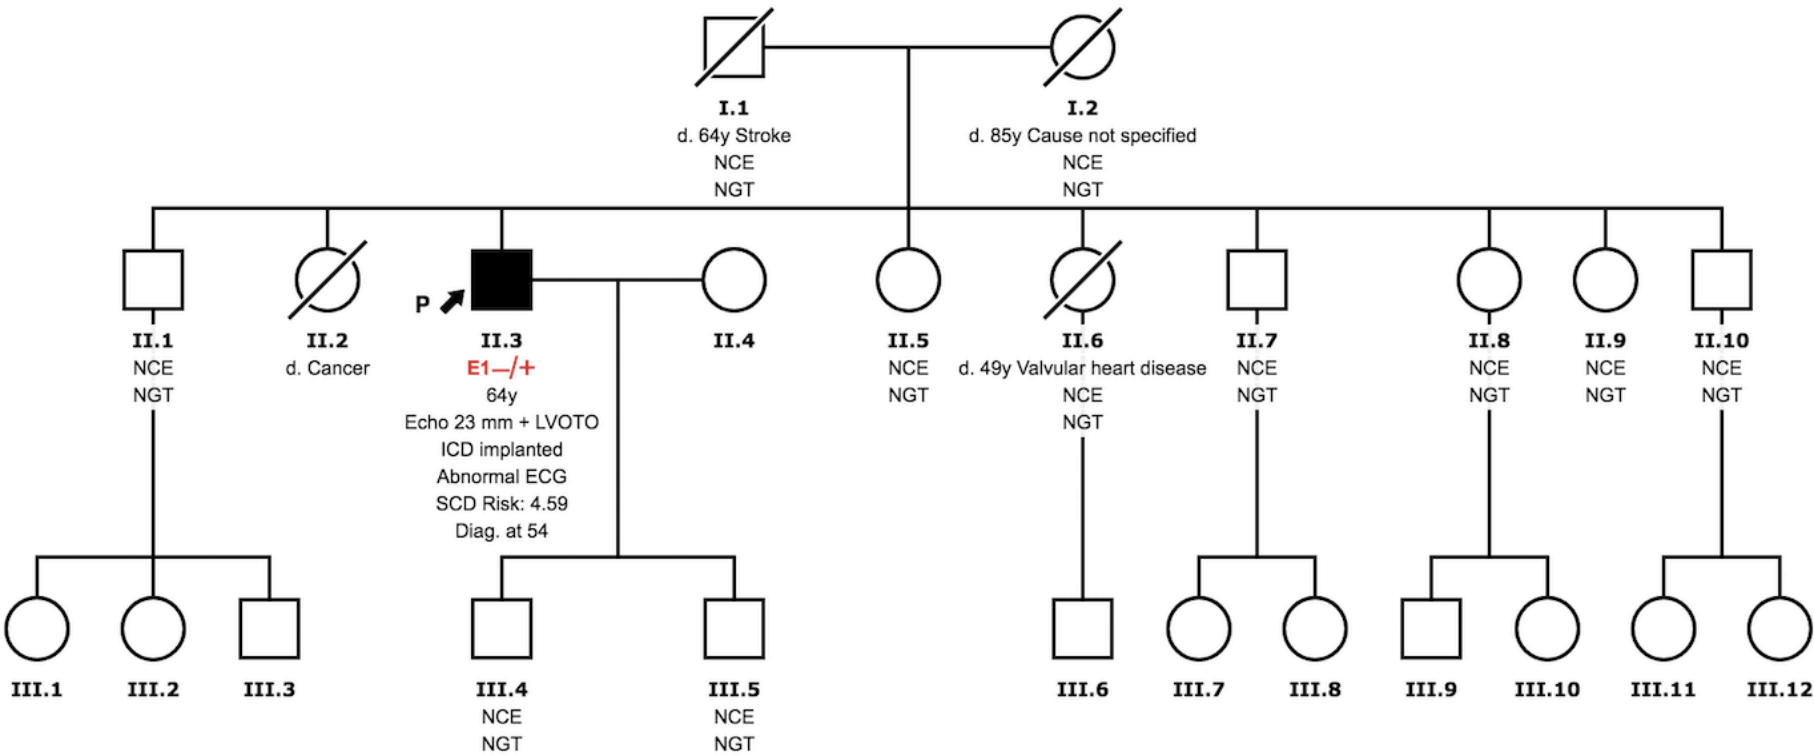

| Id   | Sex | TPM1<br>Arg21Leu | Other<br>mutat | Phenoty<br>pe    | Age<br>at<br>Dx | Age<br>, y | NYH<br>A | AF | FH<br>SD | Max<br>LVH | TV/<br>FV | Synco<br>pe | Abn<br>BP<br>Resp | LVOT<br>O<br>(Peak<br>grad) | LV<br>Dysf<br>(EF) | Events                                            | Additional<br>features | Others                             |
|------|-----|------------------|----------------|------------------|-----------------|------------|----------|----|----------|------------|-----------|-------------|-------------------|-----------------------------|--------------------|---------------------------------------------------|------------------------|------------------------------------|
| II.3 | M   | Yes              | No             | HCM<br>septal    | 54              | 64         | I        | -  | -        | 23         | -         | +           | +                 | +(88)                       | -(60)              |                                                   |                        | SAH severe<br><br>ICD<br>implanted |
| I.1  | M   | NGT              |                | NCE              |                 | 64         |          |    |          |            |           |             |                   |                             |                    | Stroke-<br>related<br>death at 64<br>y            |                        |                                    |
| II.6 | F   | NGT              |                | Heart<br>disease |                 | 49         |          |    |          |            |           |             |                   |                             |                    | Valvular<br>heart<br>disease—<br>death at 49<br>y |                        |                                    |

Abn BP resp, abnormal blood pressure response on exercise; AF, atrial fibrillation; Dx, diagnosis; DCM, dilated cardiomyopathy; ECG, electrocardiogram; Echo, echocardiogram; FHSD, family history of sudden death; HCM, hypertrophic cardiomyopathy; Id, individual; ICD, implanted cardioresuscitator; LA, left atrium; LGE, late gadolinium enhancement; LVH, left ventricular hypertrophy; LVOTO (peak grad), left ventricle outflow tract obstruction (gradient in mmHg); LV dysf (EF), systolic dysfunction (ejection fraction); max LVH, left ventricular hypertrophy (maximal ventricular wall thickness in mm); MRI, magnetic resonance imaging; NYHA, New York Heart Association functional class; NCE, no clinical evaluation; NGT, no genetic testing; NSVT, nonsustained ventricular tachycardia; SCD, sudden cardiac death; VT/VF, ventricular tachycardia/ventricular fibrillation; E1, TPM1 p.Arg21Leu. The index case is described in the gray line.

**Pedigree #25**

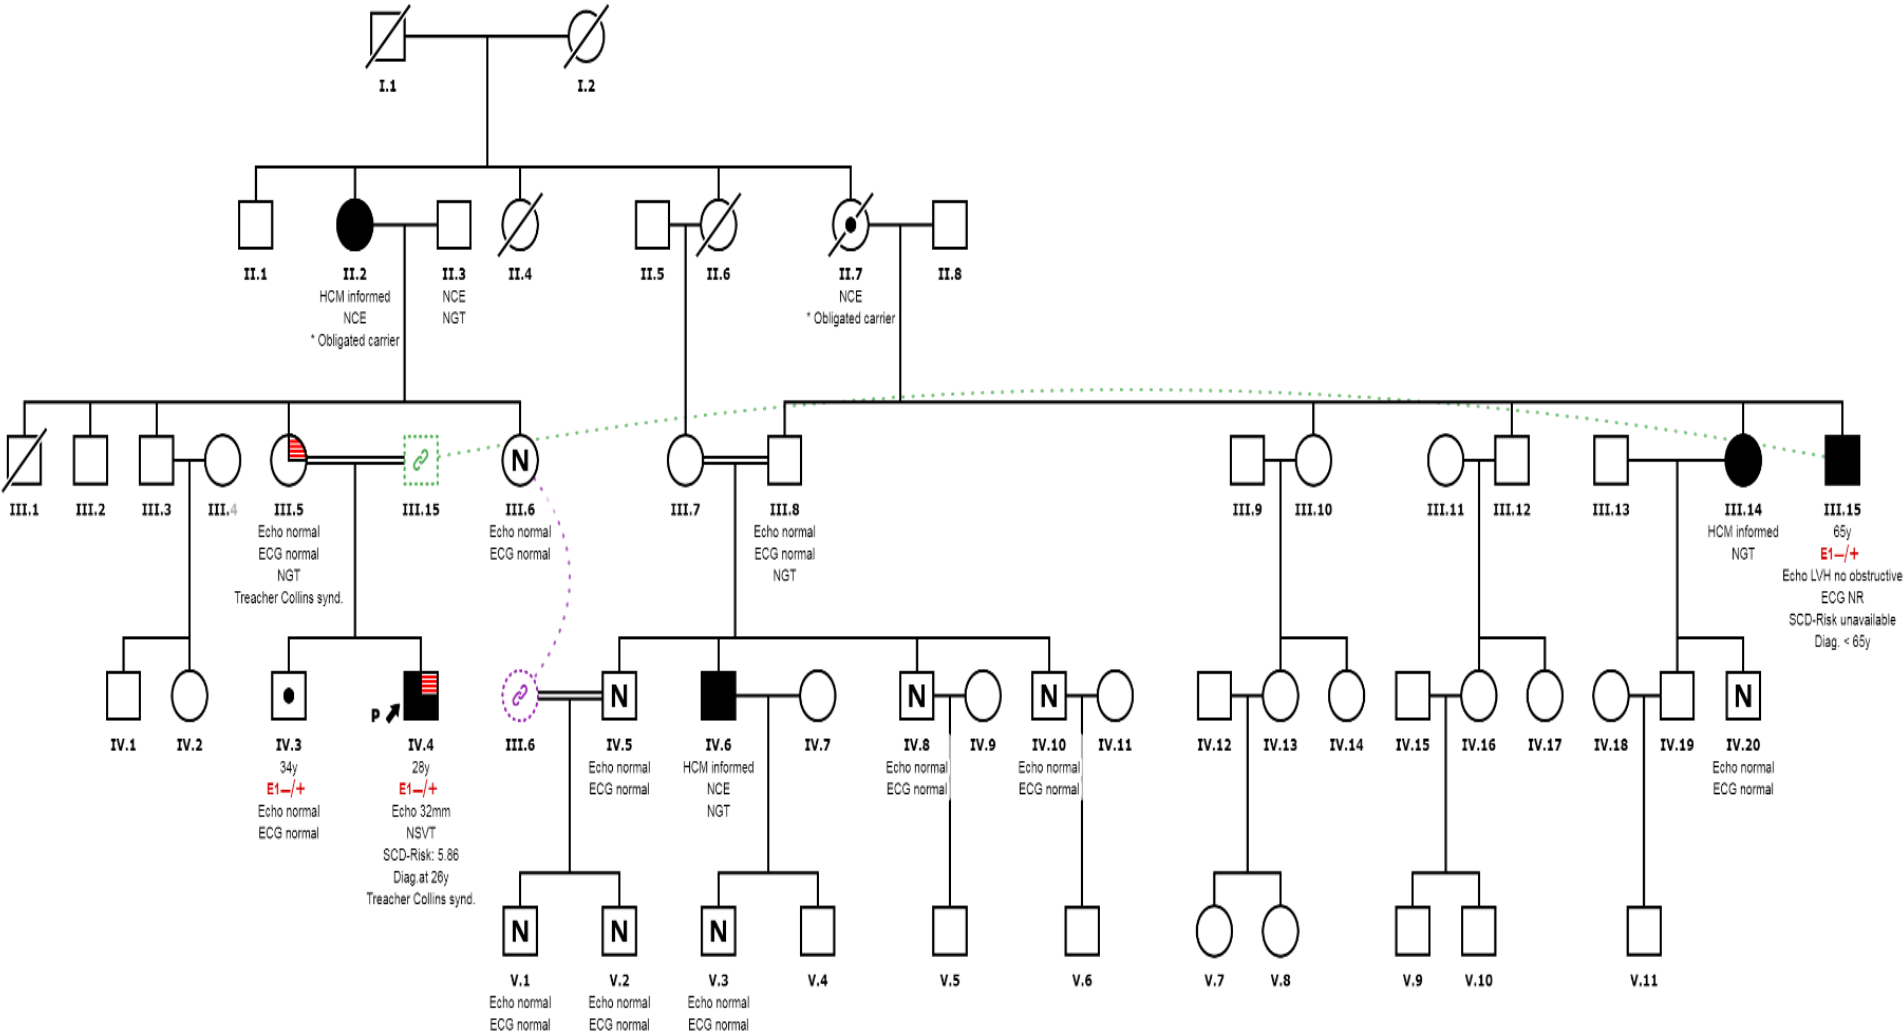

[illegible]

Abn BP resp, abnormal blood pressure response on exercise; AF, atrial fibrillation; Dx, diagnosis; DCM, dilated cardiomyopathy; ECG, electrocardiogram; Echo, echocardiogram; FHSD, family history of sudden death; HCM, hypertrophic cardiomyopathy; Id, individual; ICD, implanted cardioverter-defibrillator; LA, left atrium; LGE, late gadolinium enhancement; LVH, left ventricular hypertrophy; LVOTO (peak grad), left ventricle outflow tract obstruction (gradient in mmHg); LV dysf (EF), systolic dysfunction (ejection fraction); max LVH, left ventricular hypertrophy (maximal ventricular wall thickness in mm); MRI, magnetic resonance imaging; NYHA, New York Heart Association functional class; NCE, no clinical evaluation; NGT, no genetic testing; NSVT, nonsustained ventricular tachycardia; SCD, sudden cardiac death; VT/VF, ventricular tachycardia/ventricular fibrillation; E1, TPM1 p.Arg21Leu. The index case is described in the gray line.

#### **Comments pedigree #26:**

This pedigree has a carrier (II.3) with severe phenotype diagnosed at a young age, who also had a diagnosis of Treacher-Collins syndrome. Cardiac involvement has not been reported among the clinical features of this syndrome. His older brother is a clinically unaffected *TPM1* p.Arg21Leu carrier.

**Pedigree #26**

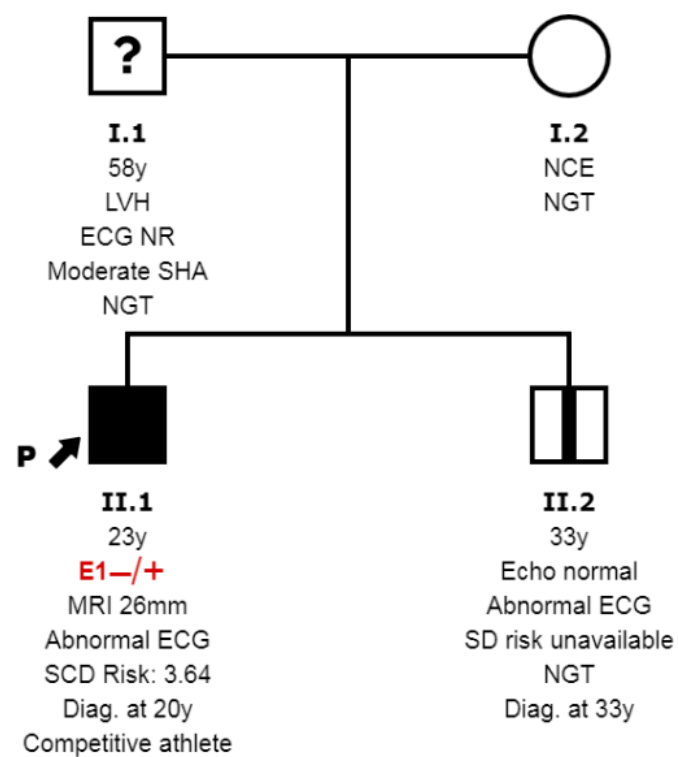



| Id   | Sex | TPM1<br>Arg21Leu | Other<br>mutat | Phenotype              | Age<br>at<br>Dx | Age,<br>y | NYHA | AF | FHSD | Max<br>LVH | TV/FV | Syncope | Abn<br>BP<br>Resp | LVOTO<br>(Peak<br>grad) | LV<br>Dysf<br>(EF) | Events | Additional<br>features                                                                           | Others                                                  |
|------|-----|------------------|----------------|------------------------|-----------------|-----------|------|----|------|------------|-------|---------|-------------------|-------------------------|--------------------|--------|--------------------------------------------------------------------------------------------------|---------------------------------------------------------|
| II.1 | M   | Yes              | No             | HCM<br>septal          | 20              | 23        | I    | -  | -    | 26         | -     | -       | -                 | -                       | -                  |        | ECG: High<br>voltages,<br>abnormal<br>repolarization.<br><br>MRI: LGE 2<br>segments, LA<br>41 mm | Football<br>practice<br>from the<br>age of 9 to<br>22 y |
| II.2 | M   | NGT              |                | Not<br>affected<br>(?) |                 | 33        | I    | -  | -    | -          | -     | -       | -                 | -                       | -                  |        | ECG: High<br>voltages,<br>abnormal<br>repolarization                                             |                                                         |
| I.1  | M   | NGT              |                | ?                      |                 | 58        | I    | -  | -    | +          | -     | -       | -                 | -                       | -                  |        |                                                                                                  | Moderate<br>SAH                                         |

Abn BP resp, abnormal blood pressure response on exercise; AF, atrial fibrillation; Dx, diagnosis; DCM, dilated cardiomyopathy; ECG, electrocardiogram; Echo, echocardiogram; FHSD, family history of sudden death; HCM, hypertrophic cardiomyopathy; Id, individual; ICD, implanted cardioverter-defibrillator; LA, left atrium; LGE, late gadolinium enhancement; LVH, left ventricular hypertrophy; LVOTO (peak grad), left ventricle outflow tract obstruction (gradient in mmHg); LV dysf (EF), systolic dysfunction (ejection fraction); max LVH, left ventricular hypertrophy (maximal ventricular wall thickness in mm); MRI, magnetic resonance imaging; NYHA, New York Heart Association functional class; NCE, no clinical evaluation; NGT, no genetic testing; NSVT, nonsustained ventricular tachycardia; SAH, Systemic arterial hypertension; SCD, sudden cardiac death; VT/VF, ventricular tachycardia/ventricular fibrillation; E1, TPM1 p.Arg21Leu. The index case is described in the gray line.

Pedigree #27

| Id | Sex | TPM1<br>Arg21Leu | Other<br>mutat | Phenotype  | Age<br>at<br>Dx | Age<br>, y | NYHA | AF | F<br>H<br>S<br>D | Max<br>LVH | TV<br>/<br>FV | Synco<br>pe | Abn<br>BP<br>Resp | LVOTO<br>(Peak<br>grad) | LV<br>Dysf<br>(EF) | Events | Additional<br>features                                                             | Others   |
|----|-----|------------------|----------------|------------|-----------------|------------|------|----|------------------|------------|---------------|-------------|-------------------|-------------------------|--------------------|--------|------------------------------------------------------------------------------------|----------|
|    | F   | Yes              | No             | HCM septal | 60              | 69         | II   | -  | -                | 21         | -             | -           | -                 | -                       | -                  |        | ECG: High voltages.<br>MRI: LGE anteroseptal, anterior mid-basal segment. LA 48 mm | mild SAH |

Abn BP resp, abnormal blood pressure response on exercise; AF, atrial fibrillation; Dx, diagnosis; DCM, dilated cardiomyopathy; ECG, electrocardiogram; Echo, echocardiogram; FHSD, family history of sudden death; HCM, hypertrophic cardiomyopathy; Id, individual; ICD, implanted cardiofibrillator; LA, left atrium; LGE, late gadolinium enhancement; LVH, left ventricular hypertrophy; LVOTO (peak grad), left ventricle outflow tract obstruction (gradient in mmHg); LV dysf (EF), systolic dysfunction (ejection fraction); max LVH, left ventricular hypertrophy (maximal ventricular wall thickness in mm); MRI, magnetic resonance imaging; NYHA, New York Heart Association functional class; NCE, no clinical evaluation; NGT, no genetic testing; NSVT, nonsustained ventricular tachycardia; SAH, Systemic arterial hypertension; SCD, sudden cardiac death; VT/VF, ventricular tachycardia/ventricular fibrillation; E1, TPM1 p.Arg21Leu. The index case is described in the gray line.

SCD risk: 1.73

No pedigree was reported (no pedigree image).

Pedigree #28

| Id | Sex | TPM1<br>Arg21Leu | Other<br>mutat            | Phenotype     | Age<br>at<br>Dx | Age<br>, y | NYH<br>A | AF | F<br>H<br>SD | Max<br>LVH | TV<br>/<br>FV | Syncop<br>e | Abn<br>BP<br>Resp | LVOTO<br>(Peak<br>grad) | LV<br>Dysf<br>(EF) | Events | Additional<br>features                                                                                                                 | Others |
|----|-----|------------------|---------------------------|---------------|-----------------|------------|----------|----|--------------|------------|---------------|-------------|-------------------|-------------------------|--------------------|--------|----------------------------------------------------------------------------------------------------------------------------------------|--------|
|    | M   | Yes              | MYH7<br>Tyr582C<br>ys (?) | HCM<br>septal | 56              | 57         | II-III   | -  | -            | 17         | -             | -           | -                 | + (110)                 | -(61)              |        | <b>ECG:</b> High<br>voltages.<br><b>MRI:</b> No<br>fibrosis, LA 45<br>mm, mild-<br>moderate<br>degenerative<br>mitral<br>regurgitation |        |

Abn BP resp, abnormal blood pressure response on exercise; AF, atrial fibrillation; Dx, diagnosis; DCM, dilated cardiomyopathy; ECG, electrocardiogram; Echo, echocardiogram; FHSD, family history of sudden death; HCM, hypertrophic cardiomyopathy; Id, individual; ICD, implanted cardiofibrillator; LA, left atrium; LGE, late gadolinium enhancement; LVH, left ventricular hypertrophy; LVOTO (peak grad), left ventricle outflow tract obstruction (gradient in mmHg); LV dysf (EF), systolic dysfunction (ejection fraction); max LVH, left ventricular hypertrophy (maximal ventricular wall thickness in mm); MRI, magnetic resonance imaging; NYHA, New York Heart Association functional class; NCE, no clinical evaluation; NGT, no genetic testing; NSVT, nonsustained ventricular tachycardia; SCD, sudden cardiac death; VT/VF, ventricular tachycardia/ventricular fibrillation; E1, TPM1 p.Arg21Leu. The index case is described in the gray line.

**SCD risk: 2.39**

No pedigree was reported (no pedigree image).

**Comments:**

- 1. Complex genotype:** Carrier of an additional variant of uncertain significance in MYH7 with mild phenotype and low SCD risk. No myocardial fibrosis in MRI.

We consider **MYH7 p.Tyr582Cys** to be a variant of unknown clinical significance (?). To date, it has been identified only in this single patient. The variant is absent in control populations. It is located within a protein domain in which many other variants have been associated with HCM.

**Pedigree #29**

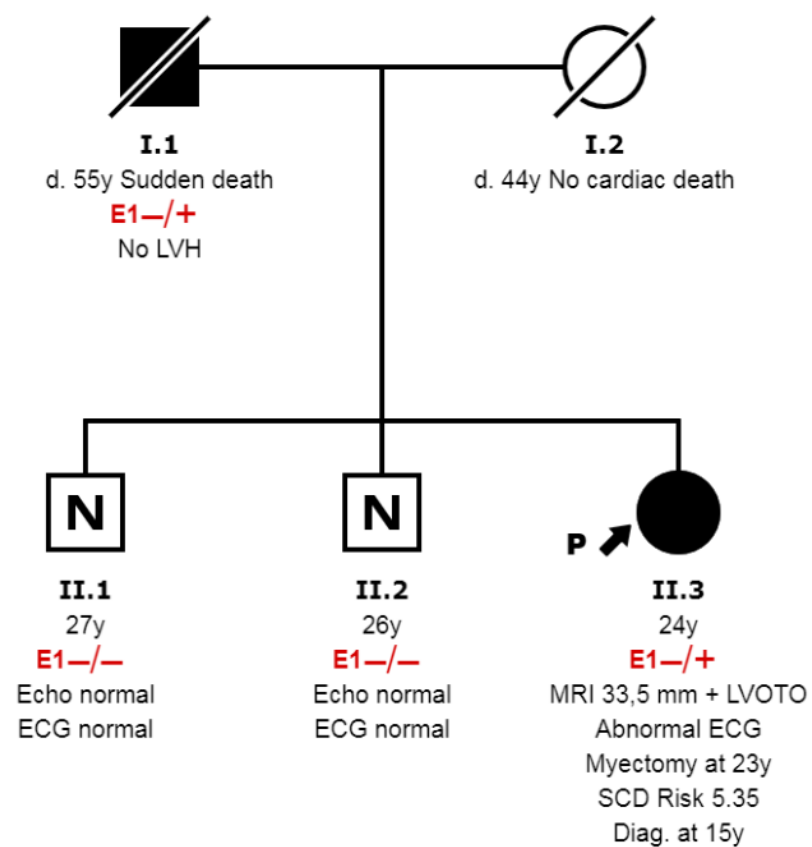

**LOD SCORE: 0.23**

| Id   | Sex | TPM1<br>Arg21Leu | Other<br>mutat | Phenotype       | Age<br>at<br>Dx | Age<br>, y | NYH<br>A | AF | FH<br>SD | Max<br>LVH | TV<br>/<br>FV | Syncop<br>e | Abn<br>Vasc<br>Resp | LVOT<br>O<br>(Peak<br>grad) | LV<br>Dysf<br>(EF) | Events                    | Additional<br>features                                             | Others                                                                                            |
|------|-----|------------------|----------------|-----------------|-----------------|------------|----------|----|----------|------------|---------------|-------------|---------------------|-----------------------------|--------------------|---------------------------|--------------------------------------------------------------------|---------------------------------------------------------------------------------------------------|
| II.3 | F   | Yes              | No             | HCM septal      | 15              | 24         | II       | -  | +        | 33.5       | -             | -           | -                   | +                           | (90)               | -(72)                     | ECG: Q<br>waves<br><br>MRI: LGE<br>in all<br>segments,<br>LA 32 mm | Myectomy at<br>23y                                                                                |
| I.1  | M   | Yes              | No             | Sudden<br>Death |                 | 55         |          |    |          | No         |               |             |                     |                             |                    | Sudden<br>death<br>at 55y |                                                                    | Autopsy.<br>reported<br>without LVH.<br>Investigated<br>with NGS<br>panel in<br>another<br>center |

Abn BP resp, abnormal blood pressure response on exercise; AF, atrial fibrillation; Dx, diagnosis; DCM, dilated cardiomyopathy; ECG, electrocardiogram; Echo, echocardiogram; FHSD, family history of sudden death; HCM, hypertrophic cardiomyopathy; Id, individual; ICD, implanted cardioverter-defibrillator; LA, left atrium; LGE, late gadolinium enhancement; LVH, left ventricular hypertrophy; LVOTO (peak grad), left ventricle outflow tract obstruction (gradient in mmHg); LV dysf (EF), systolic dysfunction (ejection fraction); max LVH, left ventricular hypertrophy (maximal ventricular wall thickness in mm); MRI, magnetic resonance imaging; NYHA, New York Heart Association functional class; NCE, no clinical evaluation; NGT, no genetic testing; NSVT, nonsustained ventricular tachycardia; SCD, sudden cardiac death; VT/VF, ventricular tachycardia/ventricular fibrillation; E1, TPM1 p.Arg21Leu. The index case is described in the gray line.

**Pedigree #30**

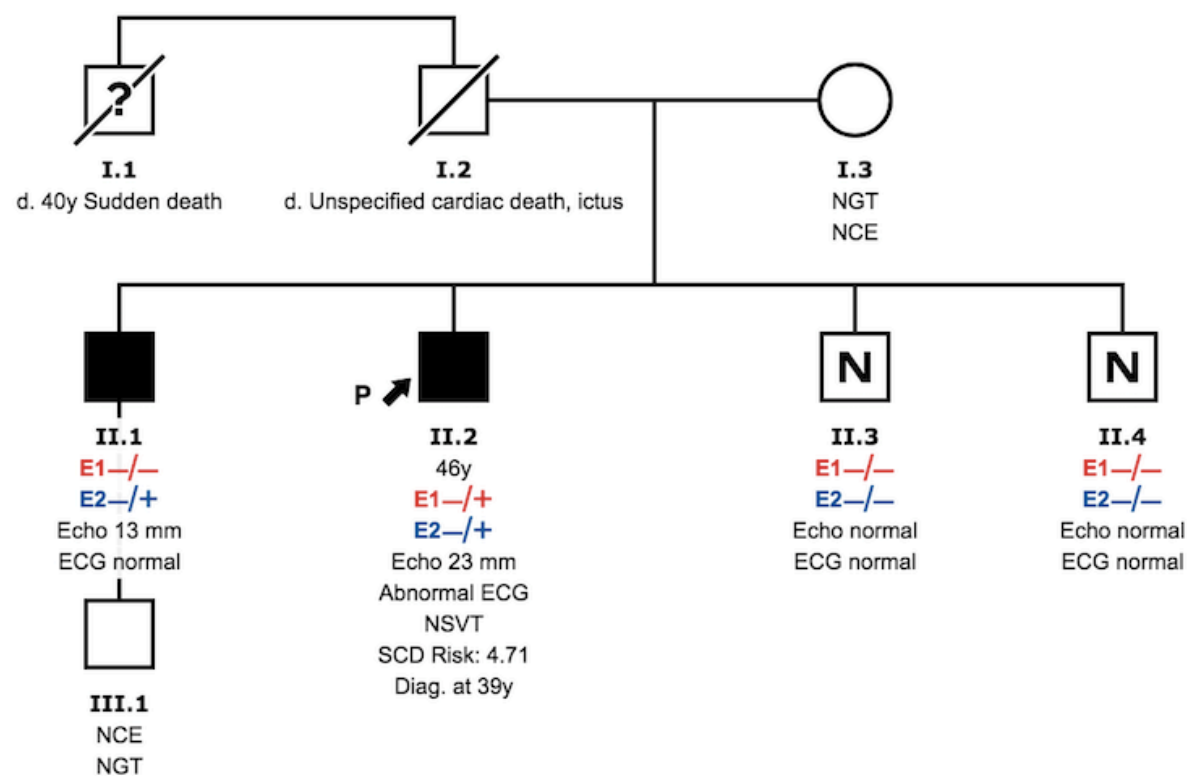



| Id   | Sex | TPM1<br>Arg21Leu | Other<br>mutat              | Phenotyp<br>e | Age<br>at<br>Dx | Age<br>, y | NYHA | AF | F<br>H<br>S<br>D | Max<br>LVH | TV<br>/<br>FV | Syncop<br>e | Abn<br>Vasc<br>Resp | LVOTO<br>(Peak<br>grad) | LV<br>Dysf<br>(EF) | Events                     | Additional<br>features                                            | Others |
|------|-----|------------------|-----------------------------|---------------|-----------------|------------|------|----|------------------|------------|---------------|-------------|---------------------|-------------------------|--------------------|----------------------------|-------------------------------------------------------------------|--------|
| II.2 | M   | Yes              | TPM1<br>Met281<br>Val (+++) | HCM<br>septal | 39              | 46         | I    | -  | +                | 23         | +             | -           | -                   | - (20)                  | - (77)             |                            | <b>MRI:</b> LGE > 3<br>segments<br><b>Holter:</b> NSVT<br>3 beats |        |
| I.1  | M   | ?                | ?                           |               |                 | 40         |      |    |                  |            |               |             |                     |                         |                    | Sudden<br>death<br>at 40 y |                                                                   |        |

Abn BP resp, abnormal blood pressure response on exercise; AF, atrial fibrillation; Dx, diagnosis; DCM, dilated cardiomyopathy; ECG, electrocardiogram; Echo, echocardiogram; FHSD, family history of sudden death; HCM, hypertrophic cardiomyopathy; Id, individual; ICD, implanted cardioverter-defibrillator; LA, left atrium; LGE, late gadolinium enhancement; LVH, left ventricular hypertrophy; LVOTO (peak grad), left ventricle outflow tract obstruction (gradient in mmHg); LV dysf (EF), systolic dysfunction (ejection fraction); max LVH, left ventricular hypertrophy (maximal ventricular wall thickness in mm); MRI, magnetic resonance imaging; NYHA, New York Heart Association functional class; NCE, no clinical evaluation; NGT, no genetic testing; NSVT, nonsustained ventricular tachycardia; SAH, systemic arterial hypertension; SCD, sudden cardiac death; VT/VF, ventricular tachycardia/ventricular fibrillation; E1, TPM1 p.Arg21Leu; E2, other variant (see table). The index case is described in the gray line.

### Comments pedigree #30:

**1. Complex genotype:** Two pathogenic variants in TPM1 were identified in this family. Only individual II.2 carried both variants. Compared to his brother (II.1), who carried only the TPM1 p.Met281Val, the clinical expression of the index case was more severe and could suggest a synergic effect of the 2 variants. The paternal uncle (I.1) had a sudden death at 40 years of age; we cannot determine if he had only 1 of the family's variants or both.

We consider **TPM1 p.Met281Val** to be a rare pathogenic variant (8 individuals in gnomAD). This variant has been identified in at least 25 HCM-pedigrees (30 affected carriers and 8 unaffected relatives). Familial cosegregation has been documented in at least 1 large family. Clinical data of the carriers suggest late/incomplete penetrance (only 5 carriers were diagnosed under the age of 45 years). Another rare variant affecting the same amino acid (p.Met281Thr) has been identified in 5 HCM patients (from 4 pedigrees).

#### **Pedigree #31**

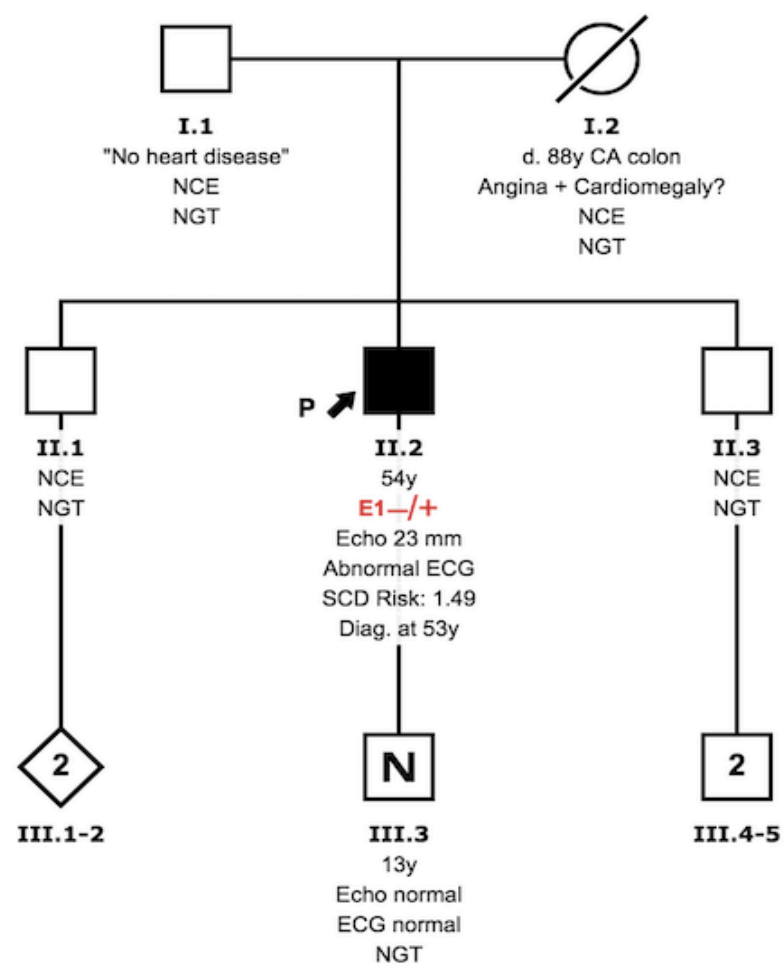

| Id   | Sex | TPM1<br>Arg21Leu | Other<br>mutat | Phenotype  | Age<br>at<br>Dx | Age<br>, y | NYH<br>A | AF | F<br>H<br>S<br>D | Max<br>LVH | TV<br>/<br>FV | Syncop<br>e | Abn<br>Vasc<br>Resp | LVOT<br>O<br>(Peak<br>grad) | LV<br>Dysf<br>(EF) | Events | Additional<br>features | Others                |
|------|-----|------------------|----------------|------------|-----------------|------------|----------|----|------------------|------------|---------------|-------------|---------------------|-----------------------------|--------------------|--------|------------------------|-----------------------|
| II.2 | M   | Yes              | No             | HCM septal | 53              | 54         | I        | -  | -                | 23         | -             | -           | -                   | - (23)                      | - (80)             |        | Holter: clear          | Multiple<br>sclerosis |

Abn BP resp, abnormal blood pressure response on exercise; AF, atrial fibrillation; Dx, diagnosis; DCM, dilated cardiomyopathy; ECG, electrocardiogram; Echo, echocardiogram; FHSD, family history of sudden death; HCM, hypertrophic cardiomyopathy; Id, individual; ICD, implanted cardioverter defibrillator; LA, left atrium; LGE, late gadolinium enhancement; LVH, left ventricular hypertrophy; LVOTO (peak grad), left ventricle outflow tract obstruction (gradient in mmHg); LV dysf (EF), systolic dysfunction (ejection fraction); max LVH, left ventricular hypertrophy (maximal ventricular wall thickness in mm); MRI, magnetic resonance imaging; NYHA, New York Heart Association functional class; NCE, no clinical evaluation; NGT, no genetic testing; NSVT, nonsustained ventricular tachycardia; SAH, systemic arterial hypertension; SCD, sudden cardiac death; VT/VF, ventricular tachycardia/ventricular fibrillation; E1, TPM1 p.Arg21Leu. The index case is described in the gray line;

## REFERENCES

1. Ly T, Krieger I, Tolkatchev D, et al. Structural destabilization of tropomyosin induced by the cardiomyopathy-linked mutation R21H. *Protein Sci.* 2018;27:498-508.
2. Fokstuen S, Munoz A, Melacini P, et al. Rapid detection of genetic variants in hypertrophic cardiomyopathy by custom DNA resequencing array in clinical practice. *J Med Genet.* 2011;48:572–576.
3. Murakami K, Stewart M, nozawa K, et al. Structural basis for tropomyosin overlap in thin (actin) filaments and the generation of a molecular swivel by troponin-T. *Proc Natl Acad Sci U S A.* 2008;105:7200-7205.
4. Matyushenko AM, Koubassova NA, Shchepkin DV, et al. The effects of cardiomyopathy-associated mutations in the head-to-tail overlap junction of  $\alpha$ -tropomyosin on its properties and interaction with actin. *Int J Biol Macromol.* 2019 Mar 15;125:1266-1274.
5. Greenfield NJ, Fowler VM. Tropomyosin requires an intact N-terminal coiled coil to interact with tropomodulin. *Biophys J.* 2002;82:2580-2591.
6. Colpan M, Ly T, Grover S, et al. The cardiomyopathy-associated K15N mutation in tropomyosin alters actin filament pointed end dynamics. *Arch Biochem Biophys.* 2017;630:18-26.

7. Walsh R, Thomson, KL, Ware J, et al. Hugh, Exome Aggregation, Consortium. Reassessment of Mendelian gene pathogenicity using 7,855 cardiomyopathy cases and 60,706 reference samples. *Genet Med*. 2017;19:192-203.
8. Zimmerman RS, Cox S, Lakdawala NK, et al. A novel custom resequencing array for dilated cardiomyopathy. *Genet Med*. 2010;12:268-278.
9. Hershberger RE, Norton N, Morales A, et al. Coding Sequence Rare Variants Identified in MYBPC3, MYH6, TPM1, TNNC1 and TNNI3 from 312 Patients with Familial or Idiopathic Dilated Cardiomyopathy. *Circ Cardiovasc Genet*. 2010;3:155-156.
10. Gomez J, Reguero JR, Moris C, et al. Mutation analysis of the main hypertrophic cardiomyopathy genes using multiplex amplification and semiconductor next-generation sequencing. *Circ J*. 2014;78:2963-2971.
11. Coppini R, Ho CY, Ashley E, et al. Clinical Phenotype and Outcome of Hypertrophic Cardiomyopathy Associated With Thin-Filament Gene Mutations. *J Am Coll Cardiol*. 2014;64:2589-2600.
12. Otsuka H, Arimura T, Abe T, et al. Prevalence and Distribution of Sarcomeric Gene Mutations in Japanese Patients With Familial Hypertrophic Cardiomyopathy. *FEBS J*. 2011;278:1619-1633.
13. Marian AJ, Braunwald E. Hypertrophic Cardiomyopathy: Genetics, Pathogenesis, Clinical Manifestations, Diagnosis, and Therapy. *Circ Res*. Author manuscript; available in PMC 2018 Sep 15. Published in final edited form as: *Circ Res*. 2017;121:749-770.
